# Supplementary material for: Metagenomics Insight of Veterinary and Zoonotic Pathogens Identified On Urban Wetlands of Los Lagos, Chile
Source: Preprints.org preprint supplement (doi:10.20944/preprints202407.1746.v1), 2024-07-22
Supplement: Supplementary file 1 [file supplementary]

## Sheet: especies.reportk2.taxas
Taxa	Quemas	Ovejeria	Loto	Baquedano	Ranas	Teodosio1	Teodosio2	Marina	Quebrada	LuisEbel1	LuisEbel2	LaPaloma	Antiñir	Rupalan	Mirasol
[Acidovorax] ebreus	2.5e-05	7.92e-05	2.45e-06	9.97e-07	0	4.94e-06	1.22e-06	0	1.55e-07	4.86e-08	2.14e-07	5.48e-05	1.63e-06	3.25e-07	7.91e-06
[Clostridium] colinum	1.98e-06	1.04e-05	4.32e-05	1.11e-07	1.01e-06	0	0	0	0	0	0	1.47e-05	2.42e-07	0	1.29e-07
[Clostridium] hylemonae	3.17e-06	5.22e-06	0	1.11e-06	0	0	0	0	0	4.86e-08	0	3.61e-05	0	3.64e-06	5.79e-07
[Clostridium] innocuum	2.38e-06	1.83e-05	0	2.22e-07	0	1.03e-07	0	0	0	0	0	2.54e-05	6.05e-08	4.55e-07	3.41e-06
[Clostridium] scindens	3.97e-07	6.96e-06	0	3.32e-07	0	3.09e-07	3.5e-08	0	7.75e-07	0	1.07e-07	6.01e-05	1.21e-07	5.86e-07	3.15e-06
[Enterobacter] lignolyticus	4.25e-05	1.31e-05	5.06e-05	7.31e-05	8.18e-07	8.72e-05	3.22e-06	3.39e-05	5.66e-05	2.58e-05	0.000538667	5.48e-05	2.66e-05	0.000112498	8.43e-06
[Haemophilus] ducreyi	3.17e-06	1.74e-06	6.13e-08	4.54e-06	0	1.65e-06	1.05e-07	3.29e-06	2.71e-05	4.86e-08	1.07e-07	3.74e-05	0	4.16e-06	2.57e-07
[Mycobacterium] stephanolepidis	1.19e-05	2.61e-05	2.45e-07	6.65e-07	0	3.09e-07	6.65e-07	0	3.1e-07	1.46e-07	1.07e-07	1.6e-05	1.21e-07	6.51e-08	2.57e-07
[Ochrobactrum] quorumnocens	2.06e-05	7.23e-05	8.64e-06	4.43e-07	0	4.12e-07	5.42e-06	0.000132871	2.64e-06	2.43e-07	1.61e-06	2.67e-05	1.82e-07	3.25e-07	1.09e-06
[Pantoea] beijingensis	7.94e-07	0	3.06e-07	2.05e-05	3.15e-07	1.96e-06	3.15e-07	2.98e-06	4.34e-06	3.89e-07	5.03e-06	1.07e-05	1.14e-05	3.84e-06	1.29e-07
[Phormidium] sp. ETS-05	4.76e-06	5.22e-06	0	2.22e-07	0	0	3.5e-08	1.57e-07	3.1e-07	0	0	7.35e-05	1.82e-06	1.95e-07	6.43e-08
[Pseudomonas] carboxydohydrogena	2.22e-05	0.000458804	0	1.99e-06	0	8.23e-07	3.5e-08	3.92e-06	0	0	0	0.000407346	4.18e-06	8.46e-07	2.12e-06
[Pseudomonas] zhaodongensis	5.16e-06	1.74e-05	4.78e-06	1.1e-05	2.52e-07	6.17e-06	3.88e-06	2.12e-05	1.55e-06	9.05e-06	1.09e-05	4.27e-05	2.48e-06	2.47e-05	1.31e-05
[Ruminococcus] gnavus	1.19e-06	6.96e-06	0	8.42e-06	0	0	0	0	0	0	0	3.34e-05	6.05e-08	1.3e-07	6.41e-05
[Ruminococcus] torques	7.94e-07	2.61e-06	0	3.32e-07	0	3.09e-07	0	0	0	0	0	1.34e-05	1.82e-07	6.51e-08	1.36e-05
Abyssalbus ytuae	2.98e-05	8.53e-05	0	1.11e-07	0	1.13e-06	0	1.57e-07	3.88e-06	0	3.21e-07	3.07e-05	8.48e-07	2.54e-06	1.8e-06
Abyssibius alkaniclasticus	3.29e-05	0.000114048	6.13e-08	3.1e-06	0	2.37e-06	0	3.14e-07	9.3e-07	1.95e-07	1.07e-07	9.22e-05	7.26e-07	0	1.61e-06
Acaryochloris marina	1.19e-06	1.83e-05	0	1.11e-07	0	4.12e-07	2.45e-07	1.41e-06	5.43e-06	0	1.28e-06	5.74e-05	1.82e-07	1.3e-07	9.65e-07
Acetobacter aceti	7.54e-06	0.000243767	0	9.86e-06	0	3.09e-07	4.9e-07	2.98e-06	1.55e-07	4.86e-08	1.07e-07	0.000117529	1.7e-06	7.94e-06	9.65e-07
Acetobacter ghanensis	7.94e-07	5.22e-06	0	2.22e-07	0	4.12e-07	2.45e-07	4.71e-07	0	9.73e-08	1.28e-06	3.87e-05	6.05e-08	3.25e-07	9.97e-06
Acetobacter orientalis	3.57e-06	1.22e-05	0	2.22e-07	0	9.26e-07	3.85e-07	0	1.71e-06	0	0	4.67e-05	2.12e-06	6.51e-08	8.36e-07
Acetobacter pasteurianus	0	1.13e-05	0	3.32e-07	0	5.15e-07	8.4e-07	1.16e-05	0	9.73e-08	5.35e-07	1.87e-05	2.42e-07	6.51e-08	4.5e-07
Acetobacter persici	7.14e-06	1.13e-05	4.41e-06	0	0	4.12e-07	7e-08	1.25e-06	3.1e-07	1.95e-06	2.14e-06	6.14e-05	2.6e-06	1.76e-06	1.8e-06
Acetobacter vaccinii	7.54e-06	6.96e-06	0	3.32e-07	0	8.23e-07	2.1e-07	0	0	0	3.21e-07	4.67e-05	3.63e-07	4.81e-06	9.01e-07
Acetobacterium sp. KB-1	2.78e-06	8.71e-06	6.13e-08	0	8.81e-07	2.06e-07	1.05e-07	0	0	0	0	2.4e-05	1.21e-07	0	2.9e-06
Acetobacterium wieringae	3.17e-06	4.35e-06	0	2.22e-07	0	1.13e-06	1.05e-07	0	0	0	0	3.87e-05	1.82e-07	0	3.67e-06
Achromobacter aegrifaciens	4.52e-05	5.22e-06	0	6.65e-07	0	6.17e-07	7e-08	4.71e-07	3.1e-06	4.86e-08	0	1.47e-05	9.75e-06	6.51e-08	1.42e-06
Achromobacter deleyi	0.000973694	7.31e-05	4.35e-06	3.21e-06	4.41e-07	6.79e-06	3.22e-06	1.41e-06	1.71e-06	1.46e-06	1.02e-05	0.000157596	1.7e-05	1.11e-06	1.56e-05
Achromobacter denitrificans	0.000577709	0.000215908	5.94e-06	1.24e-05	7.55e-07	6.59e-06	1.57e-06	1.88e-06	1.09e-06	1.07e-06	5.99e-06	0.000239065	1.33e-05	1.89e-06	9.39e-06
Achromobacter insolitus	0.000480895	0.000128848	1.23e-07	5.32e-06	0	3.4e-06	4.9e-06	6.27e-06	1.4e-06	1.61e-06	9.53e-06	0.000200334	1.05e-05	3.64e-06	8.88e-06
Achromobacter mucicolens	0.000298377	8.53e-05	4.9e-07	3.55e-06	6.29e-08	3.91e-06	2.1e-07	2.82e-06	1.09e-06	1.42e-05	1.01e-05	0.000134892	2.16e-05	3.38e-06	5.08e-06
Achromobacter pestifer	0.000299568	5.83e-05	4.78e-06	3.66e-06	0	6.07e-06	5.95e-07	9.41e-07	9.3e-07	0	2.25e-06	0.000100167	4.18e-06	1.95e-07	4.05e-06
Achromobacter ruhlandii	0.000196802	3.57e-05	0	2.22e-06	0	3.09e-06	7e-07	1.57e-06	6.36e-06	1.8e-06	9.63e-07	7.35e-05	1.68e-05	1.95e-07	3.09e-06
Achromobacter sp. 77	5.83e-05	2.26e-05	0	4.43e-07	1.13e-06	8.23e-07	2.8e-07	6.27e-07	2.02e-06	4.86e-08	2.14e-07	2.4e-05	4.78e-06	1.43e-06	6.82e-06
Achromobacter sp. AONIH1	0.000314645	2.96e-05	1.23e-06	5.87e-06	0	7.51e-06	1.26e-06	1.57e-06	6.2e-07	2.14e-06	7.49e-06	0.000146912	2.36e-05	3.25e-07	6.56e-06
Achromobacter sp. B7	0.000291632	6.96e-06	2.45e-07	0	0	8.23e-07	3.5e-08	0	0	4.86e-07	1.07e-06	3.07e-05	3.03e-07	0	4.12e-06
Achromobacter sp. ES-001	0.000323374	2.26e-05	1.47e-06	6.65e-07	0	1.54e-06	7.35e-07	1.1e-06	3.1e-07	0	8.56e-07	3.07e-05	1.21e-07	1.08e-05	6.56e-06
Achromobacter sp. MFA1 R4	0.000479308	6.62e-05	6.74e-07	1.88e-06	0	4.12e-06	1.5e-06	1.1e-06	4.65e-07	4.86e-07	3.64e-06	0.000124207	1.85e-05	1.89e-06	1.18e-05
Achromobacter sp. R39	0.00159743	8.79e-05	8.82e-06	3.1e-06	1.26e-07	6.48e-06	3.78e-06	4.55e-06	1.4e-06	7.3e-07	5.46e-06	0.000109516	1.39e-05	7.81e-07	4.7e-06
Achromobacter spanius	0.00286514	0.000176731	9.74e-06	7.09e-06	0	1.18e-05	6.61e-06	2.04e-06	2.17e-06	4.38e-06	2.35e-05	0.000263106	2.16e-05	7.61e-06	3.24e-05
Achromobacter xylosoxidans	0.000924097	0.000261179	3.2e-05	9.97e-06	2.39e-06	1.16e-05	1.08e-05	4.08e-06	2.33e-06	3.5e-06	1.01e-05	0.000458097	4.67e-05	3.64e-06	1.67e-05
Acidaminococcus fermentans	1.98e-06	2.61e-06	0	8.86e-07	0	2.88e-06	0	0	0	0	2.14e-07	7.88e-05	0	0	1.09e-06
Acidibrevibacterium fodinaquatile	1.67e-05	0.000215908	4.9e-06	3.32e-07	0	4.12e-07	2.34e-06	1.57e-07	7.75e-07	0	6.42e-07	0.000264441	1.19e-05	6.51e-08	3.15e-06
Acididesulfobacillus acetoxydans	2.78e-06	4.79e-05	6.13e-08	0	0	1.03e-07	3.5e-08	0	0	0	2.14e-07	5.21e-05	3.63e-07	0	6.43e-08
Acidiferrobacter sp. SPIII_3	2.78e-06	4.35e-06	0	2.55e-06	0	8.23e-07	0	4.71e-07	0	2.92e-07	0	9.35e-05	2.36e-06	1.95e-07	1.93e-07
Acidiferrobacter thiooxydans	7.14e-06	5.22e-06	0	6.65e-07	0	2.06e-07	0	0	0	0	0	8.55e-05	1.82e-07	6.51e-08	1.09e-06
Acidihalobacter aeolianus	1.71e-05	1.92e-05	0	8.86e-07	6.29e-08	1.75e-06	1.75e-07	0	0	4.86e-08	1.07e-06	0.00015359	1.33e-05	0	1.74e-06
Acidihalobacter ferrooxydans	7.54e-06	3.22e-05	0	2.44e-06	0	8.23e-07	0	9.41e-07	2.48e-06	3.89e-07	1.07e-07	0.000132221	2e-06	5.21e-07	1.87e-06
Acidihalobacter yilgarnensis	1.03e-05	2.09e-05	0	6.31e-06	0	1.75e-06	7e-08	4.71e-07	6.2e-07	9.73e-08	7.49e-07	0.000118865	9.69e-07	3.25e-07	9.01e-07
Acidimicrobium ferrooxidans	1.59e-06	6.96e-06	0	3.32e-07	0	4.12e-07	0	0	0	0	0	0.000138898	7.26e-07	0	3.86e-07
Acidiphilium multivorum	5.55e-06	8.97e-05	3.06e-06	5.54e-07	0	5.15e-07	8.4e-07	7.84e-07	0	0	1.07e-07	6.68e-05	4.24e-07	0	1.93e-07
Acidipropionibacterium acidipropionici	5.55e-06	2.09e-05	2.02e-06	1.11e-07	0	1.13e-06	7.7e-07	1.57e-07	3.1e-07	0	0	4.94e-05	5.45e-07	3.25e-07	1.03e-06
Acidipropionibacterium jensenii	3.57e-06	2.26e-05	0	8.86e-07	0	2.06e-07	1.47e-06	0	0	0	2.14e-07	5.21e-05	1.03e-06	0	7.72e-07
Acidipropionibacterium virtanenii	5.95e-06	6.09e-06	0	2.22e-07	0	1.03e-06	7e-08	0	1.55e-07	0	1.07e-06	2.27e-05	2.54e-06	1.95e-07	8.36e-07
Acidisarcina polymorpha	4.36e-06	1.04e-05	6.13e-08	3.32e-07	7.55e-07	1.34e-06	1.05e-07	0	0	1.46e-07	2.14e-07	0.000197663	9.08e-07	3.9e-07	3.22e-07
Acidisoma sp. PAMC 29798	1.55e-05	7.14e-05	1.47e-06	9.97e-07	0	1.03e-06	6.3e-07	3.14e-07	4.65e-07	8.27e-07	3.21e-07	0.000186979	1.7e-06	3.25e-06	1.93e-06
Acidithiobacillus caldus	5.16e-06	4.09e-05	0	2.22e-07	0	4.12e-07	7e-08	3.14e-07	0	0	5.35e-07	8.55e-05	1.76e-06	3.25e-07	8.17e-06
Acidithiobacillus ferriphilus	3.57e-06	1.57e-05	0	0	0	1.44e-06	2.45e-07	0	0	1.95e-07	0	8.81e-05	4.84e-07	2.99e-06	1.16e-06
Acidithiobacillus ferrivorans	1.43e-05	1.48e-05	1.78e-05	2.22e-07	0	1.75e-06	4.55e-07	3.14e-07	0	1.95e-07	1.07e-07	8.41e-05	4.24e-07	0	2.32e-06
Acidithiobacillus ferrooxidans	1.19e-06	7.84e-06	0	6.65e-07	0	4.32e-06	0	0	0	4.86e-08	8.56e-07	6.54e-05	4.84e-07	0	9.65e-07
Acidithiobacillus sp. AMEEHan	1.59e-06	1.22e-05	0	2.22e-07	0	7.2e-07	3.5e-08	1.57e-07	0	0	5.35e-07	8.81e-05	1.82e-07	0	2.19e-06
Acidithiobacillus sp. YTS05	4.76e-06	8.71e-06	0	4.43e-07	0	3.09e-07	2.8e-07	0	0	4.86e-08	0	6.94e-05	5.45e-07	1.04e-06	1.03e-06
Acidithiobacillus thiooxidans	9.92e-06	2.26e-05	0	4.43e-07	0	3.09e-07	6.65e-07	0	0	1.95e-07	0	6.14e-05	1.21e-07	7.81e-07	1.16e-06
Acidobacterium capsulatum	7.54e-06	1.48e-05	0	3.32e-07	0	9.26e-07	4.9e-07	0	6.2e-07	0	3.21e-07	0.000289817	9.08e-07	1.3e-07	7.08e-07
Acidocella sp. MX-AZ03	1.75e-05	0.000163672	3.68e-07	1.99e-06	6.29e-08	8.23e-07	3.81e-06	0	1.55e-07	4.86e-08	3.21e-07	0.000178965	9.57e-06	1.04e-06	5.4e-06
Acidothermus cellulolyticus	1.55e-05	1.22e-05	0	1.11e-07	0	1.34e-06	0	0	3.1e-07	0	4.28e-07	7.08e-05	4.24e-07	1.3e-07	8.36e-07
Acidovorax carolinensis	0.000394001	0.00136248	1.35e-06	1.34e-05	7.05e-06	5.36e-05	6.65e-07	2.98e-06	1.09e-06	7.3e-07	5.14e-06	0.00038197	3.11e-05	8.46e-07	0.000355413
Acidovorax radicis	0.000673333	0.000956785	6.13e-08	1.38e-05	6.67e-06	4.38e-05	7e-08	9.41e-07	2.33e-06	8.76e-07	2.35e-06	0.00027379	1.93e-05	1.76e-06	0.000107641
Acidovorax sp. 1608163	0.000717772	0.00132418	1.23e-07	2.15e-05	6.29e-08	5.38e-05	1.4e-07	2.35e-06	0	5.35e-07	5.99e-06	0.000311186	1.99e-05	2.6e-06	9.42e-05
Acidovorax sp. 5MLIR	6.86e-05	0.000320379	5.21e-06	1.19e-05	6.29e-08	0.000101158	1.78e-06	9.41e-07	0	2.48e-06	5.92e-05	0.000231052	1.26e-05	3.12e-06	3.44e-05
Acidovorax sp. GBBC 1281	8.49e-05	0.000434428	1.23e-07	5.54e-06	0	1.35e-05	1.05e-07	3.14e-07	4.65e-07	0	1.93e-06	0.000186979	2.26e-05	7.16e-07	3.24e-05
Acidovorax sp. HDW3	0.000162679	0.000731301	0	7.31e-06	0	3.04e-05	1.75e-07	7.84e-07	9.3e-07	4.38e-07	2.14e-06	0.000260434	9.44e-06	9.11e-07	4.24e-05
Acidovorax sp. JMULE5	0.000344007	0.000769607	0	1.66e-05	1.72e-05	5.44e-05	3.15e-07	3.14e-07	0	9.73e-08	1.93e-06	0.000387313	2.34e-05	9.11e-07	0.000147403
Acidovorax sp. KKS102	0.000276554	0.000842737	1.47e-06	1.42e-05	1.89e-07	4.39e-05	3.5e-07	1.73e-06	0	2.87e-06	3.1e-06	0.000364608	2.52e-05	3.25e-06	0.000124948
Acidovorax sp. NCPPB 3576	0.00010594	0.000632053	0	7.2e-06	6.29e-08	2.43e-05	2.1e-07	6.27e-07	9.3e-07	4.86e-08	2.03e-06	0.000178965	1.78e-05	2.52e-05	3.1e-05
Acidovorax sp. RAC01	0.000224577	0.000814878	1.23e-07	1.35e-05	1.26e-07	4.09e-05	2.45e-07	2.82e-06	7.75e-07	4.86e-08	3.53e-06	0.000283139	2.05e-05	3.38e-06	0.000155509
Acidovorax sp. T1	0.000188073	0.000692995	6.13e-08	6.87e-06	0	3.2e-05	0	6.27e-07	0	9.73e-08	4.92e-06	0.000236394	1.2e-05	2.6e-07	0.000175776
Acidovorax temperans	0.000318613	0.00103514	4.9e-07	1.11e-05	1.26e-07	3.82e-05	1.36e-06	6.27e-07	3.1e-07	9.73e-08	1.82e-06	0.000316528	2.05e-05	6.25e-06	9.13e-05
Acinetobacter baumannii	1.59e-05	2.79e-05	1.9e-06	0.000134384	5.07e-05	7.39e-05	3.81e-05	6.76e-05	7.44e-05	1.65e-06	4.07e-06	8.81e-05	2.95e-05	3.84e-06	0.00209922
Acinetobacter baylyi	3.57e-06	5.22e-06	1.84e-06	6.09e-06	1.89e-07	4.65e-05	3.05e-05	1.99e-05	8.36e-05	4.86e-08	1.07e-07	2.27e-05	2.6e-06	2.73e-06	0.00044491
Acinetobacter bereziniae	1.59e-06	7.84e-06	3.8e-06	2.1e-06	2.27e-06	3.43e-05	1.18e-05	2.75e-05	1.72e-05	0	1.07e-07	1.6e-05	0	6.51e-08	0.000466206
Acinetobacter bouvetii	3.17e-06	8.71e-06	1.84e-07	5.54e-06	2.45e-06	2.04e-05	7.1e-06	4.63e-05	4.73e-05	8.76e-07	0	2.14e-05	1.82e-07	2.86e-06	0.000295255
Acinetobacter calcoaceticus	2.78e-06	3.57e-05	6.94e-05	0.00466224	3.27e-06	5.3e-05	2.61e-05	2.37e-05	6.45e-05	1.75e-06	2.14e-06	0.000767948	6.66e-06	9.96e-06	0.00070954
Acinetobacter chinensis	7.94e-07	3.48e-06	2.51e-06	3.88e-06	1.64e-06	3.65e-05	8.19e-06	1.27e-05	2.53e-05	9.73e-08	7.49e-07	6.68e-06	6.05e-08	0	0.000279492
Acinetobacter colistiniresistens	2.38e-06	5.22e-06	5.64e-05	3.43e-06	6.92e-07	3.54e-05	2.17e-05	1.32e-05	3.66e-05	0	3.21e-07	2e-05	2.3e-06	0	0.000318289
Acinetobacter cumulans	3.97e-07	8.71e-07	3.37e-05	6.65e-06	5.04e-06	6.39e-05	2.64e-05	4.27e-05	6.37e-05	0	3.21e-07	1.47e-05	3.03e-07	6.51e-08	0.00118064
Acinetobacter defluvii	1.59e-06	2.61e-06	1.98e-05	9.42e-06	2.2e-06	7.28e-05	3.84e-05	3.2e-05	7.63e-05	0	3.21e-07	2.8e-05	1.21e-07	3.25e-07	0.00103471
Acinetobacter dispersus	1.59e-06	4.35e-06	0	4.1e-06	0	2.2e-05	1.07e-05	1.16e-05	2.54e-05	0	0	9.35e-06	3.03e-07	1.04e-06	0.000379798
Acinetobacter equi	2.38e-06	2.87e-05	3.43e-06	9.64e-06	2.27e-06	8.98e-05	2.61e-05	3.25e-05	5.78e-05	1.31e-06	2.14e-07	2.54e-05	3.63e-07	1.11e-06	0.000780957
Acinetobacter guillouiae	1.59e-06	5.22e-06	5.73e-05	9.53e-06	2.52e-07	3.17e-05	7.28e-06	0.00484845	1.4e-05	0	0	1.2e-05	4.42e-06	3.71e-06	0.000253885
Acinetobacter haemolyticus	3.97e-06	1.92e-05	4.32e-05	1.15e-05	3.65e-06	7.49e-05	2.45e-05	2.79e-05	5.46e-05	4.86e-08	8.56e-07	3.07e-05	2.42e-07	4.42e-06	0.00059598
Acinetobacter indicus	9.13e-06	2.26e-05	3.36e-05	2.16e-05	0.000177378	0.00014685	7.39e-05	6.4e-05	0.000128861	8.27e-07	3.75e-06	8.01e-05	1.39e-06	2.32e-05	0.0023394
Acinetobacter johnsonii	1.27e-05	3.4e-05	3.12e-05	0.000101037	4.93e-05	0.000362339	8.81e-05	0.000242211	0.000155377	2.82e-06	7.28e-06	0.000128214	2.85e-06	6.44e-06	0.00901948
Acinetobacter junii	1.59e-06	5.22e-06	0	2.88e-06	1.01e-06	3.14e-05	0.000114751	2.51e-05	0.000235081	0	0	3.07e-05	8.48e-07	2.15e-06	0.000399229
Acinetobacter lactucae	0	1.74e-06	0	1.42e-05	6.29e-08	4.32e-06	3.99e-06	1.41e-06	6.98e-06	0	3.21e-07	4.01e-06	6.05e-08	0	3.12e-05
Acinetobacter lanii	7.94e-07	2.61e-06	1.85e-05	6.54e-06	3.02e-06	7.9e-05	4.15e-05	3.98e-05	0.000101104	0	0	1.2e-05	1.21e-07	9.76e-07	0.00118855
Acinetobacter larvae	1.98e-06	1.13e-05	1.84e-07	3.55e-06	6.04e-06	4.48e-05	0.000112511	2.26e-05	0.000258031	0	5.35e-07	2.54e-05	7.26e-07	8.46e-06	0.000321442
Acinetobacter lwoffii	5.55e-06	4.7e-05	1.16e-06	8.09e-06	0.000554669	6.06e-05	2.43e-05	3.48e-05	4.08e-05	1.7e-06	2.89e-06	4.54e-05	6.66e-07	1.17e-06	0.00115992
Acinetobacter nosocomialis	3.57e-06	0.000149743	2.54e-05	4.18e-05	2.52e-06	2.43e-05	1.6e-05	1.07e-05	3.58e-05	0	1.39e-06	3.47e-05	3.63e-07	2.6e-07	0.00100499
Acinetobacter oleivorans	3.97e-07	0	0	3.63e-05	6.29e-08	3.91e-06	1.68e-06	1.1e-06	2.02e-06	0	0	9.35e-06	0	0	3.13e-05
Acinetobacter piscicola	9.52e-06	6.09e-06	4.29e-06	1.58e-05	3.34e-06	8.79e-05	5.81e-05	4.08e-05	0.00011599	7.3e-07	7.49e-07	2.4e-05	4.84e-07	3.9e-07	0.00135448
Acinetobacter pittii	8.73e-06	1.48e-05	3.06e-07	0.000184903	1.7e-06	6.8e-05	3.07e-05	2.18e-05	0.000125139	7.78e-07	9.63e-07	6.54e-05	4.84e-07	7.55e-06	0.000458228
Acinetobacter portensis	3.97e-07	8.71e-07	6.13e-08	1.66e-06	7.87e-06	2.22e-05	1.64e-06	6.27e-06	5.89e-06	0	1.07e-07	2.67e-06	0	0	0.000482291
Acinetobacter proteolyticus	1.19e-06	1.74e-06	6.13e-08	2.66e-06	1.89e-06	2.64e-05	1.21e-05	1.24e-05	2.36e-05	0	1.61e-06	1.6e-05	3.03e-07	9.24e-06	0.00026952
Acinetobacter pseudolwoffii	1.19e-06	5.22e-06	4.47e-06	2.33e-06	0.0044721	3.37e-05	9.8e-06	1e-05	1.88e-05	1.46e-07	3.21e-07	9.35e-06	4.24e-07	8.13e-06	0.001082
Acinetobacter radioresistens	2.78e-06	1.22e-05	1.36e-05	9.86e-06	1.58e-05	6.18e-05	2.67e-05	2.79e-05	6.57e-05	1.46e-07	1.07e-07	5.74e-05	1.88e-06	5.21e-07	0.00126846
Acinetobacter schindleri	4.76e-06	1.39e-05	7.35e-07	1.15e-05	0.000126582	6.59e-05	4.73e-05	3.22e-05	7.88e-05	4.38e-07	5.35e-07	4.27e-05	1.7e-06	2.28e-06	0.0014324
Acinetobacter seifertii	5.16e-06	1.31e-05	3.86e-06	7.66e-05	4.72e-06	5.72e-05	2.01e-05	1.96e-05	5.95e-05	8.76e-07	1.28e-06	4.27e-05	1.33e-06	5.21e-07	0.000521153
Acinetobacter septicus	0	0	0	2.22e-07	1.89e-07	4.43e-06	3.5e-07	1.73e-06	1.24e-06	4.86e-08	0	4.01e-06	0	0	8.82e-05
Acinetobacter shaoyimingii	3.97e-06	2.61e-06	4.17e-06	9.2e-06	3.4e-06	5.93e-05	3.26e-05	3.86e-05	7.64e-05	0	0	2e-05	1.7e-06	1.95e-07	0.000839442
Acinetobacter soli	2.78e-06	2.09e-05	2.21e-05	1.01e-05	1.08e-05	6.27e-05	3.41e-05	2.68e-05	7.83e-05	8.76e-07	4.28e-07	3.47e-05	1.88e-06	4.03e-06	0.000666818
Acinetobacter sp. 10FS3-1	1.59e-06	8.71e-06	4.29e-05	6.2e-06	3.47e-05	4.17e-05	3.38e-05	2.15e-05	5.58e-05	9.73e-08	2.68e-06	3.07e-05	2.48e-06	2.21e-06	0.000554095
Acinetobacter sp. ACNIH1	3.97e-07	0	6.13e-08	5.54e-07	7.87e-06	6.17e-07	2.45e-07	1.57e-06	1.4e-06	0	0	9.35e-06	1.21e-07	1.56e-06	7.01e-05
Acinetobacter sp. ACNIH2	3.97e-07	1.74e-06	6.13e-08	2.77e-06	2.27e-06	3.58e-05	4.79e-06	1.1e-05	4.96e-05	4.86e-08	1.07e-07	9.35e-06	6.05e-08	0	0.000993857
Acinetobacter sp. AHP123	1.19e-06	6.09e-06	6.13e-08	5.93e-05	9.57e-06	4.84e-06	3.71e-06	2.35e-06	3.26e-06	0	2.14e-07	2e-05	6.05e-08	0	0.000134406
Acinetobacter sp. ANC 7201	0	3.48e-06	1.84e-07	1.99e-06	3.15e-06	1.57e-05	3.43e-06	7.22e-06	1.19e-05	0	0	2.67e-06	1.21e-07	0	0.000232653
Acinetobacter sp. AS23	0	6.09e-06	6.13e-08	2.1e-05	0	1.44e-06	1.47e-06	1.73e-06	8.37e-06	0	0	8.01e-06	0	2.6e-07	4.93e-05
Acinetobacter sp. ASP199	0	4.35e-06	3.06e-07	3.43e-06	1.27e-05	2.33e-05	7.8e-06	1.54e-05	1.86e-05	0	0	9.35e-06	5.45e-07	0	0.00054824
Acinetobacter sp. BHS4	0	0	0	3.55e-06	0	1.96e-06	2.8e-07	4.71e-07	1.4e-06	0	0	4.01e-06	0	0	1.68e-05
Acinetobacter sp. C16S1	1.98e-06	0	8.58e-06	3.43e-06	0	2.13e-05	7.66e-06	7.53e-06	3.1e-05	0	0	1.2e-05	6.05e-08	0	0.000212386
Acinetobacter sp. C32I	3.97e-07	8.71e-06	1.84e-07	2.99e-06	2.52e-07	2.26e-05	1.48e-05	9.88e-06	2.9e-05	0	0	2.14e-05	0	1.95e-07	0.000279428
Acinetobacter sp. Colony158	0	0	0	1.11e-07	8.18e-07	4.01e-06	4.48e-06	2.2e-06	6.67e-06	0	0	0	0	0	5.29e-05
Acinetobacter sp. CS-2	1.19e-06	6.96e-06	5.7e-06	4.46e-05	1.1e-05	0.000191409	2.54e-05	0.000157657	6.13e-05	4.86e-08	7.49e-07	6.01e-05	1.57e-06	1.69e-06	0.00727876
Acinetobacter sp. ESL0695	1.98e-06	4.09e-05	1.23e-07	2.88e-06	4.28e-06	3.62e-05	2.27e-05	9.41e-06	4.22e-05	0	0	1.6e-05	0	3.25e-07	0.000212514
Acinetobacter sp. F9	3.97e-07	4.35e-06	6.13e-08	2.1e-06	0.00119689	6.17e-06	1.61e-06	3.92e-06	2.02e-06	0	0	4.01e-06	0	3.9e-07	0.000108091
Acinetobacter sp. FDAARGOS_724	3.97e-07	0	0	2.22e-07	3.21e-06	2.47e-06	0	3.14e-07	0	0	0	0	0	0	2.83e-06
Acinetobacter sp. GSS19	1.98e-06	1.13e-05	5.36e-05	5.43e-06	8.06e-06	5.27e-05	3.1e-05	1.69e-05	6.57e-05	0	0	1.47e-05	9.08e-07	3.38e-06	0.000486473
Acinetobacter sp. KCTC 92772	3.97e-06	1.74e-06	4.78e-06	4.76e-06	8.81e-07	2.59e-05	1.8e-05	1.77e-05	3.46e-05	1.95e-07	0	2.27e-05	2.36e-06	9.11e-07	0.000507255
Acinetobacter sp. LoGeW2-3	2.78e-06	7.84e-06	3.06e-07	3.43e-06	8.25e-06	2.79e-05	1.15e-05	1.68e-05	3.29e-05	0	0	1.74e-05	6.05e-07	0	0.000370404
Acinetobacter sp. LUNF3	0	0	1.84e-07	1.44e-06	1.45e-06	7.31e-06	7e-08	2.51e-06	4.65e-07	0	0	1.34e-06	0	0	9.97e-05
Acinetobacter sp. M131	0	0	0	1.11e-07	0	2.06e-07	1.2e-05	0	0	0	0	0	6.05e-08	0	2.57e-07
Acinetobacter sp. Marseille-Q1620	8.73e-06	1.39e-05	1.16e-05	7.53e-06	1.26e-06	5.38e-05	5.21e-05	2.56e-05	0.000121727	0	0	2.94e-05	0	1.3e-07	0.000674153
Acinetobacter sp. MYb10	7.94e-07	4.35e-06	5.51e-07	1.02e-05	1.01e-06	1.15e-05	4.13e-06	5.73e-05	8.53e-06	6.81e-07	1.18e-06	5.34e-06	2.42e-07	1.95e-07	0.000119543
Acinetobacter sp. NCu2D-2	1.19e-06	6.96e-06	1.34e-05	7.76e-06	4.34e-06	5.68e-05	2.62e-05	2.81e-05	5.55e-05	4.86e-08	0	6.68e-06	4.24e-07	3.25e-07	0.00106708
Acinetobacter sp. NEB 394	0	8.71e-07	3.06e-07	3.21e-06	1.26e-07	5.87e-06	6.44e-06	7.69e-06	1.05e-05	1.46e-07	0	9.35e-06	0	0	0.000441178
Acinetobacter sp. NEB149	0	0	6.13e-08	5.54e-07	2.74e-05	9.36e-06	5.6e-07	1.73e-06	7.75e-07	9.73e-08	0	4.01e-06	0	0	8.24e-05
Acinetobacter sp. NyZ410	3.97e-07	2.61e-06	6.13e-08	2.88e-06	5.04e-07	8.85e-06	4.16e-06	3.09e-05	1.58e-05	0	0	2.67e-06	6.05e-08	0	4.82e-05
Acinetobacter sp. PK01	2.38e-06	1.74e-06	6.13e-08	2.33e-06	6.29e-08	4.72e-05	7.63e-06	8.94e-06	1.52e-05	0	0	5.34e-06	1.21e-07	0	0.000258389
Acinetobacter sp. SCLZS86	3.57e-06	3.48e-06	6.13e-08	3.1e-06	2.77e-06	2.76e-05	1.02e-05	1.38e-05	2.53e-05	1.95e-07	0	1.74e-05	0	1.6e-05	0.000494773
Acinetobacter sp. SH20PTE14	3.97e-07	1.74e-06	1.23e-07	1.44e-06	1.26e-06	2.16e-05	2.69e-06	5.65e-06	1.49e-05	0	0	2.67e-06	1.82e-07	6.51e-08	0.000130739
Acinetobacter sp. SWBY1	0	2.61e-06	0	9.97e-07	4.41e-06	5.87e-06	1.5e-06	4.24e-06	4.81e-06	0	0	8.01e-06	6.05e-08	0	0.000258903
Acinetobacter sp. TAC-1	0	9.58e-06	0	5.32e-06	5.04e-07	1.27e-05	6.79e-06	6.17e-05	1.8e-05	0	0	4.01e-06	0	0	0.000133441
Acinetobacter sp. TGL-Y2	1.98e-06	2.44e-05	5.51e-07	1.61e-05	5.35e-06	0.000138617	5.35e-05	7.09e-05	0.000121572	1.26e-06	8.56e-07	1.47e-05	4.24e-07	9.11e-07	0.00181927
Acinetobacter sp. Tol 5	0	8.71e-07	0	3.32e-07	1.26e-06	3.29e-06	4.06e-06	3.45e-06	1.12e-05	0	0	1.34e-06	6.05e-08	0	1.97e-05
Acinetobacter sp. TR11	3.97e-07	7.84e-06	0	9.97e-07	8.81e-07	2.27e-05	3.11e-06	9.26e-06	7.29e-06	0	0	4.01e-06	2.42e-07	2.41e-06	0.000120959
Acinetobacter sp. TR3	0	1.74e-05	6.13e-08	4.43e-07	8.18e-07	8.64e-06	7.14e-06	5.49e-06	5.43e-05	0	0	2.67e-06	0	0	8.48e-05
Acinetobacter sp. TTH0-4	9.52e-06	2.35e-05	6.25e-05	6.76e-05	1.89e-05	0.00120196	5.59e-05	0.000387474	0.000174915	0	1.5e-06	0.000126878	1.82e-06	1.85e-05	0.0154805
Acinetobacter sp. WCHA45	1.19e-06	4.35e-06	1.32e-05	3.1e-06	0	2.7e-05	9.06e-06	9.26e-06	2.57e-05	3.41e-07	0	9.35e-06	1.21e-07	1.95e-07	0.000161429
Acinetobacter sp. WCHA55	7.94e-07	2.61e-06	8.58e-07	4.65e-06	9.06e-06	4.33e-05	1.17e-05	1.71e-05	2.25e-05	0	3.21e-07	4.01e-06	5.45e-07	1.3e-07	0.000732509
Acinetobacter sp. WCHAc010034	1.98e-06	3.13e-05	5.4e-05	1.51e-05	4.91e-06	6.1e-05	2.04e-05	9.35e-05	3.21e-05	1.36e-06	1.07e-06	4.67e-05	2.78e-06	2.13e-05	0.00178389
Acinetobacter sp. WCHAc010052	0	1.74e-06	1.23e-07	7.53e-06	3.59e-06	3.55e-05	7.07e-06	1.19e-05	1.29e-05	0	2.14e-07	2e-05	3.03e-07	1.17e-06	0.000371627
Acinetobacter sp. WY4	7.94e-07	2.61e-06	0	2.22e-07	4e-05	5.87e-06	2.45e-06	1.88e-06	5.43e-06	2.43e-07	0	2.67e-06	0	0	9.44e-05
Acinetobacter sp. XS-4	2.38e-06	8.71e-06	0	0.000110344	7.55e-07	6.69e-06	7e-06	8.31e-06	2.22e-05	0	0	8.01e-06	6.05e-08	9.76e-07	0.000227827
Acinetobacter sp. YH12068_T	1.19e-06	2.61e-06	4.1e-06	1.66e-06	4.91e-06	9.36e-06	3.99e-06	5.18e-06	6.2e-06	9.73e-08	0	2.67e-06	1.82e-07	0	0.000122053
Acinetobacter sp. YH12138	3.97e-07	0	4.59e-06	4.76e-06	3.84e-06	1.3e-05	5.53e-06	9.1e-06	7.91e-06	4.86e-08	0	2.67e-06	0	0	0.00014322
Acinetobacter sp. YH16040_T	0	5.22e-06	1.23e-07	1.88e-06	6.92e-07	1.58e-05	6.82e-06	4.71e-06	2.14e-05	0	1.28e-06	2.67e-06	1.82e-07	7.16e-07	0.000348014
Acinetobacter sp. YH16056_T	7.94e-07	2.61e-06	1.1e-05	1.66e-06	2.14e-06	1.69e-05	4.62e-06	6.59e-06	1.26e-05	1.95e-07	0	2.67e-06	0	0	0.00014573
Acinetobacter sp. Z1	3.97e-07	1.39e-05	6.13e-08	3.66e-06	1.2e-06	5.59e-05	2.64e-05	1.57e-05	5.71e-05	9.73e-08	4.28e-07	1.87e-05	0	0	0.00063735
Acinetobacter terrestris	0	0	2.57e-06	6.54e-06	6.67e-06	9.88e-06	9.45e-07	1.62e-05	4.96e-06	0	0	6.68e-06	6.05e-08	0	0.000357279
Acinetobacter tibetensis	2.38e-06	4.35e-06	3.68e-07	1.26e-05	3.71e-06	6.08e-05	1.52e-05	6.04e-05	4.08e-05	1.46e-07	3.21e-07	2.54e-05	1.21e-07	6.51e-08	0.0035246
Acinetobacter towneri	1.07e-05	1.48e-05	3.68e-07	9.2e-06	1.59e-05	5.32e-05	2.2e-05	2.87e-05	4.99e-05	4.86e-08	1.07e-07	4.94e-05	2.3e-06	1.05e-05	0.000757215
Acinetobacter ursingii	1.19e-06	2e-05	2.14e-06	2.99e-06	6.61e-06	4.46e-05	1.44e-05	1.08e-05	3.58e-05	4.86e-08	1.5e-06	1.2e-05	3.03e-06	1.43e-06	0.000617405
Acinetobacter variabilis	5.95e-06	9.58e-06	1.84e-07	4.32e-06	0.000146724	3.63e-05	2.11e-05	2.45e-05	4.33e-05	3.41e-07	5.35e-07	3.47e-05	4.24e-07	1.69e-06	0.000700468
Acinetobacter venetianus	1.19e-06	8.71e-06	2.03e-05	9.2e-06	1.13e-06	6.78e-05	1.82e-05	1.44e-05	4.93e-05	0	1.07e-07	9.35e-06	1.21e-07	6.51e-08	0.000409909
Acinetobacter vivianii	1.59e-05	2.61e-06	1.84e-07	3.88e-06	2.83e-06	3.02e-05	1.55e-05	3.58e-05	3.27e-05	1.36e-06	1.5e-06	1.74e-05	3.09e-06	1.03e-05	0.000455269
Acinetobacter wanghuae	2.38e-06	6.09e-06	3.39e-05	8.64e-06	1.97e-05	6.78e-05	3.97e-05	4.61e-05	9.3e-05	4.86e-08	0	1.87e-05	1.21e-07	0	0.00120843
Acinetobacter wuhouensis	3.97e-06	7.84e-06	7.96e-07	1.83e-05	3.65e-06	0.000103628	5.56e-05	5.27e-05	9.94e-05	0	6.42e-07	2e-05	1.82e-07	1.17e-06	0.00139418
Actibacterium sp. EMB200-NS6	1.79e-05	0.000302968	0	3.32e-07	0	6.17e-07	7e-08	1.57e-07	3.1e-07	0	3.21e-07	8.15e-05	7.26e-07	5.21e-07	3.02e-06
Actinacidiphila bryophytorum	7.94e-06	2.7e-05	6.13e-08	2.88e-06	0	2.78e-06	1.75e-07	1.57e-07	0	1.22e-06	1.07e-07	0.000100167	5.45e-07	7.61e-06	1.93e-06
Actinoalloteichus hoggarensis	1.31e-05	3.13e-05	0	4.43e-07	6.29e-08	3.09e-07	3.5e-08	0	0	4.86e-07	1.07e-07	6.28e-05	2.12e-06	0	1.35e-06
Actinoalloteichus hymeniacidonis	1.35e-05	5.14e-05	6.13e-08	7.76e-07	1.57e-06	3.09e-07	1.05e-07	0	0	1.12e-06	4.28e-07	6.94e-05	6.66e-07	6.51e-08	9.65e-07
Actinobacillus delphinicola	2.38e-06	7.84e-06	2.21e-05	2.22e-06	0	9.26e-07	2.45e-07	3.14e-07	1.19e-05	1.7e-06	1.5e-06	1.47e-05	2.18e-06	2.6e-07	0
Actinobacillus equuli	2.78e-06	2.35e-05	9.13e-06	6.31e-06	2.27e-06	9.26e-07	4.2e-07	1.88e-06	6.36e-06	0	3.21e-06	2.14e-05	3.63e-07	1.16e-05	1.29e-07
Actinobacillus genomosp. 2	0	1.04e-05	0	0	0	0	6.3e-07	3.14e-07	1.86e-06	0	0	2.67e-06	0	1.3e-07	7.46e-06
Actinobacillus indolicus	3.97e-07	8.71e-07	3.8e-06	1.11e-07	2.96e-06	3.4e-06	3.5e-08	3.14e-06	1.44e-05	0	1.07e-07	4.01e-06	1.21e-07	4.68e-06	3.86e-07
Actinobacillus pleuropneumoniae	7.94e-07	4.35e-06	6.13e-08	5.54e-07	2.96e-06	1.34e-06	0	1.41e-06	6.51e-06	0	4.28e-07	1.87e-05	6.05e-08	2.6e-06	1.29e-07
Actinobacillus porcitonsillarum	2.38e-06	8.71e-07	3.33e-05	5.54e-07	5.67e-07	4.32e-06	7.7e-07	1.41e-06	2.79e-05	1.07e-06	8.56e-07	1.34e-05	6.05e-07	5.21e-07	1.61e-06
Actinobacillus sp. GY-402	2.38e-06	4.35e-06	6.13e-08	6.65e-07	6.29e-07	1.44e-06	4.9e-07	5.8e-06	7.91e-06	4.86e-08	7.49e-07	3.61e-05	6.66e-06	1.13e-05	5.15e-07
Actinobacillus suis	0	6.09e-06	6.13e-08	1.11e-06	0	7.2e-07	1.85e-06	4.71e-07	2.95e-06	6.32e-07	4.28e-07	1.07e-05	4e-06	2.02e-06	0
Actinobaculum sp. 313	5.55e-06	1.57e-05	6.13e-08	0	0	2.68e-06	3.5e-08	2.51e-06	0	4.86e-08	6.42e-07	3.07e-05	1.21e-07	1.3e-07	1.93e-07
Actinocatenispora sera	7.14e-06	2.09e-05	4.9e-07	1.33e-06	0	6.17e-07	7e-07	0	0	0	1.07e-07	0.0001202	3.63e-06	1.3e-07	1.61e-06
Actinocatenispora thailandica	9.92e-06	3.57e-05	6.13e-08	1.44e-06	6.29e-08	6.17e-07	1.4e-07	0	0	4.86e-08	4.28e-07	0.000105509	5.02e-06	1.3e-07	2.44e-06
Actinokineospora sp. UTMC 2448	2.42e-05	2.96e-05	1.35e-06	2.44e-06	0	1.13e-06	1.75e-07	0	1.55e-07	3.41e-07	2.03e-06	0.000162938	1.63e-06	1.3e-07	3.73e-06
Actinomadura graeca	1.23e-05	3.66e-05	3.06e-07	9.97e-07	0	8.23e-07	1.26e-06	1.73e-06	2.02e-06	3.41e-07	1.07e-07	0.000168281	6.96e-06	0	3.28e-06
Actinomadura madurae	6.35e-06	8.53e-05	6.13e-08	1.22e-06	7.18e-06	5.15e-07	3.5e-08	1.57e-07	1.55e-07	4.86e-08	2.14e-07	0.000157596	6.24e-06	0	2.51e-06
Actinomadura sp. NAK00032	1.19e-05	1.31e-05	6.13e-08	2.66e-06	0	1.44e-06	2.1e-07	0	0	1.95e-07	0	0.000204341	3.33e-06	6.51e-07	1.99e-06
Actinomadura sp. WMMA1423	1.07e-05	4.18e-05	3.37e-06	1.55e-06	6.29e-08	2.26e-06	5.25e-07	0	1.55e-07	1.51e-06	4.28e-07	0.000116194	2e-06	8.46e-07	2.77e-06
Actinomadura sp. WMMB 499	1.31e-05	3.31e-05	6.74e-07	1.55e-06	0	5.15e-07	3.5e-08	0	0	1.95e-07	0	0.000193656	1.03e-06	3.9e-07	2.77e-06
Actinomadura verrucosospora	1.51e-05	4.18e-05	6.13e-08	3.21e-06	0	5.15e-07	2.8e-07	7.84e-07	0	9.73e-08	0	0.000215025	1.57e-06	3.9e-07	2.7e-06
Actinomarinicola tropica	2.74e-05	6.01e-05	6.13e-08	1.77e-06	0	8.23e-07	3.5e-08	0	1.55e-07	0	2.14e-07	0.000435393	2.91e-06	6.51e-08	3.8e-06
Actinomyces capricornis	4.36e-06	1.39e-05	2.45e-07	0	0	6.17e-07	2.1e-07	0	4.65e-07	0	2.14e-07	3.07e-05	2e-06	2.08e-06	1.67e-06
Actinomyces faecalis	1.59e-06	1.13e-05	0	2.22e-07	0	4.12e-07	0	0	0	4.86e-08	1.07e-07	3.21e-05	2.48e-06	1.3e-07	5.79e-07
Actinomyces israelii	2.38e-06	1.65e-05	2.63e-06	6.65e-07	0	2.06e-07	3.5e-07	1.57e-07	0	0	0	3.47e-05	9.44e-06	6.51e-08	1.03e-06
Actinomyces lilanjuaniae	2.38e-06	5.22e-06	4.23e-06	1.11e-07	0	3.09e-07	1.12e-06	0	1.55e-07	0	0	1.34e-05	6.05e-08	1.19e-05	0
Actinomyces massiliensis	7.54e-06	1.22e-05	6.13e-08	1.11e-07	0	9.26e-07	0	0	0	0	3.21e-07	4.01e-05	4.9e-06	1.3e-07	2.57e-07
Actinomyces naeslundii	5.55e-06	2.18e-05	0	5.54e-07	0	7.2e-07	0	0	0	0	0	3.87e-05	6.05e-07	5.21e-07	3.86e-07
Actinomyces oris	8.33e-06	5.22e-06	0	4.43e-07	0	4.01e-06	0	4.71e-07	0	2.43e-07	1.07e-07	5.61e-05	1.7e-06	2.41e-06	8.36e-07
Actinomyces pacaensis	1.23e-05	2.44e-05	0	1.11e-07	0	5.15e-06	0	0	0	0	1.07e-07	1.34e-05	1.21e-07	0	1.93e-07
Actinomyces procaprae	1.03e-05	2.79e-05	0	1.11e-07	0	2.06e-07	0	0	1.55e-07	0	0	6.41e-05	3.57e-06	0	4.5e-07
Actinomyces qiguomingii	1.15e-05	3.74e-05	1.84e-07	3.32e-07	0	1.75e-06	1.05e-07	1.57e-07	0	9.73e-08	1.07e-07	4.67e-05	6.05e-08	5.21e-07	5.15e-07
Actinomyces radicidentis	3.57e-06	1.04e-05	0	3.32e-07	0	7.2e-07	3.5e-08	0	0	3.41e-07	0	6.94e-05	1.21e-06	1.3e-07	4.5e-07
Actinomyces slackii	5.95e-06	5.22e-06	0	0	0	5.15e-07	0	4.71e-07	1.55e-07	0	2.14e-07	5.61e-05	4.96e-06	6.51e-08	5.15e-07
Actinomyces sp. Chiba101	3.17e-06	9.58e-06	0	3.32e-07	0	8.23e-07	3.5e-08	0	0	1.7e-06	4.71e-06	3.74e-05	6.05e-08	0	3.22e-07
Actinomyces sp. oral taxon 169	3.97e-07	9.58e-06	0	0	0	1.03e-07	0	0	0	0	0	1.74e-05	2.72e-06	2.08e-06	1.93e-07
Actinomyces sp. oral taxon 171	3.97e-07	5.22e-06	0	1.11e-07	0	4.12e-07	7e-08	3.14e-07	0	4.86e-08	0	2.8e-05	5.15e-06	7.16e-07	6.43e-07
Actinomyces sp. oral taxon 414	3.57e-06	6.96e-06	6.13e-08	4.43e-07	0	1.03e-06	0	0	0	3.41e-07	2.14e-07	6.54e-05	3.03e-07	6.51e-08	5.15e-07
Actinoplanes derwentensis	2.42e-05	2e-05	1.59e-06	3.99e-06	0	2.57e-06	9.8e-07	1.25e-06	3.1e-07	0	0	0.000192321	5.27e-06	3.25e-07	2.19e-06
Actinoplanes friuliensis	1.98e-05	4.53e-05	1.23e-07	1.99e-06	0	1.23e-06	1.75e-07	0	0	4.86e-08	4.28e-07	0.000174958	2.36e-06	0	2.57e-06
Actinoplanes ianthinogenes	2.38e-05	7.4e-05	2.51e-06	1.99e-06	0	3.19e-06	7.35e-07	1.57e-07	0	1.7e-06	1.28e-06	0.000133556	4.96e-06	1.11e-06	1.99e-06
Actinoplanes missouriensis	1.59e-05	3.57e-05	7.29e-06	1.44e-06	0	1.23e-06	2.34e-06	6.27e-07	1.55e-07	4.86e-08	1.07e-06	0.000220368	7.02e-06	0	1.87e-06
Actinoplanes sp. L3-i22	2.5e-05	9.4e-05	7.17e-06	2.44e-06	0	2.47e-06	1.96e-06	1.57e-07	1.55e-07	3.41e-07	0	0.000264441	7.57e-06	6.51e-07	3.8e-06
Actinoplanes sp. N902-109	3.29e-05	3.74e-05	2.14e-06	1.99e-06	6.29e-08	9.26e-07	1.12e-06	7.84e-07	5.89e-06	4.38e-07	7.49e-07	0.000186979	3.63e-06	1.3e-07	3.35e-06
Actinoplanes sp. NRRL 3884	1.27e-05	8.97e-05	1.23e-07	2.44e-06	0	1.44e-06	3.15e-07	3.14e-07	1.55e-07	4.86e-07	2.03e-06	0.000145576	2.78e-06	0	3.02e-06
Actinoplanes sp. OR16	2.1e-05	3.74e-05	0	1.77e-06	0	1.03e-06	1.05e-07	3.14e-07	1.55e-07	9.73e-08	1.5e-06	0.000169616	8.48e-07	6.51e-08	4.38e-06
Actinoplanes teichomyceticus	1.07e-05	4.27e-05	2.76e-06	1.11e-06	0	4.12e-07	1.75e-07	3.14e-07	1.55e-07	4.86e-08	9.63e-07	0.000118865	8.78e-06	2.6e-07	2.77e-06
Actinopolymorpha singaporensis	1.03e-05	3.83e-05	1.84e-07	6.65e-07	6.29e-08	4.12e-07	1.4e-07	0	1.55e-07	4.86e-08	4.28e-07	0.000145576	4.12e-06	6.51e-08	1.42e-06
Actinopolyspora erythraea	4.36e-06	1.92e-05	1.04e-06	3.32e-07	0	3.09e-07	0	0	0	0	2.14e-06	6.94e-05	1.94e-06	0	1.42e-06
Actinosynnema mirum	9.13e-06	2.52e-05	0	5.54e-07	7.55e-07	2.06e-07	3.5e-08	1.57e-07	0	0	5.35e-07	0.000101503	3.69e-06	1.3e-07	7.72e-07
Actinosynnema pretiosum	6.75e-06	2.18e-05	0	7.76e-07	6.29e-08	4.12e-07	0	0	0	4.38e-07	8.56e-07	5.21e-05	1.27e-06	6.51e-08	1.54e-06
Actinotalea sp. JY-7876	1.83e-05	2e-05	1.23e-07	1.33e-06	6.29e-08	4.12e-07	1.05e-07	0	1.55e-07	0	4.28e-07	9.08e-05	9.69e-07	6.51e-08	2.77e-06
Acuticoccus sp. I52.16.1	1.75e-05	0.000117531	3.68e-07	1.55e-06	0	1.65e-06	1.85e-06	4.71e-07	1.55e-07	1.95e-07	0	0.000320535	9.44e-06	2.6e-07	3.35e-06
Acuticoccus sp. MNP-M23	1.47e-05	7.05e-05	8.64e-06	1.44e-06	0	1.34e-06	1.05e-07	6.27e-07	6.2e-07	2.43e-07	1.82e-06	0.00020167	1.57e-06	7.81e-07	1.87e-06
Adhaeretor mobilis	6.75e-06	1.57e-05	0	6.65e-07	0	1.23e-06	7e-08	0	0	0	0	0.000112187	5.45e-07	0	4.5e-07
Adhaeribacter radiodurans	3.57e-06	1.83e-05	3.06e-07	4.43e-07	0	2.06e-07	0	3.14e-07	4.96e-06	0	0	4.41e-05	1.63e-06	0	1.8e-06
Adhaeribacter swui	7.94e-06	2.18e-05	1.84e-07	2.22e-07	0	2.06e-07	3.5e-08	0	0	0	0	3.47e-05	4.66e-06	1.95e-06	7.72e-07
Adlercreutzia equolifaciens	1.59e-06	7.75e-05	0	2.22e-07	0	2.06e-07	0	0	0	4.86e-08	0	4.01e-05	2.6e-06	0	5.15e-07
Advenella alkanexedens	6.35e-06	4.09e-05	0	6.65e-07	6.29e-08	2.26e-06	2.1e-07	6.27e-07	5.58e-06	4.86e-08	1.5e-06	3.47e-05	1.82e-06	4.14e-05	9.52e-06
Advenella kashmirensis	1.98e-05	5.83e-05	5.74e-05	2.22e-06	0	3.19e-06	4.2e-07	3.14e-07	3.1e-07	1.26e-06	1.07e-06	7.75e-05	2e-06	9.11e-07	1.57e-05
Advenella mimigardefordensis	2.14e-05	4.7e-05	0	5.32e-06	9.44e-07	2.57e-06	5.6e-07	3.14e-06	4.65e-07	3.41e-07	5.35e-07	5.74e-05	5.33e-06	9.96e-06	2.19e-06
Aegicerativicinus sediminis	1.39e-05	5.57e-05	1.23e-07	4.43e-07	0	1.13e-06	3.5e-08	1.57e-07	9.15e-06	0	1.07e-07	3.61e-05	5.45e-07	2.93e-06	8.36e-07
Aeoliella mucimassa	1.11e-05	1.13e-05	1.47e-06	7.42e-06	0	3.09e-07	4.9e-07	0	0	9.73e-08	1.07e-07	0.000172287	3.39e-06	9.76e-07	5.85e-06
Aequoribacter fuscus	1.98e-06	6.96e-06	0	1.11e-07	2.45e-06	1.13e-06	0	1.57e-07	3.1e-07	3.41e-07	7.49e-07	3.61e-05	3.03e-07	1.3e-07	1.03e-06
Aequorivita sp. Ant34-E75	1.75e-05	0.000178472	3.31e-06	0	0	9.26e-07	3.5e-08	0	4.65e-07	0	2.14e-07	2.67e-05	9.69e-07	5.21e-07	1.42e-06
Aequorivita sp. H23M31	3.41e-05	0.000158449	2.45e-07	0	0	6.17e-07	7e-08	0	2.64e-06	0	5.35e-07	2.4e-05	1.57e-06	6.9e-06	8.36e-07
Aequorivita sublithincola	0.000103956	0.000100989	0	3.32e-07	0	1.65e-06	0	0	4.65e-07	0	1.07e-07	2.67e-05	9.08e-07	4.94e-06	1.61e-06
Aerococcus christensenii	3.17e-06	0.000130589	0	0	0	4.12e-07	0	0	0	0	0	1.2e-05	0	8.52e-06	3.22e-07
Aerococcus urinaeequi	7.94e-07	2.61e-06	5.21e-06	0	0	8.23e-07	1.4e-07	0	0	0	0	1.2e-05	1.82e-07	6.51e-08	2.7e-06
Aeromicrobium chenweiae	1.83e-05	1.22e-05	4.23e-06	1.11e-06	1.26e-07	3.09e-07	2.03e-06	0	0	2.43e-07	7.49e-07	5.61e-05	3.63e-07	0	2.96e-06
Aeromicrobium choanae	6.35e-06	9.58e-06	6.13e-08	7.76e-07	0	5.15e-07	1.05e-07	0	0	0	1.07e-07	7.08e-05	3.21e-06	0	2.25e-06
Aeromicrobium erythreum	4.76e-06	2.18e-05	0	9.97e-07	0	1.75e-06	3.5e-07	0	1.55e-07	0	1.07e-07	9.62e-05	6.05e-07	0	3.67e-06
Aeromicrobium marinum	1.51e-05	2.44e-05	0	8.86e-07	0	3.09e-07	2.45e-07	0	0	9.73e-08	0	0.000156261	6.05e-07	1.24e-06	6.24e-06
Aeromicrobium sp. A1-2	1.98e-05	1.22e-05	0	1.11e-06	0	2.47e-06	1.05e-07	0	0	0	1.07e-07	7.48e-05	3.63e-07	0	2.12e-06
Aeromicrobium sp. HA	5.95e-06	1.65e-05	0	1.33e-06	0	0	0	0	0	8.27e-07	0	6.81e-05	1.15e-06	0	2.38e-06
Aeromicrobium sp. Leaf245	7.14e-06	1.57e-05	1.23e-07	1.77e-06	0	4.12e-07	4.9e-07	0	1.55e-07	0	2.03e-06	6.54e-05	6.66e-07	6.51e-08	2.06e-06
Aeromicrobium sp. zg.Y1379	1.07e-05	2.79e-05	0	3.55e-06	0	9.26e-07	0	0	0	0	1.93e-06	7.08e-05	7.26e-07	1.95e-07	3.22e-06
Aeromicrobium sp. zg.Y50	7.54e-06	1.39e-05	6.13e-08	6.65e-07	1.38e-06	8.23e-07	3.5e-08	1.57e-07	0	0	0	5.74e-05	3.03e-07	0	7.72e-07
Aeromicrobium sp. zg-629	5.95e-06	2.44e-05	0	3.32e-07	0	8.23e-07	0	1.57e-07	1.55e-07	0	5.35e-07	2.94e-05	4.24e-07	0	1.74e-06
Aeromicrobium yanjiei	7.94e-06	1.39e-05	0	2.44e-06	0	4.12e-07	3.5e-08	0	1.55e-07	2.92e-07	1.07e-07	6.14e-05	9.69e-07	0	2.06e-06
Aeromonas allosaccharophila	0.000188866	1.13e-05	0	1.81e-05	5.01e-05	0.00021199	4.87e-05	7.37e-06	2.02e-05	2.61e-05	7.17e-05	4.14e-05	0.00101814	0.0002533	8.11e-06
Aeromonas bestiarum	0.00305837	0.000125366	6.13e-08	0.00029713	0.00938134	0.00872309	0.00403431	0.000397671	0.00154137	6.49e-05	0.00183412	0.000540902	0.0238171	0.00601432	4.44e-06
Aeromonas caviae	0.000257509	2.35e-05	5.51e-07	2.24e-05	0.00012035	0.0011113	0.000191952	2.1e-05	4.59e-05	0.000181398	0.00010189	0.000116194	0.00159114	0.000299561	3.67e-05
Aeromonas dhakensis	0.000492799	5.66e-05	1.41e-06	2.59e-05	0.000267011	0.00104091	0.000191602	2.93e-05	9.55e-05	0.000114511	0.000292933	0.00015359	0.00357965	0.000633022	4.7e-06
Aeromonas encheleia	0.00118557	0.000107083	2.57e-06	0.000260016	0.000272802	0.00591669	0.000556257	6.43e-05	7.02e-05	0.00146033	0.000256437	0.000356595	0.00349695	0.000732572	2e-05
Aeromonas enteropelogenes	0.000201167	1.39e-05	1.16e-06	9.53e-06	7.67e-05	0.000381171	5.68e-05	8.63e-06	2.96e-05	6.54e-05	7.36e-05	9.88e-05	0.00097673	0.000274967	1.93e-06
Aeromonas hydrophila	0.00139864	9.14e-05	6.13e-07	8.21e-05	0.00106949	0.00242791	0.000726616	9.35e-05	0.000277415	0.000281558	0.000740841	0.000466111	0.0102098	0.00198567	1.99e-05
Aeromonas jandaei	0.000217435	1.57e-05	6.13e-08	1.68e-05	9e-05	0.000291024	5.38e-05	1.11e-05	2.08e-05	3.97e-05	8.77e-05	7.21e-05	0.00123057	0.000269176	9.26e-06
Aeromonas media	0.000782447	3.22e-05	2.1e-05	5.09e-05	0.000358155	0.00951548	0.00140161	0.000154362	0.000121262	0.00062003	0.000263501	0.000193656	0.00361518	0.000715004	0.000284897
Aeromonas rivipollensis	8.81e-05	6.96e-06	1.23e-07	1.06e-05	6.2e-05	0.00375212	0.000571165	6.01e-05	1.38e-05	8.63e-05	3.97e-05	2.54e-05	0.00052148	8.84e-05	2.1e-05
Aeromonas rivuli	0.000206722	7.84e-06	5.9e-05	1.4e-05	6.58e-05	0.000652642	7.03e-05	1.18e-05	4.17e-05	0.000129007	7.07e-05	8.15e-05	0.00089809	0.000174701	5.28e-06
Aeromonas salmonicida	0.00898425	0.000331697	7.9e-06	0.000447689	0.00271097	0.0149601	0.00718179	0.000264016	0.000828522	0.000255095	0.00495096	0.00157196	0.0659632	0.0130913	8.27e-05
Aeromonas sanarellii	4.01e-05	8.71e-07	0	2.99e-06	1.27e-05	0.000166505	1.34e-05	2.35e-06	7.29e-06	3.89e-05	1.15e-05	2.27e-05	0.00020571	2.94e-05	9.01e-07
Aeromonas schubertii	8.29e-05	2.44e-05	0	8.09e-06	2.06e-05	0.000227838	1.95e-05	4.86e-06	9.92e-06	4.32e-05	4.23e-05	6.14e-05	0.000306325	0.000137353	1.93e-06
Aeromonas simiae	5.59e-05	9.58e-06	1.23e-07	5.98e-06	3.55e-05	0.000149731	2.02e-05	3.29e-06	6.51e-06	2.83e-05	2.58e-05	8.55e-05	0.000280839	7.49e-05	1.67e-06
Aeromonas sobria	0	0	0	1.11e-07	0	4.94e-06	0	0	5.58e-06	0	9.63e-07	9.35e-06	0	0	9.01e-07
Aeromonas sp.	1.79e-05	0	0	0	0	0	0.000122345	7.84e-07	1.55e-07	0	2.14e-06	0	0	0	4.5e-07
Aeromonas sp. 1805	2.58e-05	8.71e-07	0	1.11e-06	1e-05	4.62e-05	1.36e-05	1.25e-06	6.98e-06	4.67e-06	2.2e-05	9.35e-06	0.000457248	5.82e-05	1.93e-07
Aeromonas sp. 2692-1	1.31e-05	1.74e-06	0	1.44e-06	1.04e-05	3.91e-05	1.91e-05	1.1e-06	2.17e-06	3.79e-06	7.38e-06	9.35e-06	9.28e-05	2.37e-05	5.79e-07
Aeromonas sp. ARM81	0	0	0	0	0	2.06e-06	6.19e-06	0	0	0	0	0	0	0	1.22e-06
Aeromonas sp. ASNIH1	5.55e-06	8.71e-07	0	3.32e-07	6.29e-08	1.08e-05	2.34e-06	7.84e-07	1.55e-07	2.92e-07	7.49e-07	1.34e-06	1.25e-05	2.67e-06	1.29e-07
Aeromonas sp. ASNIH2	2.22e-05	8.71e-07	0	8.86e-07	4.22e-06	1.38e-05	3.99e-06	3.14e-07	6.2e-07	1.75e-06	1.93e-06	1.07e-05	1.64e-05	4.16e-06	1.87e-06
Aeromonas sp. ASNIH3	1.19e-06	0	0	0	2.52e-07	7.51e-06	1.66e-05	0	4.65e-07	2.43e-07	1.07e-07	0	1.82e-07	2.99e-06	8.36e-07
Aeromonas sp. ASNIH4	9.92e-05	1.48e-05	0	5.32e-06	2.31e-05	6.43e-05	8.47e-06	3.98e-05	6.98e-06	3.6e-05	2.08e-05	9.35e-06	0.000503318	9.01e-05	3.28e-06
Aeromonas sp. ASNIH5	2.38e-06	2.61e-06	0	1.11e-07	1.2e-06	3.67e-05	4.72e-06	3.14e-07	3.1e-07	1.7e-06	0	1.34e-06	6.05e-07	3.25e-07	6.43e-07
Aeromonas sp. ASNIH7	5.55e-06	0	0	8.86e-07	0	4.05e-05	7e-07	0	4.65e-07	1.95e-07	5.35e-07	1.34e-06	9.02e-06	2.54e-05	2.57e-07
Aeromonas sp. BC14	1.71e-05	1.74e-06	0	8.86e-07	1.45e-05	3.27e-05	6.37e-06	1.41e-06	1.4e-06	4.43e-06	1.93e-05	1.34e-06	8.14e-05	2.43e-05	3.86e-07
Aeromonas sp. CA23	0.00381939	0.000122754	0	0.000349532	0.00836831	0.0086314	0.00370528	0.000427163	0.00163859	0.0001131	0.00226266	0.000663774	0.0287382	0.00721315	4.25e-06
Aeromonas sp. CU5	0.00031901	1.65e-05	0	1.55e-05	7.28e-05	0.000228353	3.97e-05	8.16e-06	1.85e-05	3.83e-05	0.000119549	6.81e-05	0.00153332	0.000348491	2.96e-06
Aeromonas sp. FDAARGOS 1402	7.94e-06	0	0	0	6.29e-07	1.62e-05	3.64e-06	7.84e-07	1.55e-07	1.65e-06	9.63e-07	0	3.47e-05	2.15e-06	0
Aeromonas sp. FDAARGOS 1403	9.92e-06	0	0	8.86e-07	2.45e-06	2.51e-05	3.74e-06	1.41e-06	1.24e-06	2.09e-06	5.78e-06	1.34e-06	0.000192271	2.32e-05	6.43e-08
Aeromonas sp. FDAARGOS 1404	1.35e-05	0	0	8.86e-07	1.89e-07	1.87e-05	2.55e-06	6.27e-07	1.09e-06	1.65e-06	1.28e-06	9.35e-06	8.41e-05	3.27e-05	1.93e-07
Aeromonas sp. FDAARGOS 1405	3.57e-05	8.71e-07	0	8.86e-07	1.74e-05	3.75e-05	5.81e-06	1.88e-06	3.1e-06	6.76e-06	1.54e-05	8.01e-06	0.000193845	3.64e-05	5.15e-07
Aeromonas sp. FDAARGOS 1406	9.52e-06	0	0	1.11e-07	1.23e-05	1.76e-05	4.65e-06	6.27e-07	3.1e-07	2.19e-05	1.39e-06	2.67e-06	1.81e-05	2.28e-06	4.5e-07
Aeromonas sp. FDAARGOS 1407	2.74e-05	1.74e-06	0	4.32e-06	9.95e-06	4.91e-05	6.65e-06	1.1e-06	2.79e-06	8.76e-06	1.23e-05	1.34e-06	0.000119624	2.45e-05	4.5e-07
Aeromonas sp. FDAARGOS 1408	9.52e-06	0	0	3.32e-07	5.67e-07	1.08e-05	2.45e-06	9.41e-07	7.75e-07	1.22e-06	4.07e-06	1.34e-06	4.09e-05	2.99e-05	0
Aeromonas sp. FDAARGOS 1409	5.08e-05	6.96e-06	0	5.21e-06	9.25e-06	0.000253668	2.12e-05	4.24e-06	7.29e-06	5.27e-05	1.3e-05	2.8e-05	0.00017538	3.6e-05	1.16e-06
Aeromonas sp. FDAARGOS 1410	1.31e-05	8.71e-07	0	3.32e-07	8.75e-06	1.82e-05	3.78e-06	1.25e-06	1.86e-06	2.19e-06	8.03e-06	1.34e-05	0.000100736	2.28e-05	6.43e-08
Aeromonas sp. FDAARGOS 1411	1.07e-05	8.71e-07	0	1.66e-06	1.51e-06	1.27e-05	3.22e-06	7.84e-07	9.3e-07	1.41e-06	4.39e-06	1.2e-05	6.9e-05	1.22e-05	2.57e-07
Aeromonas sp. FDAARGOS 1414	1.07e-05	0	0	6.65e-07	4.09e-06	1.78e-05	3.08e-06	4.71e-07	1.55e-06	8.76e-07	3.85e-06	1.34e-06	0.000160609	8.52e-06	0
Aeromonas sp. FDAARGOS 1415	0.000115462	1.39e-05	0	7.42e-06	4.63e-05	0.000577622	5.08e-05	5.33e-06	8.37e-06	0.000127791	4.16e-05	3.61e-05	0.000507616	9.12e-05	2.06e-06
Aeromonas sp. FDAARGOS 1416	1.23e-05	0	0	1.11e-06	5.22e-06	1.76e-05	7.94e-06	7.84e-07	9.3e-07	4.86e-06	7.92e-06	0	5.5e-05	2.37e-05	1.93e-07
Aeromonas sp. FDAARGOS 1417	2.22e-05	8.71e-07	0	9.97e-07	4.22e-06	1.97e-05	3.99e-06	4.71e-07	2.48e-06	1.17e-06	5.57e-06	9.35e-06	8.36e-05	3.15e-05	3.22e-07
Aeromonas sp. FDAARGOS 1418	5.95e-06	0	0	2.22e-07	2.71e-06	1.08e-05	2.76e-06	0	3.1e-07	1.56e-06	8.56e-07	4.01e-06	1.45e-05	2.21e-06	3.22e-07
Aeromonas sp. FDAARGOS 1419	7.94e-06	9.58e-06	0	6.65e-07	5.29e-06	1.56e-05	2.97e-06	1.57e-07	4.65e-07	2.43e-06	3.53e-06	2.67e-06	6.25e-05	2.17e-05	1.19e-05
Aeromonas sp. WP2-W18-CRE-05	5.95e-06	0	0	1.11e-07	2.08e-06	1.09e-05	6.65e-07	0	1.55e-07	8.76e-07	2.14e-07	6.68e-06	4.06e-06	1.24e-06	1.22e-06
Aeromonas veronii	0.00120264	0.000138425	1.24e-05	7.26e-05	0.00039246	0.0015148	0.00086513	7.36e-05	0.000151345	0.000206012	0.000566494	0.000396662	0.00863807	0.00161551	4.87e-05
Aerosticca soli	1.39e-05	1.74e-05	2.14e-06	7.76e-07	0	6.17e-07	1.47e-06	1.1e-06	0	9.73e-07	1.39e-06	0.000138898	1.51e-06	6.51e-08	8.36e-06
Aestuariibaculum sp. YM273	6.35e-05	0.000195884	0	1.77e-06	0	3.19e-06	1.05e-07	1.57e-07	4.34e-06	0	1.07e-06	1.74e-05	9.69e-07	3.58e-06	9.65e-07
Aestuariispira ectoiniformans	2.22e-05	2e-05	0	7.76e-07	1.26e-07	8.23e-07	4.55e-07	9.57e-06	1.55e-07	3.89e-07	7.49e-07	0.000126878	4.06e-06	1.17e-06	6.43e-07
Afipia carboxidovorans	1.67e-05	0.00027685	0	2.44e-06	0	7.2e-07	7e-08	5.49e-06	1.55e-07	0	2.14e-07	0.000467446	1.39e-06	6.51e-07	1.67e-06
Afipia sp. GAS231	6.75e-05	0.000463157	1.84e-07	6.65e-07	0	1.13e-06	1.4e-07	0	4.65e-07	2.43e-07	3.21e-07	0.000826712	7.87e-06	5.21e-07	3.99e-06
Agarilytica rhodophyticola	6.35e-06	1.13e-05	0	5.54e-07	2.58e-06	1.96e-06	9.8e-07	6.27e-07	3.26e-06	0	5.35e-07	5.08e-05	6.05e-08	1.95e-07	5.79e-07
Agarivorans aestuarii	5.16e-06	8.71e-06	0	5.54e-06	4.15e-06	2.68e-06	6.65e-07	1.73e-06	2.33e-06	9.73e-08	1.82e-06	1.87e-05	3.03e-07	5.79e-06	1.93e-07
Agarivorans gilvus	2.78e-06	6.09e-06	6.13e-08	4.43e-07	1.32e-05	2.98e-06	1.4e-06	7.84e-07	1.33e-05	4.86e-08	4.28e-07	3.21e-05	4.24e-07	1.33e-05	1.93e-07
Agarivorans sp. TSD2052	6.75e-06	1.74e-06	0	8.86e-07	9.57e-06	2.16e-06	3.5e-08	6.27e-07	3.72e-06	0	1.07e-07	1.6e-05	3.03e-07	3.06e-06	2.44e-06
Agathobacter rectalis	4.76e-06	6.96e-06	6.74e-07	0	0	1.03e-07	7e-08	1.57e-07	0	0	3.21e-07	2.67e-05	1.03e-06	5.21e-07	5.13e-05
Aggregatibacter actinomycetemcomitans	3.57e-06	8.71e-06	3.68e-07	4.54e-06	1.26e-07	3.09e-06	7e-08	2.51e-06	1.4e-05	9.73e-08	1.28e-06	6.28e-05	7.26e-07	2.4e-05	5.79e-07
Aggregatibacter aphrophilus	2.78e-06	8.71e-06	3.61e-06	2.22e-06	6.29e-08	3.5e-06	7e-08	4.08e-06	1.02e-05	0	4.28e-07	2.67e-05	4.96e-06	2.63e-05	1.29e-07
Aggregatibacter sp. 2125159857	1.59e-06	6.09e-06	0	2.99e-06	0	2.37e-06	7e-08	1.88e-06	4.5e-06	3.41e-07	4.28e-07	5.34e-06	4.24e-07	1.3e-07	3.41e-06
Aggregatibacter sp. Marseille-P9115	7.94e-07	7.84e-06	0	0	1.26e-07	5.15e-07	1.75e-07	2.2e-06	1.86e-06	0	0	1.34e-06	7.26e-07	4.88e-06	1.69e-05
Aggregatibacter sp. oral taxon 513	7.94e-07	8.71e-07	2.22e-05	2.22e-07	0	7.2e-07	3.5e-08	4.71e-07	9.3e-07	1.46e-07	1.07e-07	9.35e-06	6.05e-08	0	0
Aggregatimonas sangjinii	3.49e-05	0.000154966	6.13e-08	0	0	7.2e-07	1.05e-07	4.71e-07	3.72e-06	0	0	3.47e-05	7.26e-07	0	7.72e-07
Agreia sp. COWG	3.61e-05	9.66e-05	0	9.31e-06	0	7.92e-06	1.75e-07	0	0	0	0	0.000129549	1.76e-06	0	2.15e-05
Agrobacterium cucumeris	3.97e-06	1.48e-05	0	0	0	6.17e-07	2.8e-07	3.14e-06	0	2.19e-06	4.28e-07	3.61e-05	4.24e-07	2.49e-05	9.65e-07
Agrobacterium fabacearum	0.000295203	9.05e-05	2.45e-07	2.77e-06	1.26e-07	1.75e-06	5.95e-07	6.12e-06	0	3.41e-07	1.28e-06	0.000104174	6.66e-07	9.76e-07	1.61e-06
Agrobacterium fabrum	1.19e-05	7.14e-05	0	1.44e-06	0	1.96e-06	1.57e-06	2.35e-05	1.4e-06	4.86e-08	0	4.94e-05	1.94e-06	6.51e-08	1.61e-06
Agrobacterium larrymoorei	1.98e-05	0.000158449	0	3.99e-06	0	2.78e-06	1.29e-06	4.35e-05	1.09e-06	1.46e-06	1.39e-06	0.000132221	9.08e-07	2.13e-05	2.06e-06
Agrobacterium leguminum	5.55e-06	7.84e-06	0	5.54e-07	0	6.17e-07	6.3e-07	5.96e-06	1.55e-07	0	0	3.87e-05	2.42e-07	1.95e-07	6.43e-07
Agrobacterium pusense	1.27e-05	9.4e-05	6.13e-08	4.43e-06	0	1.65e-06	2.31e-06	9.88e-06	1.09e-05	1.95e-07	6.74e-06	6.14e-05	4e-06	3.9e-07	2.51e-06
Agrobacterium rubi	9.92e-06	0.000214167	0	1.98e-05	0	4.43e-06	5.6e-07	5.02e-06	1.24e-06	0	0	9.35e-05	4.84e-07	6.51e-07	2.51e-06
Agrobacterium salinitolerans	1.31e-05	0.000183696	0	2.22e-06	6.29e-08	1.03e-06	3.85e-07	3.61e-06	4.65e-07	1.95e-07	5.35e-07	3.47e-05	4.24e-07	9.11e-07	2.9e-06
Agrobacterium sp. CGMCC 11546	2.78e-06	7.49e-05	0	0	6.29e-08	1.03e-07	0	1.57e-07	0	0	1.71e-06	6.68e-06	0	1.3e-07	0
Agrobacterium sp. MA01	2.38e-06	2.35e-05	0	1.33e-06	0	1.03e-07	3.5e-08	4.71e-07	9.3e-07	0	0	2.8e-05	6.48e-06	0	5.15e-07
Agrobacterium sp. RAC06	1.98e-06	3.4e-05	0	4.43e-07	0	0	2.45e-07	2.67e-06	0	0	1.07e-07	2.4e-05	4.24e-07	6.51e-08	1.93e-07
Agrobacterium tumefaciens	8.45e-05	0.000941985	4.29e-07	7.53e-06	2.27e-06	1.32e-05	4.2e-06	5.95e-05	4.65e-06	1.02e-06	8.67e-06	0.00057162	1.25e-05	4.29e-06	1.76e-05
Agrobacterium vaccinii	1.63e-05	0.000338662	6.13e-07	2.2e-05	0	6.48e-06	1.19e-06	2.31e-05	1.09e-06	4.86e-08	5.35e-07	0.000114858	1.51e-06	3.9e-07	4.38e-06
Agrobacterium vitis	1.98e-05	0.000199367	0	7.87e-06	4.41e-07	1.13e-06	1.85e-06	3.84e-05	1.55e-07	3.89e-07	4.28e-06	0.000137563	2.24e-06	1.56e-06	1.99e-06
Agrococcus carbonis	9.52e-06	2.44e-05	3.68e-07	5.54e-07	0	3.09e-07	7e-08	0	0	1.65e-06	2.14e-07	5.21e-05	5.45e-07	0	6.43e-06
Agrococcus jejuensis	2.34e-05	3.31e-05	0	3.88e-06	0	1.96e-06	1.05e-07	0	0	0	1.07e-07	8.55e-05	3.27e-06	6.51e-08	4.83e-06
Agrococcus sp. Marseille-Q4369	6.35e-06	1.13e-05	0	7.76e-07	0	1.03e-07	4.55e-07	0	0	0	0	6.94e-05	2.42e-07	0	4.57e-06
Agrococcus sp. REN33	1.07e-05	1.92e-05	0	1.44e-06	0	8.23e-07	4.2e-07	1.57e-07	0	1.95e-07	2.14e-07	6.14e-05	2.42e-06	0	6.88e-06
Agrococcus sp. SCSIO52902	1.27e-05	2.09e-05	0	1.44e-06	0	1.85e-06	1.4e-07	0	0	9.73e-07	0	7.08e-05	9.08e-07	0	1.1e-05
Agrococcus sp. SGAir0287	6.75e-06	1.22e-05	1.23e-07	2.33e-06	0	5.15e-07	0	0	3.1e-07	0	2.14e-07	8.41e-05	4.24e-07	0	4.12e-06
Agrococcus sp. SL85	7.94e-06	2.26e-05	6.13e-08	7.76e-07	0	8.23e-07	3.5e-08	6.27e-07	1.55e-07	4.86e-08	2.14e-07	7.48e-05	7.26e-07	6.51e-08	3.47e-06
Agromyces archimandritae	1.35e-05	3.22e-05	6.13e-08	4.43e-07	0	1.65e-06	7e-08	0	4.65e-07	1.95e-07	0	5.08e-05	1.09e-06	6.51e-08	2.57e-06
Agromyces aureus	3.49e-05	3.57e-05	6.13e-08	1.11e-06	0	1.96e-06	1.05e-07	4.71e-07	0	0	0	0.000104174	1.03e-06	0	4.05e-06
Agromyces badenianii	2.02e-05	3.92e-05	6.13e-08	5.54e-07	0	1.75e-06	2.8e-07	0	0	0	1.07e-07	6.28e-05	7.87e-07	1.95e-07	1.99e-06
Agromyces flavus	2.14e-05	1.92e-05	0	3.32e-07	0	2.88e-06	1.05e-07	1.57e-07	0	0	0	6.54e-05	3.03e-07	3.9e-07	2.19e-06
Agromyces intestinalis	1.83e-05	3.13e-05	0	6.65e-07	0	1.13e-06	1.75e-07	1.57e-07	1.55e-07	0	3.21e-07	6.28e-05	1.7e-06	0	1.29e-06
Agromyces laixinhei	1.63e-05	3.22e-05	0	7.76e-07	0	1.85e-06	1.01e-06	0	0	0	3.21e-07	5.21e-05	3.03e-07	6.51e-08	2.32e-06
Agromyces larvae	2.1e-05	2.61e-05	1.84e-07	9.97e-07	1.26e-07	1.23e-06	0	0	0	0	1.07e-07	7.35e-05	3.03e-07	6.51e-08	1.87e-06
Agromyces mangrovi	1.67e-05	1.83e-05	1.72e-06	6.65e-07	0	1.75e-06	3.85e-07	0	0	4.86e-08	1.07e-07	8.15e-05	1.15e-06	0	2.06e-06
Agromyces marinus	1.47e-05	4.27e-05	0	4.43e-07	0	1.03e-06	2.1e-07	0	0	0	0	4.27e-05	1.82e-07	6.51e-08	1.61e-06
Agromyces protaetiae	4.32e-05	7.4e-05	6.13e-08	1.55e-06	0	2.88e-06	2.1e-07	0	1.55e-07	0	0	0.000132221	5.93e-06	6.51e-08	5.02e-06
Agromyces soli	2.74e-05	1.92e-05	7.96e-06	1.66e-06	0	8.23e-07	4.41e-06	3.14e-07	0	4.86e-08	1.07e-07	8.68e-05	1.03e-06	0	2.96e-06
Agromyces sp. H17E-10	2.66e-05	3.66e-05	6.13e-08	1.44e-06	0	1.34e-06	1.75e-07	0	1.55e-07	0	3.21e-07	0.000110852	1.39e-06	1.95e-07	2.44e-06
Agromyces sp. LHK192	1.79e-05	2.35e-05	0	2.44e-06	0	5.76e-06	7e-08	0	0	0	6.53e-06	7.08e-05	1.21e-06	0	2.19e-06
Ahniella affigens	1.35e-05	2e-05	5.45e-06	2.77e-06	0	4.84e-06	1.85e-06	4.71e-07	1.55e-07	1.95e-07	6.42e-07	0.000176294	1.39e-06	4.55e-07	1.87e-06
Akkermansia glycaniphila	1.59e-06	1.22e-05	0	1.33e-06	0	2.06e-07	3.5e-08	0	0	4.86e-08	0	9.08e-05	7.26e-07	4.55e-07	3.22e-07
Akkermansia muciniphila	2.1e-05	1.57e-05	1.23e-07	0	6.29e-08	9.26e-07	1.05e-07	3.29e-06	1.55e-07	2.92e-07	4.28e-07	0.000212354	1.82e-07	1.3e-07	2.26e-05
Alcaligenes aquatilis	5.95e-06	2.79e-05	0	7.76e-07	0	1.75e-06	3.43e-05	1.13e-05	1.86e-06	3.41e-06	4.05e-05	0.000110852	1.15e-06	2.6e-07	1.99e-06
Alcaligenes faecalis	5.04e-05	0.000173249	4.51e-05	8.53e-06	6.29e-08	1.89e-05	0.000414	8.47e-06	3.26e-06	1.02e-06	0.000484511	0.000235059	1.11e-05	2.73e-06	5.98e-06
Alcaligenes sp. 1735tsa3	3.57e-06	8.71e-07	0	2.22e-07	0	1.54e-06	5.49e-06	0	0	0	7.06e-06	1.34e-06	0	3.25e-07	1.29e-07
Alcaligenes sp. NLF5-7	7.94e-07	8.71e-06	0	3.32e-07	0	3.09e-07	5.18e-06	0	0	0	8.56e-06	6.68e-06	2.36e-06	0	1.29e-07
Alcaligenes sp. SMD-FA	1.19e-06	1.13e-05	0	0	0	0	2.34e-06	0	0	0	5.78e-06	2.14e-05	7.69e-06	1.11e-06	0
Alcaligenes sp. SORT26	1.15e-05	2.96e-05	6.13e-08	9.97e-07	2.52e-07	5.66e-06	0.000377394	3.29e-06	0	1.46e-07	0.000471026	5.34e-05	4.42e-06	4.88e-06	4.38e-06
Alcanivorax sp.	1.31e-05	2.52e-05	1.29e-06	5.1e-06	9.44e-07	3.6e-06	1.45e-05	8e-06	8.36e-05	3.89e-07	1.61e-06	0.000156261	5.33e-06	1.24e-06	5.66e-06
Algibacter luteus	4.96e-05	0.00043791	0	0	0	2.26e-06	0	0	1.24e-06	0	4.28e-07	1.6e-05	1.09e-06	7.94e-06	1.09e-06
Algibacter sp. L1A34	6.27e-05	0.000188049	1.23e-07	5.54e-07	0	1.96e-06	0	9.41e-07	4.96e-06	0	2.14e-07	2.8e-05	8.48e-07	3.12e-06	2.7e-06
Algibacter sp. L3A6	4.32e-05	0.000114919	0	3.32e-07	0	1.44e-06	0	1.57e-07	3.72e-06	0	5.35e-07	2.27e-05	1.57e-06	1.51e-05	1.67e-06
Algicella marina	3.97e-06	4.27e-05	6.13e-08	6.65e-07	0	9.26e-07	2.1e-07	1.15e-05	0	0	0	9.35e-05	4.66e-06	0	1.29e-06
Algoriphagus machipongonensis	7.54e-06	8.62e-05	0	2.22e-07	0	6.17e-07	3.5e-08	0	0	0	0	2.8e-05	7.87e-07	7.74e-06	3.86e-07
Algoriphagus sanaruensis	2.58e-05	0.00016106	0	2.22e-07	0	4.12e-07	0	4.71e-07	2.02e-06	0	0	2.4e-05	4.84e-07	7.81e-07	1.93e-07
Algoriphagus sp. NBT04N3	1.55e-05	2.18e-05	0	0	0	3.09e-07	1.05e-07	0	0	0	4.28e-07	3.47e-05	3.63e-07	5.01e-06	7.72e-07
Algoriphagus sp. Y33	3.57e-06	1.31e-05	3e-06	3.32e-07	0	6.17e-07	1.05e-07	4.71e-07	0	0	1.07e-07	4.94e-05	6.66e-07	1.1e-05	1.99e-06
Aliamphritea ceti	1.59e-06	1.74e-06	0	5.1e-06	4.41e-07	2.16e-06	1.75e-07	6.27e-07	1.49e-05	1.02e-06	1.82e-06	3.21e-05	1.21e-07	3.56e-05	7.08e-07
Aliamphritea hakodatensis	3.17e-06	1.92e-05	2.76e-06	1.88e-06	0	6.17e-07	7e-07	5.49e-06	7.75e-07	2.92e-07	5.35e-07	2.67e-05	7.26e-07	1.5e-06	3.02e-06
Aliarcobacter butzleri	4.8e-05	4.27e-05	0	6.65e-07	6.29e-08	2.15e-05	3.5e-08	1.57e-07	1.55e-07	0	0	3.21e-05	4.84e-07	0	4.14e-05
Aliarcobacter cibarius	4.76e-06	1.57e-05	0	4.43e-07	0	6.48e-06	0	0	0	0	0	1.74e-05	1.21e-07	2.54e-06	6.95e-06
Aliarcobacter cryaerophilus	5.95e-06	2.87e-05	1.84e-07	1.44e-06	0	1.7e-05	0	1.57e-07	0	0	4.28e-07	2.27e-05	3.63e-07	0	0.000112981
Aliarcobacter faecis	1.19e-06	7.84e-06	3.74e-05	0	6.29e-08	5.87e-06	7e-08	0	0	0	1.07e-07	1.74e-05	1.21e-07	0	2.83e-06
Aliarcobacter lanthieri	7.94e-07	1.65e-05	4.25e-05	2.22e-07	0	5.97e-06	0	0	0	0	0	2e-05	1.21e-07	0	2.19e-06
Aliarcobacter skirrowii	1.19e-06	1.13e-05	0	2.22e-07	0	3.6e-06	0	0	1.55e-07	0	0	1.6e-05	0	0	4.63e-06
Aliarcobacter trophiarum	7.94e-07	5.22e-06	0	2.22e-07	0	4.73e-06	0	1.57e-07	4.65e-07	0	1.07e-07	8.01e-06	0	0	2.44e-06
Alicycliphilus denitrificans	0.000176566	0.000508428	2.51e-06	8.31e-06	0	3.05e-05	1.75e-06	1.1e-06	7.75e-07	2.77e-06	4.6e-06	0.000470117	1.51e-05	2.6e-07	6.59e-05
Alicyclobacillus acidocaldarius	6.75e-06	0.000181955	0	4.43e-07	0	6.17e-07	3.5e-08	3.14e-07	3.1e-07	4.86e-08	0	0.000146912	7.87e-07	3.25e-07	7.08e-07
Alicyclobacillus fastidiosus	5.16e-06	1.83e-05	3.74e-06	3.32e-07	1.64e-06	6.17e-07	1.4e-07	0	3.1e-07	0	0	9.62e-05	1.21e-06	6.51e-08	3.22e-07
Alicyclobacillus sp. ALC3	1.19e-06	2.61e-06	0	2.22e-07	0	0	1.15e-06	0	0	0	4.28e-07	6.14e-05	1.76e-06	0	4.5e-07
Alicyclobacillus sp. SO9	1.59e-06	1.74e-05	0	3.32e-07	6.29e-07	5.15e-07	0	0	0	0	0	2.4e-05	1.21e-07	4.88e-06	1.29e-07
Alienimonas californiensis	7.94e-06	3.13e-05	0	9.97e-07	0	1.13e-06	1.05e-07	1.57e-07	6.2e-07	4.86e-08	1.07e-07	0.000264441	1.18e-05	6.51e-08	1.61e-06
Aliiglaciecola sp. LCG003	3.97e-07	6.96e-06	6.13e-08	2.22e-07	1.76e-06	3.4e-06	3.5e-08	7.84e-07	7.29e-06	0	1.07e-07	3.34e-05	2.42e-07	4.68e-06	7.08e-07
Aliiroseovarius crassostreae	3.37e-05	0.000226355	6.13e-08	1.66e-06	0	8.23e-07	3.85e-07	1.69e-05	1.55e-07	4.86e-07	1.61e-06	7.75e-05	8.48e-07	6.18e-06	2.7e-06
Aliiroseovarius sp. M344	1.15e-05	8.71e-05	0	1.11e-07	0	3.09e-07	2.8e-07	7.84e-07	0	0	5.35e-07	5.61e-05	3.15e-06	2.6e-06	1.29e-06
Aliivibrio fischeri	1.39e-05	2.87e-05	3.19e-06	6.43e-06	6.61e-06	2.68e-06	1.05e-07	2.98e-06	5.12e-05	1.46e-06	1.93e-06	4.14e-05	9.69e-07	1.44e-05	2.57e-07
Aliivibrio salmonicida	1.59e-06	5.22e-06	5.32e-05	1.11e-07	4.72e-06	3.09e-06	7e-08	7.84e-07	1.75e-05	0	3.21e-07	2e-05	5.45e-07	7.16e-07	3.86e-07
Alistipes communis	4.36e-06	8.71e-06	6.13e-08	0	1.89e-07	2.06e-07	0	0	0	0	2.14e-07	8.55e-05	6.05e-07	6.51e-08	6.5e-06
Alistipes finegoldii	2.78e-06	1.74e-05	0	0	0	1.03e-07	7e-08	0	0	0	0	5.08e-05	6.05e-08	0	4.63e-06
Alistipes ihumii	1.98e-06	1.04e-05	0	4.87e-06	0	0	3.5e-08	0	0	0	0	6.94e-05	7.87e-07	0	2.77e-06
Alistipes indistinctus	3.57e-06	1.83e-05	6.13e-08	3.32e-07	0	6.17e-07	3.5e-08	0	0	0	5.35e-07	5.74e-05	4.84e-07	0	2.77e-06
Alistipes megaguti	2.78e-06	1.22e-05	0	0	0	0	3.5e-08	3.29e-06	0	0	0	4.14e-05	6.05e-08	6.51e-08	2.64e-06
Alistipes onderdonkii	1.98e-06	7.84e-06	0	4.43e-06	0	1.03e-07	0	1.57e-07	1.55e-07	0	0	5.48e-05	3.63e-07	0	2.43e-05
Alistipes senegalensis	3.57e-06	4.35e-06	0	0	0	4.12e-07	3.5e-08	0	0	0	0	4.81e-05	1.15e-06	6.51e-08	1.67e-06
Alistipes shahii	4.76e-06	7.84e-06	0	3.32e-07	0	5.15e-07	0	0	6.2e-07	0	0	5.21e-05	1.21e-07	0	3.92e-06
Alistipes sp. dk3624	8.33e-06	5.31e-05	0	2.22e-07	0	3.09e-07	3.5e-08	0	9.3e-07	0	2.14e-07	8.15e-05	3.03e-07	1.3e-07	3.22e-07
Alkalicella caledoniensis	1.19e-06	3.48e-06	4.8e-05	2.22e-07	0	4.12e-07	0	0	0	0	0	3.07e-05	1.21e-07	0	1.29e-07
Alkaliflexus sp. Ai-910	2.38e-06	1.04e-05	0	0	0	3.09e-07	0	4.71e-07	1.69e-05	0	3.21e-07	3.21e-05	4.24e-07	0	1.93e-06
Alkalihalobacillus sp. LMS6	3.97e-07	8.71e-06	3.36e-05	4.43e-07	0	1.03e-06	0	0	6.2e-07	5.35e-07	4.28e-07	9.35e-06	0	1.3e-07	1.29e-07
Alkalihalophilus pseudofirmus	3.97e-07	6.09e-06	5.07e-05	0	0	4.12e-07	0	0	0	4.86e-08	1.07e-07	1.47e-05	3.03e-07	1.95e-07	6.43e-08
Alkalilimnicola ehrlichii	8.33e-06	1.92e-05	1.23e-07	1.33e-06	5.73e-06	1.44e-06	4.2e-07	0	1.09e-06	9.73e-08	8.56e-07	0.000168281	1.09e-06	8.46e-07	1.93e-06
Alkalimarinus alittae	1.19e-06	8.71e-06	1.9e-05	1.22e-06	2.52e-07	9.26e-07	8.4e-07	9.41e-07	2.5e-05	1.22e-06	8.56e-07	3.21e-05	1.21e-07	6.51e-08	4.63e-06
Alkalimarinus coralli	5.95e-06	1.48e-05	0	8.2e-06	0	1.85e-06	2.45e-07	2.04e-06	1.36e-05	1.46e-07	4.28e-07	4.01e-05	8.48e-07	3.77e-06	2.9e-06
Alkalimarinus sediminis	4.76e-06	5.22e-06	2.63e-06	6.65e-07	0	2.88e-06	1.4e-07	7.69e-06	1.55e-07	0	0	3.21e-05	2.42e-07	2.6e-07	1.93e-07
Alkaliphilus metalliredigens	6.75e-06	1.57e-05	3.03e-05	1.11e-07	2.77e-06	3.09e-07	1.4e-07	0	1.09e-06	0	0	2.67e-05	3.03e-07	0	4.89e-06
Alkalitalea saponilacus	5.87e-05	3.83e-05	0	2.22e-07	0	2.57e-06	7e-08	0	7.75e-07	0	0	2.94e-05	2.06e-06	3.25e-07	3.86e-07
Alloacidobacterium dinghuense	5.16e-06	9.58e-06	0	2.22e-07	0	3.09e-07	3.5e-08	1.57e-07	1.55e-07	0	0	0.000224374	7.87e-07	6.51e-08	4.5e-07
Alloactinosynnema sp. L-07	4.76e-06	1.83e-05	6.13e-08	3.21e-06	7.55e-07	6.17e-07	7e-08	1.57e-07	1.55e-07	9.73e-08	4.28e-07	0.000146912	3.21e-06	1.3e-07	2.64e-06
Alloalcanivorax dieselolei	8.73e-06	1.48e-05	6.13e-08	8.86e-07	0	1.54e-06	4.2e-07	1.57e-07	3.1e-07	1.17e-06	2.35e-06	5.21e-05	1.03e-06	2.6e-07	9.01e-07
Alloalcanivorax xenomutans	3.97e-06	1.22e-05	1.84e-07	1.22e-06	0	1.65e-06	7e-08	3.14e-07	4.65e-07	4.38e-07	0	7.21e-05	5.09e-06	1.69e-06	7.08e-07
Allobranchiibius sp. GilTou73	9.13e-06	6.18e-05	2.82e-06	8.86e-07	0	5.15e-07	7.35e-07	0	0	0	0	8.01e-05	3.03e-07	0	2.19e-06
Allochromatium tepidum	7.14e-06	1.22e-05	1.23e-07	1.11e-06	0	3.09e-07	0	7.84e-07	1.55e-07	9.73e-08	1.07e-07	0.000101503	5.93e-06	3.9e-07	1.74e-06
Allochromatium vinosum	1.03e-05	6.09e-06	3.43e-06	1.11e-06	0	1.13e-06	8.4e-07	6.75e-06	3.1e-07	4.86e-08	0	0.00017763	9.44e-06	1.04e-06	1.48e-06
Allocoleopsis franciscana	7.94e-07	8.71e-06	0	4.43e-07	0	4.12e-07	0	0	1.55e-07	0	0	3.61e-05	3.21e-06	6.51e-08	7.72e-07
Allokutzneria albata	8.73e-06	2.7e-05	6.13e-08	1.11e-06	0	8.23e-07	1.75e-07	9.41e-07	0	3.89e-07	2.57e-06	0.000144241	1.03e-06	1.82e-06	8.75e-06
Allomeiothermus silvanus	5.16e-06	3.48e-06	0	0	0	5.15e-07	0	0	0	0	2.14e-07	7.48e-05	3.03e-07	4.55e-07	5.79e-07
Allomuricauda aurantiaca	5.55e-06	0.000177602	0	0	1.32e-06	5.15e-07	0	1.57e-07	2.02e-06	0	0	2.67e-05	9.08e-07	0	2.57e-07
Allomuricauda lutaonensis	1.67e-05	9.23e-05	0	1.11e-07	0	1.03e-06	0	3.14e-07	7.75e-07	0	1.07e-07	1.6e-05	5.45e-07	6.51e-08	3.86e-07
Allomuricauda oceani	2.22e-05	2.09e-05	0	1.11e-07	0	8.23e-07	7e-08	0	0	0	0	2.54e-05	4.24e-07	6.51e-08	2.57e-07
Allomuricauda ruestringensis	1.07e-05	0.000142778	0	2.22e-07	0	8.23e-07	0	0	1.55e-06	0	0	2.14e-05	5.45e-07	2.54e-06	3.86e-07
Allomuricauda sp.	1.86e-05	9.66e-05	0	2.22e-07	0	5.15e-07	3.5e-08	0	0	0	1.07e-07	2.14e-05	1.33e-06	2.6e-07	6.43e-07
Allorhizobium ampelinum	6.75e-06	0.000243767	3.19e-06	4.21e-06	0	9.26e-07	2.06e-06	2.1e-05	1.55e-07	0	2.35e-06	8.81e-05	2.12e-06	0	9.01e-07
Allorhizobium pseudoryzae	2.46e-05	0.000147131	0	1.11e-06	0	8.23e-07	1.05e-07	3.45e-06	0	9.73e-08	3e-06	0.000134892	2.42e-06	0	1.16e-06
Allosaccharopolyspora coralli	1.51e-05	4.61e-05	0	2.22e-07	2.27e-06	1.03e-07	6.51e-06	0	0	4.86e-08	3.21e-07	8.15e-05	2.06e-06	1.95e-07	1.54e-06
Allosphingosinicella indica	2.5e-05	2.18e-05	3.19e-06	1.22e-06	0	9.26e-07	5.6e-07	3.14e-07	4.65e-07	1.46e-07	6.42e-07	0.000178965	9.69e-07	1.3e-07	4.25e-06
Alloyangia pacifica	1.47e-05	4.44e-05	0	6.65e-07	0	1.13e-06	0	0	0	0	1.07e-07	0.000116194	9.69e-07	6.51e-08	1.42e-06
Altererythrobacter epoxidivorans	1.86e-05	6.27e-05	0	1.11e-07	0	5.15e-07	1.4e-07	0	3.1e-07	9.73e-08	7.49e-07	3.74e-05	7.87e-07	1.3e-07	1.93e-06
Altererythrobacter ishigakiensis	9.52e-06	1.83e-05	0	2.22e-07	6.29e-08	1.03e-07	3.5e-08	0	0	0	1.07e-07	5.48e-05	1.82e-07	0	1.42e-06
Altererythrobacter rubellus	3.97e-06	1.13e-05	0	0	2.01e-06	3.09e-07	0	4.71e-07	0	6.81e-07	0	5.08e-05	6.05e-07	0	4.95e-06
Altererythrobacter sp. B11	4.92e-05	4e-05	1.35e-06	5.54e-07	0	2.47e-06	1.89e-06	0	0	0	0	0.000129549	7.87e-07	2.6e-07	2.51e-06
Altererythrobacter sp. BO-6	2.54e-05	4.09e-05	0	9.97e-07	0	3.09e-07	0	0	0	0	0	9.62e-05	9.69e-07	0	2.44e-06
Altererythrobacter sp. CAU 1644	3.21e-05	0.000104472	0	3.32e-07	0	5.15e-07	3.85e-07	6.27e-07	0	1.95e-07	0	0.000101503	4.84e-07	0	1.87e-06
Altererythrobacter sp. TH136	3.77e-05	3.13e-05	1.23e-07	4.21e-06	0	6.17e-07	3.5e-08	3.14e-07	0	1.46e-07	4.28e-07	0.000124207	3.03e-07	6.51e-07	1.22e-05
Altererythrobacter sp. ZODW24	1.51e-05	5.4e-05	0	3.32e-07	0	1.03e-06	3.5e-08	4.71e-07	1.55e-07	2.43e-07	0	7.61e-05	4.96e-06	3.9e-07	2.25e-06
Alteromonas macleodii	1.35e-05	5.57e-05	6.13e-08	3.32e-06	6.92e-06	5.04e-06	1.57e-06	1.41e-06	1.49e-05	4.86e-08	3.53e-06	6.14e-05	2.36e-06	4.67e-05	3.57e-05
Alteromonas mediterranea	7.54e-06	3.48e-06	1.23e-07	3.21e-06	8.62e-06	5.87e-06	3.85e-07	4.71e-07	4.65e-07	1.46e-07	2.25e-06	3.74e-05	4.36e-06	2.93e-06	4.7e-06
Alteromonas pelagimontana	1.19e-06	3.66e-05	7.17e-06	2.22e-07	6.29e-08	2.68e-06	7.35e-07	4.71e-06	2.95e-06	7.78e-07	1.07e-07	2.27e-05	3.15e-06	1.5e-06	1.29e-07
Alteromonas sp. 76-1	1.19e-06	5.22e-06	3.86e-05	1.11e-07	3.46e-06	6.17e-07	2.45e-07	3.14e-07	1.86e-06	0	3.21e-07	1.74e-05	0	6.51e-08	1.29e-07
Alteromonas sp. BL110	9.52e-06	1.13e-05	0	2.88e-06	1.07e-06	1.34e-06	3.5e-08	3.14e-07	3.1e-07	4.86e-08	0	1.47e-05	1.21e-07	6.51e-08	0
Alteromonas sp. LMIT006	6.35e-06	1.74e-06	9.19e-07	6.65e-07	4.15e-06	5.15e-07	3.5e-08	1.57e-07	2.02e-06	0	0	1.87e-05	6.05e-08	9.3e-06	1.09e-06
Alteromonas sp. RKMC-009	3.57e-06	2.61e-06	1.27e-05	4.43e-07	2.33e-06	3.6e-06	2.69e-06	2.51e-06	6.67e-06	1.46e-07	1.07e-07	2e-05	2.42e-07	4.1e-06	6.43e-08
Alysiella crassa	3.17e-06	1.74e-05	0	7.64e-06	6.29e-08	2.26e-06	3.5e-08	4.71e-07	1.55e-06	0	1.07e-07	2.8e-05	1.82e-07	1.76e-06	4.5e-07
Alysiella filiformis	2.78e-06	7.31e-05	3e-06	3.32e-07	0	9.26e-07	0	1.57e-07	3.1e-07	2.43e-07	2.14e-07	3.34e-05	4.24e-07	1.3e-07	3.22e-07
Aminobacter sp. MSH1	1.39e-05	0.000176731	6.13e-08	2.1e-06	0	7.2e-07	8.4e-07	1.22e-05	1.55e-07	1.51e-06	4.28e-07	0.000160267	1.15e-06	6.51e-08	3.67e-06
Aminobacter sp. SR38	4.76e-06	1.74e-06	0	2.22e-07	0	4.12e-07	3.15e-07	6.27e-07	1.09e-06	0	1.07e-07	2.94e-05	8.48e-06	0	5.15e-07
Aminomonas paucivorans	1.98e-06	1.39e-05	0	0	5.04e-07	1.03e-07	3.5e-08	0	0	0	2.14e-07	7.88e-05	6.05e-08	0	6.43e-07
Amniculibacterium sp. G2-70	2.18e-05	3.92e-05	0	1.11e-07	0	7.2e-07	1.05e-07	0	1.55e-07	0	3.21e-07	2e-05	6.66e-07	2.08e-06	5.79e-07
Amphibacillus xylanus	1.98e-06	4.35e-06	4.66e-05	0	0	7.2e-07	7e-08	0	4.65e-07	0	0	2.14e-05	0	0	3.86e-07
Amphritea atlantica	5.16e-06	4.35e-06	0	5.1e-06	8.18e-07	3.6e-06	2.06e-06	2.2e-06	2.02e-06	8.76e-07	9.63e-07	2.54e-05	6.05e-08	2.54e-06	2.83e-06
Amphritea japonica	1.67e-05	1.57e-05	2.45e-07	5.43e-06	3.08e-06	1.96e-06	1.47e-06	9.41e-07	1.86e-06	4.86e-08	9.63e-07	2.94e-05	3.63e-07	1.24e-06	7.08e-07
Amycolatopsis acidiphila	1.11e-05	2.7e-05	6.13e-08	2.44e-06	0	2.16e-06	1.75e-07	7.84e-07	0	4.38e-07	1.18e-06	0.000208348	1.82e-06	1.95e-07	2.96e-06
Amycolatopsis aidingensis	5.95e-06	2.96e-05	1.23e-07	1.22e-06	5.04e-07	8.23e-07	2.45e-07	2.98e-06	0	9.73e-08	0	0.000134892	9.02e-06	0	2.57e-06
Amycolatopsis albispora	5.16e-06	1.74e-05	6.13e-08	9.97e-07	0	2.26e-06	6.3e-07	1.41e-06	7.75e-07	7.3e-07	1.07e-07	0.000105509	1.21e-06	6.51e-08	1.8e-06
Amycolatopsis keratiniphila	1.07e-05	2.7e-05	4.29e-07	6.65e-07	0	1.23e-06	1.4e-07	0	1.55e-07	1.46e-07	2.14e-07	9.62e-05	3.51e-06	3.25e-07	9.01e-07
Amycolatopsis mediterranei	9.52e-06	5.4e-05	1.23e-07	4.43e-07	0	1.23e-06	2.45e-07	1.88e-06	1.55e-07	1.07e-06	8.24e-06	9.88e-05	4.84e-07	1.3e-07	1.8e-06
Amycolatopsis methanolica	6.75e-06	2.26e-05	7.96e-07	8.86e-07	0	8.23e-07	5.25e-07	1.57e-07	4.65e-07	0	2.14e-07	0.000118865	1.51e-06	6.51e-08	1.99e-06
Amycolatopsis orientalis	2.78e-06	1.74e-05	0	6.65e-07	0	8.23e-07	0	1.57e-07	7.75e-07	9.73e-08	4.28e-07	8.68e-05	3.15e-06	6.51e-07	9.65e-07
Amycolatopsis pretoriensis	1.59e-05	3.22e-05	0	2.22e-07	0	8.23e-07	0	1.41e-06	9.3e-07	4.86e-08	2.14e-07	0.000150918	2.54e-06	0	2.64e-06
Amycolatopsis roodepoortensis	3.97e-06	7.84e-06	1.23e-07	3.32e-07	0	3.09e-07	0	0	0	2.92e-07	0	6.54e-05	4.84e-07	0	6.43e-07
Amycolatopsis sp. 2-15	7.54e-06	1.92e-05	1.23e-07	1.22e-06	0	7.2e-07	7e-08	0	1.55e-07	8.27e-07	8.56e-07	7.48e-05	7.14e-06	6.51e-08	5.53e-06
Amycolatopsis sp. 2-2	8.33e-06	3.48e-05	1.84e-07	4.43e-07	1.89e-07	1.03e-07	1.05e-07	4.71e-07	0	0	3.21e-07	0.000134892	1.03e-06	1.95e-07	2.38e-06
Amycolatopsis sp. 4-36	1.67e-05	4.79e-05	0	1.22e-06	0	1.34e-06	3.85e-07	4.71e-07	0	2.38e-06	7.49e-07	0.000150918	3.69e-06	0	1.8e-06
Amycolatopsis sp. AA4	4.36e-06	2.18e-05	0	5.54e-07	0	1.34e-06	0	4.71e-07	0	3.89e-07	9.63e-07	7.48e-05	1.88e-06	0	7.08e-07
Amycolatopsis sp. BJA-103	7.14e-06	1.92e-05	8.58e-07	2.55e-06	0	2.68e-06	7.35e-07	0	0	2.43e-07	1.07e-07	0.000100167	3.63e-07	5.21e-07	9.01e-07
Amycolatopsis sp. CA-230715	8.73e-06	4.09e-05	0	9.97e-07	0	1.03e-06	3.5e-08	1.57e-07	0	1.95e-07	4.28e-07	0.000116194	5.33e-06	8.72e-06	3.8e-06
Amycolatopsis sp. DG1A-15b	7.14e-06	1.39e-05	1.23e-06	3.32e-07	0	1.03e-06	1.05e-07	0	1.55e-07	4.86e-08	1.07e-07	0.000116194	3.51e-06	1.95e-07	1.22e-06
Amycolatopsis sp. DSM 110486	1.03e-05	2.44e-05	8.82e-06	1.55e-06	6.29e-08	9.26e-07	1.2e-05	0	1.55e-07	2.43e-07	2.14e-07	0.000141569	2.78e-06	0	3.28e-06
Amycolatopsis sp. EV170708-02-1	3.97e-06	7.84e-06	0	1.11e-07	0	1.03e-06	0	1.57e-07	0	0	5.35e-07	4.54e-05	2.12e-06	0	1.28e-05
Amycolatopsis sp. FDAARGOS 1241	1.71e-05	3.4e-05	1.84e-07	1.11e-06	0	1.13e-06	2.1e-07	3.14e-07	0	1.46e-07	2.14e-07	0.000134892	1.09e-06	7.81e-07	2.12e-06
Amycolatopsis sp. FU40	1.35e-05	2.96e-05	6.13e-08	3.32e-07	0	9.26e-07	3.5e-08	1.57e-07	9.3e-07	0	1.82e-06	0.000164274	5.39e-06	1.69e-06	2.9e-06
Amycolatopsis sp. Hca4	8.33e-06	1.65e-05	1.84e-07	6.65e-07	6.29e-08	9.26e-07	6.3e-07	2.04e-06	1.55e-07	4.86e-08	5.35e-07	0.000121536	1.45e-06	8.46e-07	1.35e-06
Amycolatopsis sp. HUAS 11-8	1.19e-05	3.92e-05	2.45e-06	1.11e-06	0	1.23e-06	1.05e-07	4.71e-07	1.55e-07	0	3.21e-07	0.000110852	5.27e-06	1.3e-06	2.32e-06
Amycolatopsis sp. QT-25	3.57e-06	1.13e-05	0	1.11e-06	0	1.03e-07	3.5e-08	0	0	3.41e-07	4.28e-07	7.35e-05	2.42e-06	0	1.42e-06
Amycolatopsis sp. TNS106	3.57e-06	1.39e-05	6.13e-08	2.22e-07	0	5.15e-07	3.5e-08	0	1.55e-07	1.65e-06	5.35e-07	6.54e-05	4.84e-07	4.55e-07	9.01e-07
Amycolatopsis sp. WQ 127309	1.27e-05	4e-05	2.45e-07	2.44e-06	0	9.26e-07	2.1e-07	0	3.1e-07	9.73e-08	1.39e-06	0.000161603	8.9e-06	6.51e-08	2.51e-06
Amycolatopsis sp. YIM 10	1.67e-05	4.61e-05	6.62e-06	1.55e-06	0	5.35e-06	8.4e-07	0	0	5.35e-07	7.49e-07	0.000125543	8.11e-06	6.51e-08	1.29e-06
Amycolatopsis thermalba	1.19e-05	3.05e-05	1.84e-07	1.11e-06	0	7.2e-07	1.4e-07	0	1.55e-07	1.46e-07	0	0.000112187	1.15e-06	3.25e-07	2.64e-06
Amylibacter sp. IMCC11727	1.27e-05	6.09e-06	0	1.11e-07	0	3.09e-07	1.4e-07	6.27e-07	6.2e-07	2.43e-07	5.35e-07	3.47e-05	2.42e-07	3.25e-07	5.15e-07
Anabaena cylindrica	2.34e-05	1.22e-05	0	6.65e-07	0	0	0	0	3.1e-07	0	0	1.34e-05	7.08e-05	0	1.93e-07
Anabaena sp. 90	0	2.61e-06	0	1.13e-05	0	7.2e-07	0	0	0	0	0	5.34e-06	8.98e-05	0	1.29e-07
Anabaena sp. WA102	3.97e-07	1.65e-05	0	3.88e-06	0	0	0	0	0	0	0	9.35e-06	8.66e-05	0	1.29e-07
Anabaenopsis circularis	1.19e-06	1.92e-05	1.23e-07	1.11e-07	0	0	0	0	0	0	0	2.14e-05	6.72e-06	0	1.29e-07
Anabaenopsis elenkinii	3.09e-05	6.96e-06	0	2.22e-07	0	2.06e-07	0	0	0	4.38e-07	1.07e-07	1.74e-05	7.81e-06	0	6.43e-08
Anaerobutyricum hallii	1.35e-05	1.83e-05	7.35e-06	4.43e-07	6.29e-08	4.12e-07	0	0	1.55e-07	0	1.07e-07	4.01e-05	1.82e-07	5.21e-07	5.21e-06
Anaerococcus sp. Marseille-Q7828	3.57e-06	9.23e-05	0	0	0	0	0	1.57e-07	0	0	0	5.34e-06	3.63e-07	0	1.29e-07
Anaerocolumna chitinilytica	7.94e-07	9.58e-06	0	0	0	1.03e-07	0	0	0	4.86e-08	0	2.8e-05	2.42e-07	1.39e-05	3.86e-07
Anaerocolumna sedimenticola	1.59e-06	8.62e-05	0	0	0	1.03e-07	0	1.57e-07	0	0	0	3.21e-05	2.42e-07	0	1.93e-07
Anaerolinea thermophila	5.16e-06	4.35e-06	6.13e-08	0	0	4.12e-07	0	0	1.55e-07	0	3.21e-07	0.000205676	4.24e-07	0	5.15e-07
Anaeromyxobacter dehalogenans	1.43e-05	4.53e-05	1.23e-07	2.44e-06	1.26e-07	1.13e-06	3.5e-08	0	7.75e-07	4.86e-08	1.07e-07	0.00138097	7.81e-06	1.95e-07	2.38e-06
Anaeromyxobacter oryzae	1.63e-05	6.36e-05	6.13e-08	1.88e-06	0	8.23e-07	0	1.57e-07	0	6.32e-07	0	0.00182304	5.15e-06	3.25e-07	2.44e-06
Anaeromyxobacter paludicola	1.83e-05	4.96e-05	9.8e-07	1.66e-06	0	9.26e-07	3.5e-08	3.14e-07	0	0	1.18e-06	0.00334959	8.41e-06	6.51e-07	1.99e-06
Anaeromyxobacter sp. Fw109-5	2.74e-05	9.92e-05	3.98e-06	8.86e-07	0	7.2e-07	1.4e-06	0	0	4.86e-08	1.07e-07	0.00185776	5.69e-06	5.86e-07	3.09e-06
Anaeromyxobacter sp. K	5.55e-06	2.35e-05	0	4.43e-07	6.29e-08	0	0	0	0	0	0	0.000387313	3.63e-07	6.51e-08	2.57e-07
Anaerostipes hadrus	6.75e-06	1.39e-05	6.13e-08	8.86e-07	0	0	0	0	0	0	1.07e-07	2.94e-05	2.42e-07	0	4.25e-06
Anaerotruncus colihominis	2.38e-06	1.92e-05	0	2.1e-06	0	2.06e-07	1.54e-06	0	1.55e-07	1.95e-07	1.39e-06	7.48e-05	1.82e-07	6.51e-07	7.72e-07
Anaplasma platys	0	2.61e-06	5.26e-05	1.11e-07	0	5.15e-07	0	1.57e-07	0	0	0	1.2e-05	1.21e-07	0	6.43e-08
Anatilimnocola aggregata	1.55e-05	2.18e-05	0	1.11e-06	0	3.09e-07	2.45e-07	0	0	4.86e-08	0	0.000303172	1.82e-06	1.3e-07	2.77e-06
Ancylobacter polymorphus	2.9e-05	0.00074436	4.29e-07	2.22e-06	0	1.75e-06	6.65e-07	2.2e-06	3.1e-07	9.73e-08	1.39e-06	0.000283139	1.63e-06	6.51e-08	3.8e-06
Ancylobacter pratisalsi	2.14e-05	0.000804431	6.74e-07	1.33e-06	6.29e-08	4.12e-07	5.25e-07	0	3.1e-07	4.86e-08	0	0.00026177	2.54e-06	0	1.8e-06
Ancylobacter sp. SL191	1.47e-05	0.000309932	6.13e-08	8.86e-07	0	1.34e-06	0	6.27e-07	1.09e-06	2.82e-06	3.64e-06	0.000166945	1.09e-06	2.6e-07	1.03e-06
Ancylobacter sp. TS-1	1.39e-05	0.000184566	1.84e-07	1.33e-06	0	1.03e-06	2.1e-07	3.14e-07	4.65e-07	6.32e-07	3.21e-07	0.000217696	2.97e-06	1.95e-07	2.51e-06
Ancylobacter sp. WKF20	1.03e-05	7.23e-05	0	8.86e-07	6.29e-08	9.26e-07	2.8e-07	4.08e-06	0	4.86e-08	5.35e-07	0.000193656	9.08e-07	6.51e-08	5.66e-06
Aneurinibacillus sp. Ricciae_BoGa-3	3.97e-07	4.35e-06	3.51e-05	0	0	0	0	0	0	0	0	2.94e-05	0	6.51e-08	2.44e-06
Anoxybacillus flavithermus	1.98e-06	4.09e-05	0	0	1.26e-06	1.03e-07	0	0	0	0	0	2.54e-05	1.82e-07	0	3.86e-07
Anoxybacter fermentans	2.38e-06	2.96e-05	0	0	2.52e-07	0	7e-08	1.57e-07	3.57e-06	0	0	5.21e-05	1.82e-07	0	6.43e-08
Anseongella ginsenosidimutans	3.06e-05	1.65e-05	0	2.22e-07	0	7.2e-07	0	0	1.71e-06	1.95e-07	4.28e-07	5.21e-05	8.48e-07	0	3.86e-07
Antarcticibacterium arcticum	2.58e-05	0.000163672	0	2.22e-07	0	8.23e-07	0	0	1.47e-05	0	0	2.27e-05	1.15e-06	6.51e-08	5.79e-07
Antarcticibacterium flavum	3.97e-06	2.52e-05	0	2.22e-07	0	2.06e-07	1.4e-07	1.57e-07	5.27e-06	0	1.07e-07	1.87e-05	1.15e-06	1.24e-06	9.01e-07
Antarcticibacterium sp. 1MA-6-2	1.27e-05	0.00018979	0	4.43e-07	0	7.2e-07	3.5e-08	3.14e-07	6.2e-07	2.92e-07	0	2e-05	9.69e-07	9.76e-07	2.57e-07
Antarctobacter heliothermus	1.86e-05	1.92e-05	0	1.22e-06	0	4.12e-07	3.5e-07	1.57e-07	3.1e-07	0	7.49e-07	6.28e-05	2.24e-06	5.6e-06	1.61e-06
Anthocerotibacter panamensis	0.000101972	7.84e-06	0	8.86e-07	0	1.03e-07	0	0	0	0	0	6.14e-05	3.15e-06	1.3e-07	3.86e-07
Apibacter raozihei	7.14e-06	2.26e-05	3.8e-06	0	0	6.17e-07	3.5e-08	3.14e-07	2.48e-06	0	1.07e-07	1.74e-05	1.82e-07	5.4e-06	3.22e-07
Apilactobacillus apinorum	1.98e-06	8.53e-05	0	0	0	1.03e-07	0	0	0	2.43e-07	0	8.01e-06	0	0	1.29e-07
Aquabacter sp. L1I39	1.51e-05	0.000313415	6.13e-08	3.88e-06	0	2.98e-06	2.45e-07	4.71e-06	6.2e-07	2.92e-07	1.07e-07	0.00030985	6.05e-06	6.51e-08	3.54e-06
Aquabacterium olei	0.000116653	0.000315156	0	7.42e-06	1.07e-06	1.58e-05	3.85e-07	1.57e-07	1.55e-07	3.89e-07	2.46e-06	0.000490151	1.77e-05	1.5e-06	7.79e-05
Aquabacterium sp. J223	9.48e-05	0.000304709	1.23e-07	8.64e-06	0	1.06e-05	3.5e-07	7.84e-07	1.09e-06	3.41e-07	2.89e-06	0.000722539	4.65e-05	7.81e-07	8.59e-05
Aquaspirillum sp. LM1	1.71e-05	6.96e-05	0	5.32e-06	6.29e-08	8.23e-06	1.05e-07	1.1e-06	7.75e-07	1.53e-05	1.71e-06	0.000145576	9.5e-06	1.24e-05	2.38e-05
Aquella oligotrophica	5.95e-06	8.71e-06	1.52e-05	1.11e-07	0	7.2e-07	0	0	9.3e-07	0	1.07e-07	6.01e-05	4.84e-07	1.3e-07	3.28e-06
Aquibium microcysteis	1.79e-05	0.000120142	1.23e-07	2.22e-06	0	1.13e-06	3.5e-08	0	0	9.73e-08	1.07e-07	0.000253757	1.94e-06	5.21e-07	5.73e-06
Aquibium oceanicum	2.18e-05	0.000105342	0	7.76e-07	0	2.68e-06	2.03e-06	5.16e-05	1.55e-07	0	5.35e-07	0.000235059	1.63e-06	0	2.96e-06
Aquicella lusitana	9.92e-06	1.22e-05	0	3.32e-07	6.29e-08	3.09e-07	0	0	0	0	1.07e-07	0.000205676	1.03e-06	3.25e-07	5.15e-07
Aquicella siphonis	8.33e-06	6.09e-06	0	1.11e-07	0	1.54e-06	7e-08	0	0	0	3.21e-07	0.000233723	6.05e-07	5.86e-07	8.36e-07
Aquiflexum balticum	3.02e-05	9.58e-05	6.13e-08	4.43e-07	0	1.03e-06	7e-08	0	0	0	3.21e-07	2.94e-05	1.21e-06	7.16e-07	9.01e-07
Aquihabitans sp. G128	4.88e-05	0.000154966	0	8.31e-06	0	1.65e-06	1.05e-07	0	3.1e-07	1.46e-07	1.07e-07	0.000467446	4.78e-06	2.6e-07	1.42e-05
Aquiluna borgnonia	0.000163473	0.000628571	6.13e-08	1.77e-06	0	5.29e-05	1.12e-06	0	0	0	0	9.35e-06	2.42e-06	1.43e-06	0
Aquiluna sp. KACHI24	0.000227354	0.000854055	0	1.55e-06	0	0.000110626	3.5e-08	3.14e-07	0	0	0	2e-05	5.33e-06	1.95e-07	3.86e-07
Aquimarina sp. AD1	4.01e-05	9.84e-05	0	0	0	3.09e-07	2.1e-07	3.14e-07	3.57e-06	0	1.07e-07	1.07e-05	4.84e-07	1.3e-07	1.03e-06
Aquimarina sp. AD10	9.05e-05	0.00011666	3.06e-07	5.54e-07	0	2.78e-06	0	9.41e-07	1.5e-05	0	2.14e-07	4.01e-05	1.03e-06	5.21e-07	1.16e-06
Aquimarina sp. Aq107	2.14e-05	0.00010273	1.23e-07	2.22e-07	0	3.09e-07	7e-08	0	2.17e-06	0	0	1.2e-05	9.69e-07	7.81e-06	5.15e-07
Aquimarina sp. BL5	2.34e-05	0.000143648	0	5.54e-07	0	1.75e-06	3.5e-08	0	9.3e-07	0	1.07e-07	2.54e-05	2.24e-06	2.73e-06	1.48e-06
Aquimarina sp. ERC-38	4.88e-05	0.000130589	1.84e-07	0	0	1.34e-06	0	0	3.1e-07	0	0	2e-05	1.27e-06	9.11e-07	8.36e-07
Aquimarina sp. TRL1	3.93e-05	0.000111436	3.68e-07	0	9.44e-07	2.06e-06	1.05e-07	1.57e-07	7.75e-07	0	2.14e-07	3.07e-05	7.26e-07	6.44e-06	1.42e-06
Aquincola tertiaricarbonis	0.00020077	0.000541511	6.13e-08	1.66e-05	0	1.98e-05	1.75e-06	3.14e-07	7.75e-07	2.92e-07	2.57e-06	0.000972288	6.92e-05	9.76e-07	0.000185234
Aquirhabdus parva	3.17e-06	6.09e-06	0	5.32e-06	2.52e-07	3.91e-06	3.64e-06	8.31e-06	1.09e-05	4.86e-08	3.21e-07	4.94e-05	4.84e-07	1.3e-07	2.99e-05
Aquirufa antheringensis	1.98e-05	0.0135796	0	1.41e-05	0	8.23e-07	0	0	1.09e-06	0	0	1.07e-05	0.000105761	8.91e-06	1.61e-06
Aquirufa lenticrescens	1.11e-05	0.0184915	0	1.13e-05	6.29e-08	6.17e-07	7e-08	0	7.75e-07	0	0	3.07e-05	0.000128523	6.51e-08	8.36e-07
Aquirufa nivalisilvae	6.43e-05	0.000447487	0	8.86e-07	0	1.54e-06	0	0	7.75e-07	0	0	5.61e-05	1.14e-05	0	4.7e-06
Aquisalimonas sp. 2447	7.94e-06	2.09e-05	2.02e-06	9.97e-07	0	7.2e-07	7.35e-07	4.71e-07	7.75e-07	1.95e-07	9.63e-07	0.000176294	4.18e-06	5.21e-07	2.06e-06
Aquisalinus flavus	1.03e-05	0.000133201	7.78e-06	6.65e-07	0	9.26e-07	3.22e-06	0	0	9.73e-08	0	0.000129549	4.24e-07	0	6.43e-07
Aquisediminimonas profunda	1.11e-05	2.96e-05	6.13e-08	4.43e-07	0	3.09e-07	0	6.27e-07	0	9.73e-08	1.07e-07	9.75e-05	4.6e-06	6.51e-08	2.25e-06
Aquisphaera giovannonii	2.22e-05	9.4e-05	0	1.44e-06	0	3.4e-06	3.5e-08	4.71e-07	3.1e-07	3.89e-07	2.14e-07	0.000671787	9.69e-06	3.9e-07	4.89e-06
Aquitalea aquatilis	0.00221958	0.000117531	0	4.65e-06	0	2.68e-06	8.75e-07	2.51e-06	1.55e-07	2.43e-07	4.71e-06	0.000101503	1.39e-05	7.16e-06	3.99e-06
Aquitalea denitrificans	0.00017617	1.92e-05	1.84e-07	3.1e-06	8.18e-07	3.29e-06	1.08e-06	1.41e-06	1.55e-07	4.86e-07	1.71e-06	6.94e-05	3.21e-06	9.37e-06	6.88e-06
Aquitalea magnusonii	0.000174979	1.83e-05	2.7e-06	1.55e-06	6.29e-08	2.88e-06	9.55e-06	4.71e-07	9.3e-07	1.22e-06	5.35e-07	7.75e-05	1.42e-05	8.91e-06	5.4e-06
Aquitalea sp. USM4	0.000134905	8.71e-06	1.23e-07	1.11e-06	2.08e-06	4.01e-06	1.61e-06	1.25e-06	3.1e-07	9.73e-07	2.46e-06	6.14e-05	3.33e-06	7.03e-06	3.6e-06
Arabiibacter massiliensis	3.57e-06	6.96e-06	4.23e-06	5.54e-07	0	1.03e-07	9.45e-07	0	9.3e-07	4.38e-07	3.96e-06	5.21e-05	2.42e-07	0	4.5e-07
Arachidicoccus soli	1.31e-05	7.23e-05	0	2.22e-07	0	9.26e-07	5.6e-07	0	1.55e-07	0	1.07e-07	0.000101503	1.39e-06	1.2e-05	1.93e-07
Arachidicoccus sp. B3-10	1.75e-05	0.000104472	6.13e-08	5.54e-07	0	5.15e-07	0	0	1.55e-06	0	0	5.08e-05	7.87e-07	3.9e-07	7.72e-07
Arachidicoccus sp. BS20	9.13e-06	3.31e-05	5.04e-05	4.43e-07	0	3.09e-07	0	0	3.1e-07	0	3.21e-07	6.81e-05	7.87e-07	5.21e-07	1.29e-06
Arachidicoccus terrestris	9.13e-06	3.74e-05	0	0	0	8.23e-07	0	0	3.1e-07	0	1.07e-07	4.81e-05	7.26e-07	0	7.08e-07
Arachnia propionica	8.73e-06	1.31e-05	0	2.22e-07	6.29e-08	7.2e-07	2.1e-07	0	0	0	5.35e-07	6.68e-05	3.63e-07	5.86e-07	1.29e-06
Arcanobacterium canis	6.75e-06	2.79e-05	0	1.11e-07	0	5.04e-06	0	1.57e-07	0	0	0	1.6e-05	2.42e-07	0	1.93e-07
Arcanobacterium haemolyticum	7.94e-06	6.01e-05	0	0	0	3.29e-06	0	3.14e-07	0	0	0	2.54e-05	6.05e-08	6.51e-08	5.79e-07
Arcanobacterium phocisimile	1.39e-05	3.92e-05	0	2.22e-07	0	4.12e-07	0	0	1.86e-06	0	0	1.07e-05	6.05e-08	6.51e-08	6.43e-08
Archangium gephyra	1.47e-05	1.92e-05	6.13e-08	1.77e-06	0	1.13e-06	4.9e-07	0	0	4.38e-07	3.21e-07	0.000474124	6.66e-06	1.43e-06	2.38e-06
Archangium violaceum	3.17e-05	7.57e-05	6.13e-08	1.88e-06	6.29e-08	3.4e-06	1.12e-06	6.75e-06	1.24e-06	7.3e-07	2.25e-06	0.00100701	1.26e-05	3.12e-06	5.66e-06
Arcobacter acticola	8.73e-06	6.36e-05	6.13e-08	3.32e-07	0	3.93e-05	7e-08	0	1.24e-06	0	0	1.87e-05	4.24e-07	1.24e-06	2.14e-05
Arcobacter aquimarinus	6.35e-06	2.7e-05	0	3.32e-07	0	1.66e-05	0	0	0	0	0	1.07e-05	0	0	1.64e-05
Arcobacter cloacae	4.76e-06	2.87e-05	0	0	0	2.81e-05	3.5e-08	1.57e-07	3.26e-06	0	0	8.01e-06	1.82e-07	0	1.28e-05
Arcobacter defluvii	1.19e-06	6.96e-06	0	1.11e-07	0	6.38e-06	0	0	0	0	0	2.67e-06	1.21e-07	0	1.93e-06
Arcobacter ellisii	6.75e-06	4.53e-05	6.13e-08	6.65e-07	0	3.41e-05	3.5e-07	0	1.55e-07	0	1.07e-07	2.54e-05	6.05e-08	0	1.2e-05
Arcobacter nitrofigilis	3.97e-06	2.87e-05	0	1.11e-07	0	8.03e-06	0	0	1.55e-07	0	0	2.67e-05	1.82e-07	6.51e-08	1.8e-06
Arcobacter porcinus	7.94e-07	1.04e-05	0	1.11e-07	0	3.6e-06	7e-08	4.71e-07	4.65e-07	0	0	6.68e-06	0	0	2.77e-06
Arcobacter roscoffensis	3.97e-06	2.18e-05	0	2.22e-07	0	9.26e-06	0	0	0	0	1.07e-07	2e-05	4.24e-07	1.56e-06	2.38e-06
Arcobacter suis	3.33e-05	0.000157578	0	1.66e-06	0	0.000152818	0	1.57e-07	1.4e-06	0	0	3.87e-05	7.26e-07	0	0.000161043
Arcobacter venerupis	2.22e-05	0.000103601	0	4.43e-07	0	8.4e-05	0	0	1.55e-07	0	0	1.87e-05	1.82e-07	0	3.59e-05
Arcticibacterium luteifluviistationis	1.07e-05	0.000123625	0	1.11e-07	0	3.09e-07	8.75e-07	1.25e-06	1.09e-06	0	0	3.87e-05	1.82e-07	0	6.43e-07
Arenibacter algicola	1.27e-05	8.62e-05	6.13e-08	3.32e-07	1.64e-06	2.06e-07	3.5e-08	0	7.75e-07	0	4.28e-07	3.74e-05	8.48e-07	4.49e-06	6.43e-07
Arenimonas daejeonensis	3.61e-05	6.96e-06	1.92e-05	5.65e-06	0	2.78e-06	7.59e-06	1.25e-06	3.1e-07	1.26e-06	1.5e-06	0.000138898	4e-06	6.51e-08	2.76e-05
Aristaeella hokkaidonensis	2.38e-06	5.4e-05	0	3.32e-07	0	8.23e-07	0	0	1.55e-07	0	0	3.21e-05	0	0	6.43e-07
Aristaeella lactis	1.59e-06	5.22e-06	0	1.22e-06	2.77e-06	1.03e-07	0	0	1.55e-07	0	1.61e-06	5.74e-05	5.51e-06	0	6.43e-08
Aromatoleum aromaticum	1.59e-05	0.000141907	1.23e-07	1.44e-06	0	3.5e-06	3.5e-07	0	6.2e-07	3.89e-07	1.07e-06	0.000293823	6.9e-06	5.86e-07	1.96e-05
Aromatoleum bremense	1.47e-05	8.44e-05	0	4.43e-07	0	1.34e-06	1.4e-07	0	0	1.95e-07	1.07e-07	0.00022571	3.03e-06	1.3e-07	1.28e-05
Aromatoleum petrolei	2.22e-05	7.05e-05	1.59e-06	3.66e-06	1.26e-07	3.19e-06	7e-08	9.41e-07	4.65e-07	6.32e-07	2.35e-06	0.000325877	5.09e-06	1.82e-06	9.91e-06
Arsenicicoccus sp. oral taxon 190	1.03e-05	3.05e-05	0	9.97e-07	0	1.54e-06	0	0	0	0	1.07e-07	0.000124207	1.51e-06	2.6e-07	4.18e-06
Arsenophonus apicola	5.55e-06	5.22e-06	1.84e-07	1.42e-05	3.15e-07	7.51e-06	7e-08	7.06e-06	9.88e-05	4.86e-08	2.57e-06	2.4e-05	6.48e-06	2.58e-05	3.22e-07
Arsenophonus endosymbiont of Aleurodicus dispersus	7.94e-07	1.74e-06	0	2.22e-07	0	1.44e-06	0	9.41e-07	1.07e-05	4.86e-08	3.21e-07	1.6e-05	1.82e-07	1.95e-07	0
Arsenophonus endosymbiont of Aphis craccivora	3.97e-06	2.61e-06	1.84e-07	7.31e-06	3.78e-07	4.12e-06	3.5e-07	2.82e-06	2.82e-05	3.89e-07	7.92e-06	3.07e-05	2e-06	1.31e-05	3.86e-07
Arsenophonus nasoniae	3.57e-06	3.13e-05	2.45e-07	4.54e-06	7.55e-07	4.32e-06	1.05e-07	7.06e-06	3.66e-05	3.41e-07	2.25e-06	2.14e-05	7.87e-07	1.76e-05	1.35e-06
Arsenophonus sp. aPb	3.97e-07	2.61e-06	0	7.42e-06	1.83e-06	2.26e-06	1.4e-07	1.88e-06	2.79e-05	1.31e-06	1.93e-06	1.34e-05	6.9e-06	6.38e-06	1.29e-07
Arthrobacter agilis	1.23e-05	3.92e-05	6.13e-08	1.11e-06	0	1.44e-06	9.45e-07	1.57e-07	0	3.41e-07	1.07e-07	9.75e-05	8.05e-06	1.3e-06	3.1e-05
Arthrobacter alpinus	5.99e-05	0.000132331	4.66e-06	1.44e-06	1.13e-06	1.13e-05	3.71e-06	6.27e-07	1.55e-07	2.09e-06	5.35e-07	4.67e-05	2.18e-06	6.51e-08	6.31e-06
Arthrobacter antioxidans	1.71e-05	1.48e-05	6.13e-08	2.22e-07	0	1.54e-06	7e-08	0	1.55e-07	0	0	5.34e-05	1.03e-06	0	1.04e-05
Arthrobacter caoxuetaonis	3.17e-06	3.57e-05	1.23e-07	1.11e-07	0	1.85e-06	4.55e-07	0	0	0	0	2.54e-05	7.26e-07	4.55e-06	9.01e-07
Arthrobacter citreus	2.38e-06	1.39e-05	6.13e-08	1.11e-07	0	5.15e-07	9.1e-07	0	1.55e-07	9.73e-08	9.63e-07	2.4e-05	4.24e-07	0	1.48e-06
Arthrobacter crystallopoietes	1.35e-05	9.66e-05	3e-06	1.11e-06	6.29e-07	8.03e-06	3.43e-06	1.88e-06	4.65e-07	9.73e-08	0	9.08e-05	1.82e-07	0	1.67e-06
Arthrobacter dokdonellae	1.07e-05	3.05e-05	1.29e-06	5.54e-07	0	2.16e-06	7.7e-07	0	0	0	1.07e-07	4.54e-05	1.88e-06	0	1.42e-06
Arthrobacter jiangjiafuii	7.54e-06	2.35e-05	0	4.43e-07	0	5.15e-07	1.26e-06	0	1.86e-06	3.84e-06	0	3.61e-05	6.05e-08	0	8.36e-07
Arthrobacter koreensis	1.15e-05	9.58e-06	6.13e-08	2.22e-07	0	3.5e-06	9.8e-07	3.14e-07	3.1e-07	0	3.21e-07	3.34e-05	3.63e-07	0	5.15e-07
Arthrobacter oryzae	1.39e-05	2e-05	1.23e-07	2.22e-07	0	1.75e-06	7.7e-07	0	0	0	4.28e-07	2.14e-05	3.63e-07	6.51e-08	9.01e-07
Arthrobacter polaris	9.92e-06	3.31e-05	1.23e-06	4.43e-07	0	2.68e-06	1.01e-06	0	0	0	1.07e-07	2e-05	1.45e-06	1.76e-06	9.65e-07
Arthrobacter sp. 24S4-2	4.36e-06	8.71e-06	3.06e-07	5.54e-07	0	1.23e-06	3.5e-07	0	0	0	2.14e-07	2.94e-05	8.05e-06	1.3e-07	1.35e-06
Arthrobacter sp. ATA002	4.76e-06	7.84e-06	0	6.65e-07	6.29e-08	8.23e-07	8.75e-07	1.73e-06	4.65e-07	4.38e-06	0	4.01e-05	3.03e-07	0	7.72e-07
Arthrobacter sp. CDRTa11	3.97e-07	1.13e-05	0	6.65e-07	0	1.34e-06	1.89e-06	0	0	0	3.21e-07	2e-05	7.87e-07	0	1.29e-06
Arthrobacter sp. CJ23	1.51e-05	3.48e-05	1.23e-07	4.43e-07	0	1.54e-06	4.2e-07	0	4.65e-07	1.46e-07	5.35e-07	4.54e-05	3.63e-07	1.95e-07	1.99e-06
Arthrobacter sp. DNA4	8.33e-06	2.79e-05	0	2.22e-07	0	1.03e-06	3.5e-08	0	7.75e-07	0	0	1.6e-05	6.05e-08	0	1.93e-06
Arthrobacter sp. EM1	4.76e-06	1.92e-05	0	3.32e-07	0	1.03e-06	8.05e-07	0	1.4e-06	3.41e-07	5.35e-07	3.61e-05	2.06e-06	0	1.09e-06
Arthrobacter sp. ERGS1:01	8.73e-06	1.74e-05	1.35e-06	4.43e-07	0	1.54e-06	3.85e-07	0	1.55e-07	2.92e-07	5.35e-07	5.34e-05	8.9e-06	0	1.74e-06
Arthrobacter sp. FB24	2.38e-06	1.39e-05	0	1.33e-06	0	2.26e-06	9.8e-07	1.57e-07	1.55e-07	4.86e-08	6.42e-07	3.47e-05	6.05e-07	0	8.36e-07
Arthrobacter sp. FW305-BF8	1.35e-05	2.35e-05	6.13e-08	7.76e-07	0	1.96e-06	4.55e-07	1.57e-07	3.1e-07	0	0	3.47e-05	1.21e-07	1.24e-06	6.43e-07
Arthrobacter sp. FW306-2-2C-D06B	1.19e-05	4.7e-05	6.13e-08	5.54e-06	0	4.43e-06	3.15e-07	0	0	0	1.07e-07	3.74e-05	9.69e-07	1.3e-07	5.79e-07
Arthrobacter sp. Helios	6.75e-06	3.48e-05	1.23e-07	7.76e-07	0	3.6e-06	2.1e-07	7.84e-07	0	4.86e-08	0	3.34e-05	4.24e-07	6.51e-08	1.09e-06
Arthrobacter sp. KBS0702	5.16e-06	7.84e-06	0	6.65e-07	2.64e-06	1.75e-06	2.1e-07	0	0	0	0	2.14e-05	1.21e-07	0	2.12e-06
Arthrobacter sp. MMS18-M83	1.75e-05	1.48e-05	2.76e-06	4.43e-07	5.6e-06	2.88e-06	1.71e-06	0	0	0	1.07e-07	4.41e-05	1.15e-06	0	1.16e-06
Arthrobacter sp. NEB 688	3.45e-05	0.000132331	1.23e-07	5.32e-06	0	1.13e-06	7e-08	0	0	0	3.21e-07	0.000102838	7.87e-07	1.04e-06	1.24e-05
Arthrobacter sp. NicSoilB4	2.78e-06	1.13e-05	1.23e-07	8.86e-07	0	5.15e-07	3.85e-07	0	0	0	0	4.14e-05	3.03e-07	6.51e-08	1.09e-06
Arthrobacter sp. NicSoilB8	9.13e-06	2.61e-05	6.13e-08	7.76e-07	0	1.23e-06	7.7e-07	0	3.1e-07	2.43e-07	1.07e-06	6.54e-05	1.21e-07	1.95e-07	1.42e-06
Arthrobacter sp. NtRootA1	5.16e-06	1.92e-05	0	0	0	2.16e-06	1.75e-07	0	3.1e-07	0	0	1.47e-05	0	3.51e-06	5.79e-07
Arthrobacter sp. PAMC 25486	1.39e-05	4.18e-05	4.23e-06	3.32e-07	0	1.54e-06	1.12e-06	0	0	0	0	3.61e-05	1.94e-06	3.9e-07	2.64e-06
Arthrobacter sp. PAMC25284	9.52e-06	4e-05	1.23e-07	2.22e-07	0	7.51e-06	4.9e-07	0	0	0	3.21e-07	2.67e-05	2.42e-07	0	5.15e-07
Arthrobacter sp. PAMC25564	4.76e-06	8.71e-06	6.13e-08	6.98e-06	0	3.5e-06	1.01e-06	0	0	0	0	2.4e-05	6.66e-07	0	1.42e-06
Arthrobacter sp. PGP41	1.23e-05	1.57e-05	6.13e-08	2.22e-07	0	3.29e-06	2.1e-07	0	0	0	0	2.94e-05	5.45e-07	0	5.28e-06
Arthrobacter sp. PM3	3.17e-06	1.48e-05	1.84e-07	3.32e-07	0	3.19e-06	6.3e-07	3.14e-07	0	0	4.28e-07	4.14e-05	8.48e-07	0	1.48e-06
Arthrobacter sp. QXT-31	3.57e-06	1.74e-05	2.45e-07	2.22e-07	0	1.96e-06	7e-07	0	0	0	0	3.74e-05	3.69e-06	6.51e-08	1.74e-06
Arthrobacter sp. StoSoilB20	4.76e-06	3.57e-05	1.23e-07	6.54e-06	0	7.31e-06	3.15e-07	1.57e-07	3.1e-07	1.17e-06	3.21e-07	2.27e-05	5.21e-06	0	7.72e-07
Arthrobacter sp. StoSoilB22	9.92e-06	5.83e-05	0	1.22e-06	0	6.59e-06	8.05e-07	0	3.1e-07	2.43e-07	1.39e-06	2.27e-05	4.24e-07	0	1.09e-06
Arthrobacter sp. StoSoilB5	1.51e-05	1.39e-05	1.23e-07	3.32e-07	0	3.5e-06	1.43e-06	0	0	0	0	2.14e-05	3.63e-07	1.95e-07	3.86e-07
Arthrobacter sp. U41	5.16e-06	2.44e-05	1.47e-06	8.86e-07	0	1.65e-06	8.05e-07	0	0	2.92e-07	0	2.8e-05	4.24e-07	0	1.42e-06
Arthrobacter sp. UKPF54-2	7.94e-07	8.71e-06	1.23e-07	1.11e-06	1.26e-07	5.15e-07	6.65e-07	6.27e-07	0	0	1.07e-07	4.14e-05	5.69e-06	1.56e-06	1.48e-06
Arthrobacter sp. Y-9	6.35e-06	1.04e-05	6.13e-08	3.32e-07	0	8.23e-07	3.15e-07	0	1.55e-07	0	1.07e-07	5.08e-05	1.03e-06	0	5.79e-07
Arthrobacter sp. YA7-1	1.19e-05	4e-05	6.13e-08	1.11e-07	0	2.16e-06	6.65e-07	1.57e-07	3.1e-07	9.73e-08	0	4.01e-05	1.21e-06	6.51e-08	1.61e-06
Arthrobacter sp. YC-RL1	3.97e-06	1.92e-05	6.13e-08	3.32e-07	0	9.26e-07	1.61e-05	0	0	0	0	2e-05	4.84e-07	0	1.48e-06
Arthrobacter sp. YN	2.78e-06	2.09e-05	6.13e-08	1.11e-07	0	4.53e-06	1.4e-07	0	0	0	8.56e-07	1.34e-05	4.84e-07	0	3.86e-07
Arthrobacter sp. zg-Y20	2.38e-06	2.96e-05	6.13e-08	2.22e-07	6.29e-08	1.85e-06	1.05e-06	1.57e-07	3.1e-07	4.86e-08	5.35e-07	2.67e-05	1.03e-06	0	6.43e-07
Arthrobacter sp. zg-Y815	6.35e-06	1.13e-05	4.72e-06	1.11e-07	0	1.65e-06	6.3e-07	0	0	0	0	3.07e-05	7.26e-07	1.95e-07	1.03e-06
Arthrobacter sp. zg-Y820	8.73e-06	8.71e-06	6.13e-08	2.22e-07	0	4.32e-06	4.55e-07	0	0	4.86e-08	6.42e-07	4.27e-05	3.33e-06	3.25e-07	1.29e-06
Arthrobacter sp. zg-Y859	7.54e-06	1.74e-05	0	3.32e-07	0	3.09e-07	6.65e-07	0	0	9.24e-07	0	1.47e-05	1.21e-07	1.3e-07	3.22e-07
Arthrobacter sp. zg-Y919	1.59e-06	3.48e-05	6.13e-08	7.53e-06	0	1.54e-06	2.1e-07	0	0	0	0	2.54e-05	0	0	1.09e-06
Arthrobacter sulfonylureivorans	1.63e-05	2.96e-05	3.06e-07	1.11e-07	0	4.12e-06	1.78e-06	7.84e-07	0	2.43e-07	5.35e-07	3.87e-05	4.12e-06	4.88e-06	1.35e-06
Arthrobacter sunyaminii	1.94e-05	3.74e-05	0	2.22e-07	6.29e-08	1.44e-06	9.8e-07	0	1.55e-07	9.73e-08	0	3.34e-05	3.63e-07	6.51e-08	6.43e-07
Arthrobacter woluwensis	4.76e-06	1.74e-05	0	9.97e-07	0	7e-06	4.55e-07	3.76e-06	0	0	0	2.94e-05	3.03e-07	3.25e-07	1.16e-06
Arthrobacter zhangbolii	3.57e-06	8.71e-06	0	1.11e-07	0	2.98e-06	1.75e-07	3.14e-07	1.55e-07	4.86e-08	1.07e-07	2.67e-05	7.87e-07	7.81e-07	3.86e-07
Arthrospira platensis	3.97e-07	0.000108825	0	3.32e-07	0	2.06e-07	0	0	0	0	0	1.2e-05	3.63e-07	1.3e-07	2.06e-06
Asaia bogorensis	1.19e-06	3.48e-06	1.84e-07	7.76e-07	0	4.12e-07	0	1.57e-07	7.75e-07	3.89e-07	7.49e-07	7.08e-05	5.45e-07	6.51e-08	8.36e-07
Asticcacaulis excentricus	4.05e-05	0.000309062	7.17e-06	3.99e-06	0	9.26e-07	6.65e-07	6.27e-07	0	6.81e-07	2.14e-07	0.000327212	3.21e-06	3.25e-07	2.83e-06
Asticcacaulis sp. AND118	1.51e-05	4e-05	4.78e-06	1.11e-06	0	9.26e-07	2.73e-06	2.82e-06	1.55e-07	6.32e-07	1.5e-06	0.000244408	1.7e-06	0	2.83e-06
Asticcacaulis sp. SL142	9.13e-06	6.18e-05	0	5.54e-07	0	4.12e-07	1.05e-07	3.45e-06	6.2e-07	0	2.14e-07	0.000142905	1.57e-06	3.25e-07	1.35e-06
Asticcacaulis sp. ZE23SCel15	5.55e-06	4.27e-05	0	5.54e-07	0	1.13e-06	8.4e-07	1.55e-05	1.55e-07	4.86e-08	7.06e-06	0.000106845	8.48e-07	1.3e-07	7.72e-07
Athalassotoga saccharophila	2.18e-05	2.44e-05	0	7.76e-07	0	0	0	0	0	0	0	1.47e-05	4.24e-07	6.51e-08	1.93e-07
Atlantibacter hermannii	6.35e-05	1.83e-05	6.74e-07	0.000116658	1.51e-06	0.000105892	6.61e-06	4.89e-05	5.3e-05	6.1e-05	0.000197893	5.88e-05	6.19e-05	0.000261888	1.76e-05
Atlantibacter subterranea	4.36e-06	1.74e-06	0	1.81e-05	0	1.46e-05	2.38e-05	4.55e-06	8.99e-06	1.24e-05	3.87e-05	2e-05	6.84e-06	3.38e-05	0
Aurantiacibacter atlanticus	7.54e-06	1.92e-05	0	1.11e-07	0	1.44e-06	0	0	0	0	0	6.94e-05	3.63e-07	0	1.61e-06
Aurantiacibacter gangjinensis	2.42e-05	1.31e-05	0	3.32e-07	0	2.06e-07	7e-08	2.67e-06	0	0	2.14e-07	6.94e-05	2.42e-07	0	1.48e-06
Aurantiacibacter sp. MUD11	3.37e-05	4.88e-05	0	3.99e-06	0	1.13e-06	3.5e-08	3.14e-07	0	0	0	8.15e-05	4e-06	6.51e-08	9.39e-06
Aurantiacibacter sp. MUD61	1.98e-05	6.88e-05	0	1.66e-06	0	1.03e-06	3.5e-08	0	1.55e-07	7.3e-07	1.61e-06	8.41e-05	7.87e-07	2.6e-07	2.25e-06
Aurantimicrobium minutum	8.85e-05	0.000932409	6.13e-08	4.76e-06	0	9.96e-05	7e-08	0	0	0	0	1.07e-05	0	0	5.79e-07
Aurantimicrobium photophilum	0.00153593	0.0147488	0	7.64e-05	0	0.0017872	1.4e-07	0	0	0	1.07e-07	6.14e-05	1.27e-06	1.95e-07	1.02e-05
Aurantimicrobium sp. INA4	0.000106733	0.00103166	0	5.32e-06	0	0.000103011	1.05e-07	0	0	0	0	9.35e-06	6.05e-07	0	2.57e-07
Aurantimicrobium sp. MWH-Uga1	0.000144031	0.0010926	0	4.99e-06	0	0.000107024	3.5e-08	0	0	0	0	1.47e-05	6.66e-07	0	4.5e-07
Aurantimonas sp. HBX-1	1.55e-05	0.000169766	6.13e-08	1.77e-06	0	1.85e-06	3.5e-07	7.53e-06	3.1e-07	2.92e-07	1.07e-07	0.00030985	8.23e-06	0	3.67e-06
Auraticoccus monumenti	9.13e-06	2.79e-05	1.23e-07	1.11e-06	0	3.09e-07	3.85e-07	3.14e-07	1.55e-07	1.46e-07	1.28e-06	0.000102838	1.88e-06	2.99e-06	3.02e-06
Aureibaculum algae	6.94e-05	0.000437039	1.65e-06	1.11e-07	0	2.98e-06	0	6.27e-07	3.88e-06	0	7.49e-07	2.8e-05	6.66e-07	1.33e-05	5.85e-06
Aureimonas altamirensis	1.23e-05	7.49e-05	6.31e-06	5.65e-06	0	3.09e-07	1.75e-07	2.04e-06	3.1e-07	9.73e-08	0	0.000138898	1.15e-06	2.6e-07	1.61e-06
Aureimonas mangrovi	1.27e-05	0.000228096	9.01e-06	1.33e-06	0	1.03e-06	2.94e-06	1.88e-06	0	4.86e-07	0	0.000188314	9.69e-07	1.3e-07	2.32e-06
Aureimonas populi	1.43e-05	0.000199367	4.9e-07	6.65e-07	0	6.17e-07	3.15e-07	6.27e-06	3.1e-07	0	1.57e-05	0.000185643	5.51e-06	0	1.93e-06
Aureimonas sp. AU20	1.75e-05	0.000505816	0	2.44e-06	8.81e-07	2.47e-06	2.45e-07	3.45e-06	3.1e-07	2.92e-07	1.28e-06	0.000233723	4.96e-06	4.55e-07	1.65e-05
Aureimonas sp. OT7	1.19e-05	5.57e-05	4.66e-06	9.97e-07	0	2.06e-07	1.5e-06	9.41e-07	0	1.46e-07	1.39e-06	0.000116194	1.09e-06	6.51e-08	1.42e-06
Aureimonas sp. SA4125	2.82e-05	0.000230708	0	2.77e-06	0	1.54e-06	3.5e-07	1.49e-05	0	0	3.21e-07	0.000283139	2.6e-06	0	4.25e-06
Aureispira sp. CCB-E	3.17e-05	6.96e-05	1.23e-07	6.65e-07	0	4.12e-07	0	0	3.1e-07	1.95e-07	0	2.94e-05	6.66e-07	1.04e-06	3.22e-07
Aureispira sp. EL160426	5e-05	2.96e-05	3.61e-06	2.22e-07	0	4.12e-07	3.5e-08	3.14e-07	3.57e-06	0	4.28e-07	7.61e-05	4.84e-07	1.5e-06	1.93e-07
Aureliella helgolandensis	7.94e-06	6.96e-06	0	3.32e-07	0	1.03e-07	3.5e-08	0	0	0	0	9.88e-05	5.45e-07	0	6.43e-07
Austwickia chelonae	5.16e-06	2.52e-05	0	1.11e-07	0	6.17e-06	3.85e-07	7.84e-07	0	4.86e-08	6.42e-07	3.74e-05	4.84e-07	3.9e-07	7.72e-07
Avibacterium paragallinarum	3.17e-06	8.71e-06	0	7.76e-07	0	1.85e-06	3.85e-07	4.39e-06	2.28e-05	1.95e-07	7.49e-07	5.21e-05	3.03e-07	6.9e-06	1.29e-06
Avibacterium sp. 20-132	3.97e-07	0	6.23e-05	4.43e-07	0	1.65e-06	0	6.27e-07	4.34e-06	0	0	2.67e-06	1.21e-07	1.3e-07	0
Avibacterium sp. 21-595	3.97e-07	4.35e-06	0	5.54e-07	0	1.03e-07	0	6.27e-07	1.19e-05	0	0	0	6.05e-08	4.88e-06	0
Avibacterium volantium	1.59e-06	5.22e-06	6.13e-08	5.1e-06	5.04e-07	1.96e-06	2.1e-07	6.12e-06	4.03e-06	0	0	1.34e-05	4.24e-07	1.56e-06	1.29e-07
Azoarcus olearius	2.54e-05	9.4e-05	1.84e-07	2.88e-06	0	5.45e-06	4.9e-07	1.57e-06	1.55e-07	1.95e-07	7.49e-07	0.000336561	2.23e-05	2.6e-07	2.32e-05
Azoarcus sp. CIB	2.46e-05	7.05e-05	0	1.55e-06	6.29e-08	4.01e-06	1.05e-07	1.57e-07	7.75e-07	1.46e-07	1.61e-06	0.000324541	2.66e-06	6.51e-08	1.31e-05
Azoarcus sp. DD4	2.02e-05	5.75e-05	6.13e-08	4.1e-06	1.26e-07	7.2e-06	8.75e-07	4.71e-07	6.2e-07	2.04e-06	3.32e-06	0.000347246	1.12e-05	1.11e-06	2.05e-05
Azoarcus sp. DN11	1.51e-05	0.000194143	2.45e-07	1.55e-06	6.92e-07	2.98e-06	1.89e-06	0	1.55e-07	9.73e-08	1.61e-06	0.000352588	9.87e-06	0	2.12e-05
Azoarcus sp. KH32C	2.14e-05	0.000255085	6.13e-08	1.55e-06	6.29e-08	4.84e-06	3.85e-07	0	1.55e-07	1.46e-07	1.71e-06	0.000371286	1.39e-05	5.21e-07	1.66e-05
Azorhizobium caulinodans	2.9e-05	0.000523228	0	1.88e-06	1.26e-07	6.17e-07	1.4e-07	1.57e-07	6.2e-07	9.73e-08	0	0.000426044	1.07e-05	1.56e-06	3.41e-06
Azospira inquinata	1.59e-05	5.57e-05	0	1.55e-06	1.26e-07	2.57e-06	0	3.14e-07	1.55e-07	1.26e-06	6.42e-07	0.000205676	4.78e-06	4.23e-06	5.85e-06
Azospira oryzae	9.13e-06	8.71e-06	0	7.76e-07	6.29e-08	1.34e-06	3.5e-08	0	0	4.86e-08	1.07e-07	7.35e-05	2.18e-06	3.9e-07	5.21e-06
Azospira restricta	4.29e-05	6.44e-05	0	3.21e-06	0	6.79e-06	1.75e-07	1.57e-06	4.65e-07	2.43e-07	3.96e-06	0.000743908	1.32e-05	1.95e-07	3.01e-05
Azospira sp. I09	7.94e-06	1.65e-05	6.13e-08	4.43e-07	0	1.44e-06	1.4e-07	0	0	4.86e-07	1.07e-06	8.81e-05	8.96e-06	1.3e-07	5.21e-06
Azospirillum argentinense	1.43e-05	0.000177602	1.23e-07	1.33e-06	0	2.57e-06	2.1e-07	1.57e-07	0	2.92e-07	4.07e-06	0.00026177	5.87e-06	4.55e-07	4.18e-06
Azospirillum baldaniorum	2.78e-06	1.74e-05	0	4.43e-07	6.29e-08	8.23e-07	0	0	6.2e-07	0	0	9.48e-05	3.63e-07	1.95e-07	1.16e-06
Azospirillum brasilense	3.41e-05	0.000136684	1.16e-06	2.66e-06	0	2.78e-06	3.15e-07	6.27e-07	3.1e-07	2.92e-07	6.42e-06	0.000444742	1.27e-05	8.46e-07	6.24e-06
Azospirillum humicireducens	2.54e-05	0.000104472	7.35e-07	4.43e-07	0	1.65e-06	7.35e-07	4.71e-07	0	9.24e-07	2.14e-07	0.00022571	4.66e-06	1.95e-07	1.8e-06
Azospirillum lipoferum	7.54e-06	1.31e-05	6.13e-08	1.33e-06	0	4.12e-07	4.2e-07	9.41e-07	1.55e-07	0	2.14e-07	0.000174958	3.51e-06	0	1.09e-06
Azospirillum oryzae	8.73e-06	1.39e-05	1.65e-06	2.1e-06	0	9.26e-07	1.33e-06	0	3.1e-07	0	4.28e-07	0.000136227	9.69e-07	3.9e-07	1.16e-06
Azospirillum ramasamyi	1.71e-05	2.09e-05	6.13e-08	9.97e-07	0	1.03e-06	1.75e-07	3.14e-07	7.75e-07	6.32e-07	2.14e-07	0.000176294	8.96e-06	0	1.74e-06
Azospirillum sp. B510	2.38e-05	0.000190661	8.58e-07	3.43e-06	9.69e-06	2.78e-06	4.55e-07	0	1.09e-06	2.43e-07	1.39e-06	0.000280468	1.27e-05	2.54e-06	2.19e-06
Azospirillum sp. TSA2s	2.06e-05	0.000140166	1.84e-07	9.97e-07	0	8.23e-07	0	0	3.1e-07	9.73e-08	7.49e-07	0.000174958	7.02e-06	1.3e-07	1.16e-06
Azospirillum sp. TSH100	2.5e-05	0.000132331	2.45e-07	1.88e-06	0	7.2e-07	3.15e-07	1.41e-06	6.2e-07	4.86e-07	0	0.00018965	8.6e-06	1.3e-07	2.9e-06
Azospirillum sp. TSH58	7.94e-06	1.39e-05	0	6.65e-07	0	1.13e-06	1.05e-07	0	1.55e-07	2.92e-07	5.35e-07	0.00010818	3.51e-06	0	9.01e-07
Azospirillum thermophilum	3.33e-05	9.49e-05	0	3.1e-06	6.29e-08	2.06e-06	2.45e-07	3.76e-06	1.55e-07	0	1.39e-06	0.000422037	1.15e-05	5.86e-07	1.24e-05
Azospirillum thiophilum	2.9e-05	5.48e-05	6.13e-08	1.99e-06	0	2.88e-06	2.45e-07	4.71e-07	1.55e-07	4.86e-08	1.18e-06	0.000253757	1.63e-06	0	5.28e-06
Azotobacter chroococcum	1.43e-05	4.44e-05	1.89e-05	1.68e-05	0	1.53e-05	3.53e-06	2.51e-06	2.64e-06	5.3e-06	7.92e-06	0.000134892	3.75e-06	1.98e-05	9.14e-06
Azotobacter salinestris	1.23e-05	1.65e-05	9.56e-06	6.76e-06	1.26e-07	6.07e-06	4.27e-06	5.8e-06	1.4e-06	3.7e-06	7.71e-06	9.88e-05	4.84e-07	6.31e-06	1.72e-05
Azotobacter vinelandii	1.86e-05	2.52e-05	3.92e-06	1.87e-05	2.52e-07	1.55e-05	1.03e-05	3.14e-06	2.95e-06	3.79e-06	9.74e-06	0.000105509	5.69e-06	6.57e-06	2.77e-05
Bacillus altitudinis	4.09e-05	2.35e-05	6.13e-08	0	1.26e-07	1.65e-06	0	0	0	2.19e-06	0	2.54e-05	1.21e-07	0	1.29e-07
Bacillus anthracis	3.97e-07	0	6.13e-08	0	0	1.03e-07	7e-08	0	0	9.73e-08	1.36e-05	1.2e-05	0	6.51e-08	2.57e-07
Bacillus atrophaeus	4.36e-06	3.48e-06	2.45e-07	0	0	1.13e-06	0	1.1e-06	6.2e-07	0	3.21e-07	1.2e-05	8.48e-07	0	3.8e-06
Bacillus badius	1.59e-06	7.84e-06	1.45e-05	1.11e-07	0	2.06e-07	0	0	0	0	7.49e-07	2.4e-05	6.05e-08	0	3.22e-07
Bacillus cereus	1.35e-05	0.00516176	8.21e-06	9.97e-07	0	1.75e-06	3.15e-07	6.27e-07	6.2e-07	2.43e-07	0.000538346	0.000106845	2.48e-06	0	7.08e-07
Bacillus cytotoxicus	3.57e-06	4.35e-06	5.75e-05	0	0	2.06e-07	3.5e-08	0	0	0	7.71e-06	1.47e-05	3.63e-07	1.95e-07	2.57e-07
Bacillus dafuensis	7.94e-07	3.48e-06	2.29e-05	6.65e-07	0	7.2e-07	3.5e-08	0	1.09e-06	0	0	6.68e-06	3.63e-07	0	6.43e-08
Bacillus halotolerans	7.94e-07	8.71e-07	0	0	0	0	2.8e-07	0	0	4.86e-08	7.49e-07	1.07e-05	4.42e-06	6.51e-08	1.29e-07
Bacillus mycoides	1.63e-05	4.7e-05	4.72e-06	1.55e-06	0	8.23e-07	1.05e-07	1.57e-07	9.3e-07	4.86e-07	0.000242309	5.34e-05	1.63e-06	1.11e-06	1.35e-06
Bacillus paralicheniformis	2.38e-06	1.13e-05	0	0	0	3.7e-06	2.8e-07	0	0	4.86e-08	0	2.54e-05	6.66e-07	0	4.12e-06
Bacillus paranthracis	0	2.52e-05	0	1.11e-07	6.29e-08	0	0	1.57e-07	3.1e-07	1.46e-07	1.5e-06	5.34e-06	0	0	5.92e-06
Bacillus pumilus	0.00183629	4.27e-05	4.97e-05	1.33e-06	0	9.26e-07	3.5e-08	1.73e-06	3.1e-07	1.24e-05	5.35e-07	0.000148247	4.84e-07	8.46e-07	7.08e-07
Bacillus safensis	1.67e-05	9.58e-06	6.13e-08	0	0	4.12e-07	0	0	1.55e-07	2.33e-06	0	3.07e-05	2.42e-07	9.76e-07	6.43e-08
Bacillus sp. 1NLA3E	2.82e-05	2.44e-05	0	0	1.07e-06	0	0	0	0	4.86e-08	0	1.2e-05	2.42e-07	6.51e-08	1.29e-07
Bacillus sp. FJAT-18017	3.97e-07	5.22e-06	5.88e-06	0	0	0	6.3e-07	0	0	0	1.07e-07	3.34e-05	0	0	0
Bacillus sp. JAS24-2	0	6.96e-06	0	1.11e-07	0	0	0	0	0	0	1.24e-05	0	0	0	0
Bacillus sp. NEB1478	2.38e-06	1.74e-05	6.13e-08	0	0	6.17e-07	0	3.14e-07	7.44e-06	0	0	1.47e-05	5.45e-07	0	1.29e-07
Bacillus sp. THAF10	7.94e-07	2.61e-06	7.23e-06	0	0	9.26e-07	0	1.57e-07	0	4.86e-08	1.07e-07	1.6e-05	1.82e-07	0	6.43e-08
Bacillus sp. Y1	1.19e-06	2.61e-06	4.78e-06	0	2.58e-06	1.03e-07	0	0	1.24e-06	0	2.14e-07	1.47e-05	1.21e-07	6.51e-07	6.43e-08
Bacillus subtilis	4.76e-06	6.09e-06	2.45e-07	3.32e-07	0	1.54e-06	2.45e-07	5.18e-06	0	6.81e-07	2.14e-07	3.47e-05	2.42e-07	3.9e-07	3.22e-07
Bacillus thuringiensis	9.52e-06	0.0163733	5.87e-05	1.11e-07	0	8.23e-07	5.95e-07	1.88e-06	3.1e-07	3.41e-07	0.000182695	3.21e-05	4.24e-07	0	8.36e-07
Bacillus tropicus	0	2.61e-06	0	0	0	0	0	0	0	0	1.51e-05	8.01e-06	2.42e-07	0	0
Bacillus velezensis	3.69e-05	4.88e-05	0	1.44e-06	0	9.26e-07	1.05e-07	0	9.3e-07	1.12e-06	4.28e-07	8.15e-05	4.06e-06	8.46e-07	1.09e-06
Bacillus wiedmannii	1.31e-05	8.71e-06	0	1.11e-07	0	5.15e-07	0	9.73e-06	1.55e-07	0	0.000101034	3.87e-05	2.42e-07	0	5.15e-07
Bacterioplanes sanyensis	6.75e-06	1.31e-05	1.84e-07	2.66e-06	6.29e-08	3.19e-06	3.5e-07	3.14e-07	1.71e-06	1.12e-06	1.07e-07	4.14e-05	3.63e-07	1.5e-06	9.01e-06
Bacterioplanoides sp. SCSIO 12839	3.57e-06	1.31e-05	1.97e-05	5.54e-07	0	1.34e-06	3.15e-07	0	4.65e-07	9.73e-08	9.63e-07	4.27e-05	1.21e-07	5.47e-06	2.64e-06
Bacteriovorax stolpii	2.1e-05	2.26e-05	0	1.22e-06	0	6.17e-07	3.5e-08	0	4.65e-07	4.86e-08	0	0.000148247	5.45e-07	3.25e-07	9.59e-06
Bacteroides caccae	2.38e-06	1.48e-05	0	3.32e-07	0	2.06e-07	0	0	3.1e-07	0	0	4.14e-05	0	0	6.95e-06
Bacteroides cellulosilyticus	3.17e-06	1.74e-05	0	3.32e-07	0	1.03e-06	0	0	3.1e-07	9.73e-08	0	2.94e-05	3.63e-07	5.34e-06	1.19e-05
Bacteroides coprosuis	3.97e-06	1.39e-05	0	0	0	5.15e-07	3.5e-08	9.41e-07	1.71e-05	0	0	2.94e-05	1.82e-07	0	8.36e-07
Bacteroides eggerthii	1.98e-06	1.92e-05	0	3.32e-07	0	0	0	0	0	0	3.21e-07	2.8e-05	1.82e-07	0	6.63e-06
Bacteroides faecis	7.94e-07	6.09e-06	0	6.65e-07	0	0	0	0	1.55e-07	0	2.14e-07	4.27e-05	1.21e-07	0	4.83e-06
Bacteroides fragilis	1.03e-05	2.09e-05	0	1.55e-06	0	7.2e-07	1.75e-07	1.25e-06	4.65e-07	0	0	9.22e-05	3.03e-07	4.62e-06	8.43e-06
Bacteroides helcogenes	2.78e-06	1.65e-05	0	1.11e-07	0	0	7.35e-07	4.71e-07	3.1e-07	9.73e-08	1.07e-07	2.4e-05	6.05e-08	0	5.79e-06
Bacteroides heparinolyticus	2.38e-06	1.31e-05	0	3.32e-07	0	2.47e-06	0	1.57e-07	6.2e-07	4.86e-08	4.28e-07	2.27e-05	1.39e-06	0	6.43e-07
Bacteroides intestinalis	1.23e-05	1.31e-05	0	0	0	4.12e-07	3.5e-08	0	3.1e-07	9.73e-08	3.21e-07	2.27e-05	1.82e-07	0	1.54e-06
Bacteroides nordii	2.38e-06	2.35e-05	9.8e-07	5.54e-07	0	4.12e-07	0	0	4.65e-07	0	0	2.27e-05	3.63e-07	1.56e-06	1.61e-06
Bacteroides salyersiae	4.76e-06	1.92e-05	6.13e-08	2.22e-07	0	7.2e-07	0	0	1.55e-07	4.86e-08	0	4.67e-05	4.9e-06	0	2.44e-06
Bacteroides stercoris	7.14e-06	1.65e-05	3.12e-06	9.97e-07	0	9.26e-07	0	6.27e-07	1.55e-07	0	0	3.74e-05	6.05e-08	0	8.75e-06
Bacteroides thetaiotaomicron	1.75e-05	8.01e-05	0	5.54e-07	0	1.13e-06	1.05e-07	1.57e-07	0	0	6.21e-06	7.48e-05	5.45e-07	3.32e-06	1.61e-05
Bacteroides uniformis	7.94e-07	1.74e-06	0	1.11e-07	0	3.09e-07	0	0	6.2e-07	0	3.21e-07	4.81e-05	6.05e-08	0	2.92e-05
Bacteroides xylanisolvens	2.1e-05	6.96e-06	0	3.32e-07	0	4.12e-07	7e-08	0	0	0	1.28e-06	4.67e-05	0	5.21e-07	6.76e-06
Baekduia alba	2.66e-05	7.84e-05	2.21e-06	2.33e-06	0	3.09e-07	3.5e-07	0	1.55e-07	9.73e-08	2.14e-07	0.000372622	3.09e-06	3.25e-07	5.4e-06
Baekduia soli	5.24e-05	9.32e-05	1.23e-07	2.22e-06	0	2.06e-07	0	0	0	4.86e-08	1.07e-07	0.00033389	5.02e-06	3.25e-07	4.95e-06
Barrientosiimonas endolithica	8.33e-06	2.96e-05	0	6.65e-07	6.29e-08	9.26e-07	3.5e-08	0	0	4.86e-08	1.07e-07	0.000102838	2.42e-07	9.76e-07	2.7e-06
Bartonella apihabitans	7.54e-06	0.000125366	0	1.11e-07	0	5.15e-07	1.85e-06	4.17e-05	2.17e-06	4.86e-08	7.49e-07	6.01e-05	8.48e-07	6.9e-06	1.93e-07
Bartonella bacilliformis	0	2.18e-05	2.51e-05	0	0	0	1.75e-07	8.47e-06	0	0	0	2.27e-05	1.82e-07	0	6.43e-08
Bartonella choladocola	3.17e-06	6.62e-05	0	0	0	3.09e-07	2.8e-07	1.08e-05	3.1e-07	0	0	2.94e-05	3.03e-07	7.16e-07	1.93e-07
Bartonella grahamii	0	0	0	0	7.11e-06	0	3.5e-08	3.14e-06	1.4e-06	0	0	9.35e-06	6.05e-08	0	0
Bartonella henselae	1.98e-06	1.31e-05	0	0	0	1.75e-06	0	0	4.03e-06	8.27e-07	1.07e-07	2.94e-05	2.42e-07	0	6.43e-08
Bartonella krasnovii	3.97e-07	2.44e-05	0	0	6.29e-07	0	9.45e-07	3.29e-06	0	9.73e-08	0	2.4e-05	1.82e-07	0	0
Bartonella machadoae	7.94e-07	9.32e-05	0	0	6.29e-07	0	3.5e-08	0	4.65e-07	0	0	6.68e-06	0	0	0
Bartonella sp. HY406	3.97e-07	1.74e-06	0	0	0	2.06e-07	6.3e-07	9.73e-06	1.55e-07	0	0	1.07e-05	6.17e-06	0	0
Bartonella sp. HY761	1.19e-06	0	5.43e-05	1.11e-07	0	2.06e-07	0	1.41e-06	0	4.86e-08	0	5.34e-06	6.05e-08	0	1.29e-07
Bartonella sp. TP	2.38e-06	0.000115789	5.57e-06	0	0	6.17e-07	3.5e-08	0	0	0	0	1.47e-05	1.21e-07	6.51e-08	0
Basilea psittacipulmonis	2.38e-06	1.74e-05	5.2e-05	1.11e-07	1.13e-06	1.44e-06	0	0	9.3e-07	0	2.14e-07	2.8e-05	1.82e-07	7.81e-07	3.86e-07
Bathymodiolus septemdierum thioautotrophic gill symbiont	1.59e-06	2.61e-06	0	5.54e-07	7.55e-07	1.44e-06	4.55e-07	0	3.1e-07	0	0	5.74e-05	4.84e-07	1.3e-07	1.29e-07
Bathymodiolus thermophilus thioautotrophic gill symbiont	1.19e-06	4.35e-06	1.84e-07	0	0	1.34e-06	1.4e-07	3.14e-07	1.55e-07	1.02e-06	6.42e-07	3.34e-05	0	7.68e-06	1.93e-07
Bdellovibrio bacteriovorus	9.52e-06	4.35e-05	1.72e-06	5.54e-07	9.44e-07	1.03e-06	1.26e-06	9.1e-06	4.5e-06	3.16e-06	1.07e-06	0.000136227	9.08e-07	4.55e-07	2.64e-06
Bdellovibrio sp. 22V	2.38e-06	8.71e-06	0	0	0	4.12e-07	1.75e-07	0	0	0	1.07e-07	7.61e-05	2.42e-07	0	1.03e-06
Bdellovibrio sp. SKB1291214	1.79e-05	1.48e-05	0	2.22e-07	0	4.12e-07	0	0	0	1.95e-07	2.03e-06	3.61e-05	5.39e-06	0	1.93e-07
Bdellovibrio sp. ZAP7	7.94e-07	6.09e-06	0	1.11e-07	0	1.03e-07	7e-08	1.25e-06	0	0	0	1.87e-05	6.05e-08	0	1.07e-05
Beggiatoa leptomitoformis	8.33e-06	5.22e-05	4.41e-06	4.43e-07	0	9.26e-07	5.95e-07	1.57e-06	8.06e-06	2.92e-07	0	8.01e-05	6.66e-07	1.69e-06	1.43e-05
Beijerinckia indica	2.18e-05	0.000438781	0	4.43e-07	0	6.17e-07	2.45e-07	1.1e-06	2.33e-06	0	4.28e-07	0.000196327	1.15e-06	1.95e-07	1.16e-06
Belliella baltica	3.13e-05	0.000158449	0	2.22e-07	0	1.23e-06	0	0	1.55e-07	0	0	2.94e-05	6.66e-07	5.21e-07	2.32e-06
Bermanella marisrubri	3.97e-06	5.22e-06	4.06e-05	5.54e-07	5.04e-07	1.54e-06	1.75e-07	1.1e-06	2.48e-06	7.3e-07	1.18e-06	2.4e-05	0	2.6e-07	5.79e-07
Bernardetia litoralis	5.87e-05	6.18e-05	0	4.43e-07	0	7.2e-07	0	3.14e-07	5.43e-06	0	0	3.87e-05	8.48e-07	1.3e-07	1.61e-06
Beutenbergia cavernae	6.35e-06	2.96e-05	3.06e-07	5.54e-07	0	3.09e-07	3.5e-08	0	4.03e-06	4.86e-08	1.07e-07	9.35e-05	1.39e-06	6.51e-08	1.54e-06
Bibersteinia trehalosi	2.38e-06	3.48e-06	4.72e-06	1.55e-06	1.07e-06	1.23e-06	3.5e-08	3.14e-06	2.33e-05	2.43e-07	3.21e-07	1.74e-05	9.08e-07	5.66e-06	4.5e-07
Bifidobacterium adolescentis	3.97e-07	1.74e-06	0	8.86e-07	0	5.15e-07	0	0	0	0	4.28e-07	2.14e-05	2.42e-07	0	3.21e-05
Bifidobacterium asteroides	3.09e-05	7.84e-06	1.23e-07	3.32e-07	0	1.23e-06	3.85e-07	1.57e-07	3.1e-07	9.73e-08	2.14e-07	5.61e-05	3.03e-07	6.51e-08	9.65e-07
Bifidobacterium bifidum	1.19e-06	1.48e-05	0	0	0	2.06e-07	0	0	3.1e-07	0	0	9.35e-06	6.05e-08	2.16e-05	1.22e-06
Bifidobacterium breve	1.47e-05	7.84e-06	0	3.32e-07	0	9.26e-07	1.05e-07	0	3.1e-07	0	0	3.34e-05	1.82e-07	3.77e-06	1.29e-06
Bifidobacterium catenulatum	1.19e-05	1.65e-05	0	0	0	5.15e-07	0	0	0	0	0	2.54e-05	1.21e-07	0	3.99e-06
Bifidobacterium longum	9.52e-06	2.18e-05	4.29e-06	2.44e-06	0	1.23e-06	5.25e-07	1.57e-07	0	4.86e-08	0	6.54e-05	7.26e-07	0	2.74e-05
Bifidobacterium pseudocatenulatum	3.17e-06	4.35e-06	0	5.21e-06	0	1.34e-06	3.5e-08	4.71e-07	0	0	0	1.6e-05	0	1.3e-07	2.52e-05
Bifidobacterium pseudolongum	5.16e-06	1.92e-05	0	2.88e-06	0	1.03e-06	1.4e-07	4.71e-07	3.1e-07	0	0	8.28e-05	6.05e-07	6.51e-08	1.07e-05
Bifidobacterium pullorum	2.78e-06	5.22e-06	0	3.32e-07	0	3.09e-07	2.1e-07	0	0	0	0	3.21e-05	5.45e-07	6.51e-08	3.99e-06
Bifidobacterium sp. ESL0690	5.55e-06	8.97e-05	0	2.22e-07	0	7.82e-06	3.5e-08	0	0	0	2.14e-07	1.74e-05	6.05e-08	0	0
Bifidobacterium thermophilum	7.94e-07	6.96e-06	0	0	0	3.5e-06	7e-08	1.57e-07	0	0	2.14e-07	4.14e-05	1.15e-06	2.6e-07	4.5e-07
Bisgaardia hudsonensis	2.78e-06	6.96e-06	1.13e-05	2.22e-07	0	1.44e-06	0	1.57e-06	2.87e-05	0	1.07e-07	9.35e-06	3.57e-06	0	1.93e-07
Bizionia sp. M204	0.000111098	0.000127107	6.13e-08	1.11e-07	0	2.57e-06	3.5e-08	1.57e-07	1.71e-06	0	3.21e-07	3.34e-05	1.27e-06	5.14e-06	1.8e-06
Blastochloris tepida	2.9e-05	0.000775701	1.23e-07	5.54e-07	0	9.26e-07	1.05e-07	6.27e-07	0	3.89e-07	1.07e-07	0.000520869	3.15e-06	3.9e-07	3.28e-06
Blastochloris viridis	2.82e-05	0.000415274	3.19e-06	1.33e-06	0	1.13e-06	1.19e-06	4.71e-07	0	1.46e-07	0	0.000474124	4.78e-06	1.3e-07	2.06e-06
Blastococcus saxobsidens	6.75e-06	2.96e-05	0	1.22e-06	0	3.09e-07	7e-08	1.57e-07	0	0	0	0.000106845	3.75e-06	1.95e-07	1.63e-05
Blastococcus sp. PRF04-17	1.55e-05	2.35e-05	0	2.1e-06	0	1.03e-06	1.4e-07	3.14e-07	0	2.92e-07	9.63e-07	0.000116194	6.66e-07	6.51e-08	1.36e-05
Blastomonas fulva	4.36e-06	1.57e-05	0	0	0	1.03e-07	0	0	0	3.89e-07	1.07e-07	3.34e-05	3.03e-07	0	2.51e-06
Blastomonas sp.	1.03e-05	6.09e-06	0	1.11e-07	7.55e-07	3.09e-07	0	0	1.55e-07	2.43e-07	1.18e-06	1.74e-05	4.24e-07	0	2.38e-06
Blastopirellula sp. J2-11	1.19e-06	6.96e-06	0	0	0	9.26e-07	7e-08	0	0	0	3.21e-07	0.000176294	1.21e-06	6.51e-08	8.36e-07
Blattabacterium cuenoti	0.000169028	0.000247249	3.68e-07	6.65e-07	6.29e-08	2.26e-06	2.17e-06	1.57e-07	5.12e-06	0	5.35e-07	0.000255092	3.75e-06	1.02e-05	2.12e-06
Blautia argi	0	2.61e-06	6.13e-08	4.43e-07	0	3.09e-07	3.5e-08	0	1.71e-06	0	0	3.87e-05	0	0	6.56e-06
Blautia hansenii	2.1e-05	4.35e-06	0	4.65e-06	0	4.12e-07	0	0	4.65e-07	9.73e-08	0	2.94e-05	6.05e-08	7.55e-06	4.73e-05
Blautia obeum	1.98e-06	0	0	6.65e-07	0	2.06e-07	2.45e-07	6.12e-06	0	0	0	5.34e-05	7.87e-07	0	1.31e-05
Blautia sp. NBRC 113351	1.98e-06	4.35e-06	1.23e-07	9.97e-07	0	1.03e-07	3.5e-08	3.14e-07	0	1.95e-07	6.42e-07	2.94e-05	1.21e-07	6.51e-08	3.09e-06
Blautia wexlerae	1.98e-06	4.35e-06	0	6.76e-06	0	0	0	0	0	0	1.07e-07	2.14e-05	6.05e-08	0	3.51e-05
Blochmannia endosymbiont of Camponotus (Colobopsis) obliquus	7.94e-07	3.48e-06	0	0	0	2.06e-07	0	1.25e-06	1.77e-05	9.73e-08	0	1.87e-05	2.42e-07	4.55e-07	1.29e-07
Blochmannia endosymbiont of Camponotus nipponensis	3.97e-07	2.96e-05	3.77e-05	2.22e-07	6.29e-08	0	0	7.84e-07	1.01e-05	0	0	8.01e-06	6.05e-08	0	0
Blochmannia endosymbiont of Camponotus sp.	7.94e-07	0	1.07e-05	0	0	1.03e-07	7e-08	2.82e-06	8.53e-06	0	1.07e-07	1.47e-05	4.84e-07	1.76e-05	9.01e-07
Blochmannia endosymbiont of Polyrhachis (Hedomyrma) turneri	1.59e-06	2.61e-06	8.21e-06	1.11e-07	6.29e-08	2.06e-07	0	3.45e-06	1.46e-05	0	1.07e-07	6.68e-06	0	7.16e-07	7.4e-06
Bordetella avium	4.44e-05	4.96e-05	1.72e-06	1.44e-06	4.41e-07	8.64e-06	3.95e-06	1.1e-06	2.02e-06	6.81e-07	1.61e-06	0.000146912	4.84e-06	7.16e-07	6.76e-06
Bordetella bronchialis	2.86e-05	5.4e-05	1.23e-06	1.14e-05	1.07e-06	4.94e-06	1.43e-06	1.1e-06	1.4e-06	1.41e-06	8.56e-07	0.000244408	3.02e-05	1.85e-05	6.76e-06
Bordetella bronchiseptica	3.13e-05	6.27e-05	5.88e-06	6.65e-07	0	2.06e-06	4.48e-06	1.25e-06	4.65e-07	5.84e-07	1.18e-06	0.000109516	3.63e-06	5.21e-07	2.77e-06
Bordetella flabilis	3.97e-05	0.000110566	3.06e-07	2.33e-06	1.56e-05	2.57e-06	4.55e-07	3.14e-07	6.2e-07	6.81e-07	8.56e-07	0.000231052	9.63e-06	1.04e-06	4.31e-06
Bordetella genomosp. 13	3.41e-05	0.000134942	1.53e-06	3.77e-06	0	4.73e-06	4.9e-07	2.35e-06	0	3.41e-07	2.03e-06	0.00021369	2e-05	7.16e-07	7.46e-06
Bordetella genomosp. 6	3.17e-06	9.58e-06	0	3.32e-07	0	6.17e-07	1.05e-07	0	0	1.46e-07	4.28e-07	1.87e-05	2.6e-06	0	4.5e-07
Bordetella genomosp. 8	4.32e-05	7.92e-05	2.27e-06	3.43e-06	0	4.73e-06	9.8e-07	7.84e-07	4.65e-07	9.73e-07	1.61e-06	0.000223039	1.06e-05	2.6e-07	3.47e-06
Bordetella genomosp. 9	3.29e-05	8.01e-05	1.53e-06	1.88e-06	0	4.32e-06	6.65e-07	4.71e-07	0	2.92e-07	1.5e-06	0.000223039	8.17e-06	1.89e-06	8.17e-06
Bordetella hinzii	7.9e-05	6.96e-05	3.06e-07	3.21e-06	0	6.79e-06	4.2e-07	7.84e-07	6.2e-07	2.24e-06	1.82e-06	0.00017763	2.48e-05	2.08e-06	8.24e-06
Bordetella holmesii	2.3e-05	0.000106213	6.13e-08	2.44e-06	0	5.25e-06	2.1e-07	4.71e-07	9.3e-07	1.99e-06	1.07e-06	0.0001202	1.15e-06	1.95e-07	4.76e-06
Bordetella parapertussis	9.52e-06	4.35e-06	0	0	0	1.96e-06	2.1e-07	1.57e-07	0	4.86e-08	1.07e-07	1.07e-05	2.12e-06	1.95e-07	1.93e-07
Bordetella petrii	5.44e-05	0.000119272	8.58e-07	2.33e-06	0	5.45e-06	5.25e-07	1.88e-06	9.3e-07	5.84e-07	2.89e-06	0.000197663	2.28e-05	1.69e-06	6.56e-06
Bordetella pseudohinzii	3.41e-05	6.79e-05	3.98e-06	1.55e-06	5.04e-07	4.53e-06	3.64e-06	0	4.65e-07	1.65e-06	7.49e-07	0.000102838	1.97e-05	7.81e-07	4.5e-06
Bordetella sp. H567	2.62e-05	6.09e-05	2.27e-06	3.77e-06	0	3.5e-06	9.8e-07	6.27e-07	1.86e-06	5.35e-07	8.56e-07	0.00020167	1.28e-05	7.16e-07	4.83e-06
Bordetella sp. N	6.59e-05	8.1e-05	9.74e-06	6.98e-06	7.55e-06	4.84e-06	5.56e-06	3.14e-06	1.09e-06	1.65e-06	1.61e-06	0.000193656	1.61e-05	2.13e-05	8.94e-06
Bordetella trematum	4.29e-05	0.000127107	1.84e-06	4.1e-06	6.29e-08	5.56e-06	2.27e-06	6.27e-06	3.1e-07	4.86e-07	1.61e-06	0.000173623	2.33e-05	4.55e-07	2.32e-06
Bosea sp. ANAM02	1.79e-05	0.000649465	0	1.99e-06	0	4.43e-06	3.5e-07	3.61e-06	6.2e-07	1.95e-07	1.18e-06	0.000236394	1.82e-06	1.3e-07	9.01e-06
Bosea sp. AS-1	1.55e-05	0.00129109	0	4.76e-06	0	3.09e-06	2.8e-07	4.71e-07	0	4.86e-08	1.07e-07	0.00023773	4.18e-06	2.6e-07	3.8e-06
Bosea sp. F3-2	2.42e-05	0.00129371	3.92e-06	3.66e-06	0	2.16e-06	1.82e-06	4.71e-07	3.1e-07	2.48e-06	7.49e-07	0.000260434	3.15e-06	2.6e-07	5.6e-06
Bosea sp. NBC_00550	2.94e-05	0.000937632	9.19e-07	4.1e-06	6.29e-08	2.37e-06	2.8e-07	3.14e-07	0	3.89e-07	3.21e-07	0.000303172	1.88e-06	1.17e-06	9.14e-06
Bosea sp. PAMC 26642	2.66e-05	0.00177428	2.7e-06	2.88e-06	6.29e-08	3.5e-06	1.54e-06	4.71e-07	0	9.73e-08	0	0.000343239	8.9e-06	7.87e-06	9.72e-06
Bosea sp. RAC05	8.09e-05	0.00179343	0	6.09e-06	0	8.75e-06	5.95e-07	7.84e-07	1.55e-07	5.79e-06	3.21e-07	0.000339233	3.75e-06	6.51e-08	3.37e-05
Bosea sp. REN20	1.47e-05	0.000969844	0	3.55e-06	0	3.81e-06	1.4e-07	0	1.55e-07	0	2.14e-07	0.00021369	1.57e-06	1.17e-06	7.46e-06
Bosea sp. Tri-49	2.42e-05	0.00139295	6.74e-07	2.99e-06	0	1.85e-06	5.25e-07	7.84e-06	1.55e-07	0	3.75e-06	0.000288481	5.51e-06	3.9e-07	6.18e-06
Bosea vaviloviae	5.16e-05	0.00254475	1.02e-05	5.76e-06	8.18e-07	7.41e-06	4.09e-06	1.88e-06	3.1e-07	9.73e-07	1.82e-06	0.000659767	1.63e-05	3.9e-07	1.42e-05
Bosea vestrisii	1.71e-05	0.00145564	0	5.32e-06	6.29e-08	3.09e-06	6.3e-07	2.35e-06	1.55e-07	0	1.18e-06	0.000284475	8.78e-06	1.95e-06	5.47e-06
Botrimarina mediterranea	7.94e-06	4e-05	0	1.33e-06	0	1.44e-06	3.5e-08	1.25e-06	0	0	0	0.000320535	2.12e-06	0	1.35e-06
Boudabousia tangfeifanii	1.43e-05	8.71e-05	0	0	0	1.17e-05	2.8e-07	3.14e-07	3.1e-07	3.89e-07	0	1.47e-05	3.03e-07	6.51e-08	1.29e-07
Brachybacterium avium	3.97e-06	1.48e-05	0	3.32e-07	1.26e-07	1.03e-07	2.1e-07	1.57e-07	0	0	2.14e-07	5.08e-05	3.63e-06	0	3.6e-06
Brachybacterium faecium	8.73e-06	1.92e-05	6.13e-08	2.22e-07	6.29e-08	7.2e-07	4.55e-07	1.57e-07	0	0	6.42e-07	7.61e-05	5.45e-07	0	2.83e-06
Brachybacterium ginsengisoli	1.11e-05	2.79e-05	0	9.97e-07	0	8.23e-07	2.1e-07	0	0	4.86e-08	4.28e-07	6.54e-05	6.05e-07	7.16e-07	3.41e-06
Brachybacterium halotolerans	4.76e-06	5.22e-06	0	8.86e-07	0	7.2e-07	4.55e-07	0	0	0	0	7.08e-05	4.84e-07	0	7.72e-07
Brachybacterium huguangmaarense	1.98e-06	3.57e-05	0	7.76e-07	0	4.53e-06	3.15e-07	0	0	1.46e-07	0	6.28e-05	4.48e-06	0	9.01e-07
Brachybacterium kimchii	3.57e-06	1.22e-05	6.13e-08	3.32e-07	6.29e-08	5.15e-07	1.75e-07	0	0	0	0	4.41e-05	6.66e-07	1.95e-07	1.03e-06
Brachybacterium saurashtrense	6.35e-06	1.48e-05	2.45e-07	4.43e-07	0	6.17e-07	2.1e-07	0	6.2e-07	0	1.28e-06	6.81e-05	6.66e-07	0	1.8e-06
Brachybacterium sp. GU-2	9.52e-06	1.92e-05	0	7.76e-07	0	1.96e-06	2.8e-07	0	0	0	0	6.14e-05	9.69e-07	0	2.06e-06
Brachybacterium sp. P6-10-X1	1.03e-05	1.74e-05	0	7.76e-07	0	6.17e-07	2.45e-07	1.57e-07	6.2e-07	4.86e-08	5.35e-07	5.34e-05	3.63e-07	1.95e-07	3.8e-06
Brachybacterium sp. Z12	1.98e-06	5.22e-06	0	9.97e-07	0	3.09e-07	6.3e-07	0	1.55e-07	0	1.07e-07	5.88e-05	5.39e-06	6.51e-08	5.79e-06
Brachybacterium vulturis	5.16e-06	8.71e-06	0	9.97e-07	0	1.03e-07	2.8e-07	3.14e-07	1.55e-07	4.86e-08	6.42e-07	6.81e-05	7.87e-07	0	6.56e-06
Bradymonas sediminis	2.38e-06	1.48e-05	0	2.22e-07	0	1.03e-07	7e-08	7.84e-07	0	0	0	0.000142905	4.24e-07	0	9.01e-07
Bradyrhizobium amphicarpaeae	2.54e-05	0.000163672	0	6.65e-07	0	4.12e-07	1.05e-07	0	0	6.32e-07	0	0.000255092	1.03e-06	0	1.48e-06
Bradyrhizobium arachidis	4.6e-05	0.00051104	0	1.11e-06	9.44e-07	1.75e-06	7e-08	0	0	0	3.85e-06	0.00078531	7.75e-06	3.12e-06	3.86e-06
Bradyrhizobium australafricanum	9.52e-06	1.31e-05	3.06e-07	1.11e-06	0	1.23e-06	3.5e-08	3.14e-07	0	2.92e-07	1.07e-07	0.000126878	6.05e-07	1.04e-06	3.86e-07
Bradyrhizobium barranii	2.06e-05	0.000334309	5.88e-06	3.32e-06	0	1.54e-06	1.05e-07	1.57e-07	0	0	3.21e-07	0.000448749	4.96e-06	4.55e-07	2.96e-06
Bradyrhizobium betae	1.43e-05	0.000152354	0	8.86e-07	0	2.68e-06	0	3.14e-07	1.55e-07	0	1.07e-07	0.000594325	2.18e-06	1.95e-07	2.96e-06
Bradyrhizobium brasilense	1.55e-05	0.000114919	4.66e-06	6.65e-07	0	1.03e-06	1.92e-06	0	0	0	1.07e-07	0.00017763	1.21e-07	0	2.57e-07
Bradyrhizobium canariense	9.21e-05	0.000580688	2.76e-06	7.76e-07	0	1.44e-06	4.2e-07	2.82e-06	4.65e-07	1.95e-07	7.49e-07	0.00110317	8.96e-06	1.3e-07	1.04e-05
Bradyrhizobium commune	1.98e-05	0.00010273	1.23e-07	1.55e-06	0	9.26e-07	1.4e-07	0	0	4.86e-08	3.75e-06	0.000471453	8.9e-06	0	2.9e-06
Bradyrhizobium cosmicum	3.77e-05	0.000231579	7.47e-06	1.11e-06	1.26e-07	6.17e-07	2.9e-06	5.33e-06	1.55e-07	0	1.07e-07	0.000459433	2.85e-06	6.51e-07	2.44e-06
Bradyrhizobium daqingense	1.27e-05	0.000190661	0	2.22e-07	0	8.23e-07	1.75e-07	0	0	4.86e-07	0	0.000209683	1.57e-06	0	1.29e-06
Bradyrhizobium diazoefficiens	9.64e-05	0.000602453	3.68e-07	1.01e-05	1.32e-06	5.76e-06	8.05e-07	2.82e-06	7.75e-07	9.73e-08	3.53e-06	0.00148247	7.45e-06	7.16e-06	1.29e-05
Bradyrhizobium elkanii	4.44e-05	0.000249861	9.5e-06	1.77e-06	0	1.65e-06	3.5e-06	4.08e-06	0	3.41e-07	5.35e-07	0.000512855	2.24e-06	7.16e-07	2.64e-06
Bradyrhizobium erythrophlei	0.000395985	0.00106474	3.06e-07	6.2e-06	6.29e-08	4.12e-06	3.15e-07	1.57e-06	9.3e-07	1.26e-06	2.89e-06	0.00415226	1.88e-05	2.6e-06	1.34e-05
Bradyrhizobium genosp. L	4.21e-05	0.000122754	0	1.22e-06	6.29e-08	1.03e-06	1.05e-07	3.14e-07	4.65e-07	0	1.07e-07	0.00063172	9.26e-06	1.63e-06	3.99e-06
Bradyrhizobium guangdongense	2.7e-05	8.71e-05	0	8.86e-07	0	2.26e-06	3.5e-08	0	0	8.76e-07	7.49e-07	0.000364608	3.69e-06	0	2.19e-06
Bradyrhizobium guangxiense	1.39e-05	0.000468381	3.19e-06	5.54e-07	0	7.2e-07	5.6e-07	0	0	1.46e-07	2.14e-07	0.000280468	3.09e-06	2.6e-07	1.54e-06
Bradyrhizobium guangzhouense	2.38e-05	8.44e-05	0	1.77e-06	6.29e-08	8.23e-07	2.45e-07	0	0	1.46e-07	1.07e-07	0.000367279	4.3e-06	7.81e-07	1.74e-06
Bradyrhizobium icense	0.000107924	0.000162802	1.59e-06	2.88e-06	1.26e-07	1.13e-06	3.85e-07	4.39e-06	0	0	1.28e-06	0.00070117	2.85e-06	1.3e-07	5.21e-06
Bradyrhizobium japonicum	5.12e-05	0.000224614	8.15e-06	8.64e-06	1.26e-07	2.88e-06	4.69e-06	6.9e-06	1.55e-07	1.44e-05	8.56e-07	0.000816028	8.78e-06	2.6e-07	4.25e-06
Bradyrhizobium lablabi	9.88e-05	0.000470993	0	2.22e-06	0	8.23e-07	3.5e-07	2.04e-06	1.55e-07	0	7.49e-07	0.00147446	1.49e-05	2.6e-07	6.69e-06
Bradyrhizobium oligotrophicum	4.48e-05	0.000269885	4.29e-07	8.86e-07	6.29e-08	8.23e-07	1.36e-06	1.57e-07	1.55e-07	3.89e-07	1.39e-06	0.000994993	5.09e-06	1.3e-07	3.67e-06
Bradyrhizobium ottawaense	1.15e-05	7.14e-05	0	5.54e-07	0	7.2e-07	3.5e-08	0	0	0	1.07e-07	0.000182972	7.26e-07	0	7.4e-06
Bradyrhizobium pachyrhizi	1.86e-05	3.13e-05	0	3.32e-07	0	2.06e-07	0	0	1.55e-07	1.46e-06	1.07e-07	0.000196327	7.26e-07	7.16e-07	5.15e-07
Bradyrhizobium paxllaeri	9.88e-05	0.00039351	0	1.22e-06	0	1.34e-06	3.5e-08	6.27e-07	0	4.86e-08	0	0.000702505	3.03e-06	1.95e-07	5.53e-06
Bradyrhizobium quebecense	4.8e-05	0.000238543	0	6.65e-07	0	9.26e-07	5.6e-07	0	0	9.73e-08	5.35e-07	0.000355259	1.76e-06	1.3e-07	1.93e-06
Bradyrhizobium sediminis	0.000195612	0.000690383	6.13e-08	4.43e-06	0	1.96e-06	2.41e-06	3.14e-06	0	4.86e-08	5.35e-07	0.0023399	1.16e-05	9.76e-07	1.59e-05
Bradyrhizobium septentrionale	2.38e-05	0.00017499	0	7.76e-07	4.41e-07	6.17e-07	7e-08	1.1e-06	0	0	0	0.00027379	1.45e-06	6.51e-08	1.99e-06
Bradyrhizobium sp.	5.95e-06	3.13e-05	0	1.11e-06	0	0	5.25e-07	0	0	0	0	0.000110852	3.03e-07	2.6e-07	7.72e-07
Bradyrhizobium sp. 1(2017)	8.33e-06	4.79e-05	6.13e-08	5.54e-07	1.45e-06	5.15e-07	5.6e-07	6.27e-07	0	4.86e-08	3.21e-07	0.000257763	6.42e-06	6.51e-08	1.61e-06
Bradyrhizobium sp. 170	0.000232512	0.000169766	5.51e-06	1.77e-06	6.29e-08	1.65e-06	1.75e-07	3.14e-07	0	0	0	0.00112054	4.3e-06	3.38e-06	1.04e-05
Bradyrhizobium sp. 186	2.9e-05	0.000299485	3.9e-05	1.54e-05	0	2.26e-06	5.25e-07	5.02e-06	0	1.95e-07	3.21e-07	0.000484809	1.57e-06	9.76e-07	7.91e-06
Bradyrhizobium sp. 191	1.59e-05	0.000230708	3.68e-07	2.22e-07	0	6.17e-07	0	1.57e-07	3.1e-07	4.86e-08	0	0.000227045	3.63e-07	0	9.01e-07
Bradyrhizobium sp. 192	7.54e-06	1.13e-05	0	2.22e-07	0	8.23e-07	0	0	0	4.86e-08	0	5.88e-05	1.82e-07	6.51e-08	1.16e-06
Bradyrhizobium sp. 195	1.98e-05	0.000121883	0	6.65e-07	0	5.15e-07	7e-08	3.92e-06	1.55e-07	0	0	0.000299166	7.69e-06	1.95e-07	1.35e-06
Bradyrhizobium sp. 200	0.000209896	0.000411792	1.23e-07	8.86e-06	0	3.91e-06	1.05e-06	7.84e-07	1.55e-07	3.89e-07	2.14e-07	0.00114057	4.54e-06	7.81e-06	1.94e-05
Bradyrhizobium sp. 4	7.54e-06	3.31e-05	0	6.65e-07	5.04e-07	8.23e-07	0	0	0	0	1.07e-07	9.88e-05	9.08e-07	0	1.93e-06
Bradyrhizobium sp. 40	8.33e-06	9.32e-05	6.13e-08	0	0	3.09e-07	0	1.57e-07	1.4e-06	0	0	0.000110852	5.02e-06	0	5.79e-07
Bradyrhizobium sp. 41S5	2.42e-05	0.000169766	0	7.76e-07	0	6.17e-07	2.1e-06	1.57e-07	0	9.73e-08	6.42e-07	0.000256428	3.51e-06	1.3e-07	1.48e-06
Bradyrhizobium sp. 6(2017)	1.98e-05	0.000211555	6.13e-08	5.87e-06	0	1.23e-06	4.55e-07	3.14e-07	1.55e-07	3.41e-07	1.93e-06	0.000368615	2.42e-06	2.6e-07	4.25e-06
Bradyrhizobium sp. 62B	1.23e-05	4.96e-05	0	5.43e-06	0	3.19e-06	0	3.14e-07	0	4.86e-08	0	0.000113523	5.45e-07	0	1.16e-06
Bradyrhizobium sp. A19	3.61e-05	0.000726077	2.45e-07	2.33e-06	8.18e-07	1.34e-06	6.3e-07	6.27e-07	0	7.78e-07	9.63e-07	0.000981637	1.73e-05	0	4.12e-06
Bradyrhizobium sp. Ash2021	0.000137285	0.000370003	0	4.21e-06	0	4.12e-07	9.8e-07	6.75e-06	3.1e-07	8.76e-07	2.14e-07	0.00158932	4.06e-06	9.11e-07	1.4e-05
Bradyrhizobium sp. BTAi1	4.13e-05	0.000536287	6.13e-08	2.33e-06	0	2.88e-06	7e-07	0	1.09e-06	2.53e-06	9.63e-07	0.000825377	1.19e-05	5.86e-07	5.21e-06
Bradyrhizobium sp. C-145	1.94e-05	0.000136684	0	1.11e-07	0	1.03e-07	0	1.88e-06	0	0	0	0.000124207	6.11e-06	0	4.5e-07
Bradyrhizobium sp. CB1015	1.11e-05	8.97e-05	0	9.97e-07	0	9.26e-07	3.5e-08	2.51e-06	0	0	1.07e-07	0.000193656	7.87e-07	2.6e-07	9.01e-07
Bradyrhizobium sp. CB1024	2.14e-05	0.000127107	4.29e-07	6.65e-07	0	7.2e-07	3.5e-08	0	0	1.02e-06	8.56e-07	0.000287146	1.03e-06	6.51e-08	1.99e-06
Bradyrhizobium sp. CB1650	2.3e-05	0.000285556	0	3.66e-06	0	1.85e-06	1.64e-06	6.27e-07	7.75e-07	1.02e-06	7.49e-07	0.000471453	1.45e-06	1.11e-06	2.19e-06
Bradyrhizobium sp. CB1717	9.92e-06	4e-05	1.16e-06	1.66e-06	0	6.17e-07	1.05e-07	0	0	1.46e-07	9.63e-07	0.000227045	6.66e-07	6.51e-08	9.65e-07
Bradyrhizobium sp. CB2312	1.79e-05	4.61e-05	6.13e-08	2.77e-06	0	1.23e-06	0	3.14e-07	1.55e-07	0	1.5e-06	0.000264441	1.39e-06	2.6e-07	2.12e-06
Bradyrhizobium sp. CB3035	1.15e-05	9.58e-05	0	4.43e-07	0	7.2e-07	3.5e-08	1.57e-07	0	0	0	0.00023773	1.03e-06	2.6e-07	1.54e-06
Bradyrhizobium sp. CB3481	0.000148792	0.000440522	6.13e-08	3.66e-06	6.29e-08	4.12e-07	2.45e-07	0	1.55e-07	0	7.49e-07	0.000876128	5.39e-06	1.95e-07	7.91e-06
Bradyrhizobium sp. CB82	4.88e-05	0.000127978	1.23e-07	7.31e-06	8.81e-07	2.98e-06	2.83e-06	1.25e-06	9.3e-06	5.35e-07	1.07e-07	0.000641069	2.24e-06	4.29e-06	3.28e-06
Bradyrhizobium sp. CCBAU 051011	0.000109908	0.000325603	0	1.99e-06	6.92e-07	1.65e-06	0	1.57e-07	0	2.92e-07	2.14e-07	0.000814692	3.33e-06	6.51e-08	5.92e-06
Bradyrhizobium sp. CCBAU 51753	6.27e-05	0.000451839	6.13e-08	1.24e-05	6.29e-08	3.19e-06	1.4e-06	0	1.55e-06	4.86e-08	4.28e-07	0.000647747	5.33e-06	3.25e-07	4.57e-06
Bradyrhizobium sp. CCBAU 51765	1.59e-05	0.000133201	0	3.32e-07	0	0	7e-08	1.57e-07	0	1.41e-06	5.35e-07	0.00017763	1.88e-06	1.3e-07	1.29e-05
Bradyrhizobium sp. CCBAU 53338	7.94e-06	1.31e-05	0	5.54e-07	0	0	0	1.57e-07	0	0	5.35e-07	8.81e-05	4.84e-07	6.51e-08	3.86e-07
Bradyrhizobium sp. CCBAU 53340	2.5e-05	3.05e-05	0	1.44e-06	0	5.15e-07	0	7.37e-06	0	1.22e-06	7.49e-07	0.000315192	2e-06	1.95e-07	1.8e-06
Bradyrhizobium sp. CCBAU 53351	8.33e-06	5.75e-05	0	1.11e-06	0	8.23e-07	0	0	1.55e-07	1.95e-07	0	0.000121536	7.26e-07	6.51e-08	4.5e-07
Bradyrhizobium sp. CCBAU 53421	3.29e-05	0.000178472	0	1.44e-06	0	1.13e-06	0	6.27e-07	8.68e-06	4.86e-08	2.14e-07	0.000411353	1.09e-06	1.24e-06	1.06e-05
Bradyrhizobium sp. CCGE-LA001	1.98e-05	0.00014626	0	3.32e-07	0	5.15e-07	2.45e-07	1.57e-07	0	1.46e-07	0	0.000255092	1.88e-06	4.55e-07	1.22e-06
Bradyrhizobium sp. CIAT3101	2.5e-05	0.00035085	4.04e-06	1.88e-06	0	7.2e-07	1.47e-06	0	4.65e-07	4.86e-08	1.82e-06	0.000415359	2.42e-06	1.3e-07	1.74e-06
Bradyrhizobium sp. I71	1.35e-05	0.000181955	0	1.55e-06	0	4.12e-07	3.5e-08	0	0	4.86e-08	1.07e-07	0.000291152	7.26e-07	0	1.16e-06
Bradyrhizobium sp. NC92	3.57e-06	1.31e-05	6.13e-07	4.43e-07	2.39e-06	1.03e-07	3.15e-07	1.57e-07	1.55e-07	0	2.14e-07	5.88e-05	2.85e-06	3.38e-06	5.15e-07
Bradyrhizobium sp. NP1	6.43e-05	0.000518005	1.23e-07	2.44e-06	0	1.54e-06	0	4.71e-07	3.1e-07	8.76e-07	8.56e-07	0.00116595	1.22e-05	8.46e-07	5.92e-06
Bradyrhizobium sp. ORS 278	3.33e-05	0.000414404	0	2.55e-06	0	2.06e-06	3.5e-08	0	1.55e-07	6.32e-07	7.49e-07	0.000697163	3.39e-06	2.6e-07	1.02e-05
Bradyrhizobium sp. ORS 285	4.72e-05	0.000220261	0	1.66e-06	0	9.26e-07	4.9e-07	1.57e-07	3.1e-07	0	7.49e-07	0.000766612	5.45e-06	7.81e-07	3.54e-06
Bradyrhizobium sp. S12-14-2	0.000938381	0.000486663	1.65e-06	4.43e-06	6.29e-08	4.01e-06	4.55e-07	9.41e-07	1.55e-07	1.95e-07	1.71e-06	0.00181903	1.48e-05	2.28e-06	2.43e-05
Bradyrhizobium sp. SK17	4.29e-05	0.000273367	2.45e-07	7.76e-07	0	1.44e-06	2.45e-07	1.73e-06	4.65e-07	0	6.42e-07	0.000466111	2.24e-06	4.55e-07	3.47e-06
Bradyrhizobium sp. TM102	1.59e-06	7.84e-06	0	2.22e-07	0	0	0	0	0	3.84e-06	0	2e-05	0	0	1.93e-07
Bradyrhizobium sp. WD16	3.73e-05	0.00048144	1.19e-05	1.77e-06	0	2.06e-06	2.48e-06	1.41e-06	1.55e-07	0	2.14e-07	0.000933557	3.63e-06	5.21e-07	6.69e-06
Bradyrhizobium symbiodeficiens	2.18e-05	2.61e-05	0	8.86e-07	0	8.23e-07	0	0	3.1e-07	4.86e-08	6.42e-07	0.000212354	9.69e-07	0	3.09e-06
Bradyrhizobium vignae	1.59e-05	0.000136684	0	3.55e-06	0	6.17e-07	0	7.84e-07	1.55e-07	8.76e-07	2.14e-07	0.000283139	4.66e-06	1.3e-07	1.29e-06
Bradyrhizobium xenonodulans	1.51e-05	0.000202849	2.76e-06	1.11e-06	0	8.23e-07	3.85e-07	3.14e-07	0	1.75e-06	7.49e-07	0.000301837	1.88e-06	1.95e-07	1.8e-06
Bradyrhizobium zhanjiangense	3.97e-06	0.000141037	0	1.11e-07	0	3.09e-07	3.5e-08	0	0	0	3.21e-07	0.000117529	3.03e-06	2.08e-06	4.5e-07
Brasilonema sennae	0	1.92e-05	4.29e-06	3.32e-07	0	0	0	1.57e-07	0	9.73e-08	0	2.8e-05	4.48e-06	4.55e-07	3.86e-07
Bremerella sp. P1	1.79e-05	1.48e-05	2.45e-06	1.11e-07	0	3.09e-07	3.5e-07	0	0	0	0	0.000104174	9.08e-07	0	7.72e-07
Bremerella volcania	2.94e-05	2.79e-05	6.13e-08	7.76e-07	0	3.09e-07	3.5e-08	4.71e-07	1.55e-07	0	1.28e-06	0.000260434	6.66e-07	5.21e-07	9.65e-07
Brenneria goodwinii	1.86e-05	2.87e-05	4.84e-06	7.57e-05	1.83e-06	1.99e-05	4.06e-06	2.32e-05	4.87e-05	5.59e-06	3.38e-05	6.68e-05	3.21e-05	0.00025857	5.02e-06
Brenneria izadpanahii	2.34e-05	5.22e-06	2.45e-07	7e-05	3.21e-06	3.12e-05	3.64e-06	2.84e-05	2.95e-05	7.49e-06	3.93e-05	3.87e-05	5.71e-05	0.000185762	1.74e-06
Brenneria rubrifaciens	2.14e-05	1.04e-05	1.23e-07	9.67e-05	4.03e-06	2.21e-05	1.36e-06	2.29e-05	6.13e-05	5.25e-06	4.35e-05	7.61e-05	4.69e-05	0.000160516	2.12e-06
Breoghania sp. L-A4	1.43e-05	0.000552829	6.13e-08	6.65e-07	0	1.75e-06	6.65e-07	4.08e-06	0	4.86e-08	2.14e-07	0.00038197	3.45e-06	1.3e-07	2.44e-06
Brevefilum fermentans	4.36e-06	4.35e-06	0	0	3.78e-07	0	3.5e-08	3.14e-07	0	0	0	0.000215025	3.09e-06	6.51e-08	8.36e-07
Brevibacillus brevis	1.86e-05	5.48e-05	1.23e-07	1.88e-06	0	4.73e-06	1.05e-07	3.14e-07	0	2.92e-07	6.42e-07	0.000145576	6.78e-06	1.3e-06	7.72e-07
Brevibacillus choshinensis	1.15e-05	2.61e-06	1.23e-07	1.11e-07	2.52e-07	9.26e-07	1.75e-07	0	2.17e-06	0	4.28e-07	5.61e-05	2.42e-07	7.81e-07	9.65e-07
Brevibacillus laterosporus	4.36e-06	9.58e-06	5.87e-05	2.22e-07	6.92e-07	5.15e-07	0	4.71e-07	3.1e-07	0	2.14e-07	3.07e-05	4.84e-07	2.34e-06	3.86e-07
Brevibacillus marinus	2.78e-06	5.22e-06	1.23e-07	3.32e-07	0	3.09e-07	1.4e-07	1.57e-07	0	0	1.07e-07	6.14e-05	1.21e-07	1.43e-06	1.93e-07
Brevibacillus parabrevis	0	2.61e-06	0	0	0	2.06e-07	0	4.55e-06	0	0	0	1.47e-05	0	4.62e-06	0
Brevibacillus sp. BB3-R1	9.92e-06	6.09e-06	3e-06	1.11e-07	1.01e-06	9.26e-07	2.8e-07	4.24e-06	0	0	0	3.34e-05	3.03e-07	6.51e-08	3.86e-07
Brevibacillus sp. WF146	1.19e-06	5.66e-05	0	6.65e-07	7.81e-06	1.44e-06	0	1.57e-07	4.65e-07	0	0	6.14e-05	2.42e-07	0	2.57e-07
Brevibacterium aurantiacum	3.17e-06	1.04e-05	0	5.54e-07	0	5.15e-07	1.75e-07	0	0	0	0	1.74e-05	2.42e-07	1.55e-05	4.83e-06
Brevibacterium casei	3.97e-06	7.23e-05	0	1.99e-06	0	6.38e-06	3.5e-08	1.57e-07	3.1e-07	4.86e-08	4.28e-07	7.61e-05	4.24e-07	6.51e-08	1.8e-06
Brevibacterium limosum	6.35e-06	6.09e-06	0	4.43e-07	0	4.12e-07	0	0	0	7.05e-06	0	1.74e-05	1.82e-07	0	6.43e-07
Brevibacterium linens	3.97e-06	2.18e-05	0	4.43e-07	0	1.03e-06	1.75e-07	0	0	0	0	3.47e-05	1.21e-07	6.51e-08	7.33e-06
Brevibacterium luteolum	8.33e-06	2.87e-05	0	3.77e-06	0	4.73e-06	4.2e-07	0	0	0	0	4.54e-05	1.21e-06	1.3e-07	1.09e-06
Brevibacterium oceani	5.55e-06	6.96e-05	0	3.32e-07	0	1.03e-07	2.8e-07	1.1e-06	0	4.86e-08	0	3.34e-05	4.24e-07	0	5.15e-07
Brevibacterium sandarakinum	1.63e-05	1.48e-05	0	1.11e-07	0	2.37e-06	4.55e-07	0	0	0	0	3.21e-05	6.05e-08	1.3e-07	1.74e-06
Brevibacterium siliguriense	3.97e-06	1.57e-05	1.23e-06	1.11e-07	0	1.34e-06	5.25e-07	0	0	0	2.14e-07	1.87e-05	3.03e-07	7.16e-07	3.86e-07
Brevibacterium sp. BRM-1	5.55e-06	7.84e-06	1.84e-07	3.32e-07	0	2.06e-07	0	4.71e-07	0	0	0	8.28e-05	9.08e-07	6.51e-08	7.08e-07
Brevibacterium sp. CS2	3.97e-06	2.61e-05	0	2.22e-07	6.29e-08	1.65e-06	2.8e-07	0	0	0	0	6.68e-05	6.05e-07	6.51e-08	7.08e-07
Brevibacterium sp. JSBI002	1.59e-06	1.65e-05	0	2.22e-07	5.29e-06	6.17e-07	2.1e-07	0	0	0	0	1.74e-05	6.05e-08	0	4.5e-07
Brevibacterium sp. SMBL_HHYL_HB1	3.97e-06	1.13e-05	1.84e-07	0	0	8.23e-07	2.45e-07	0	0	4.86e-08	3.21e-07	4.27e-05	3.63e-07	0	2.57e-06
Brevibacterium spongiae	3.57e-06	1.83e-05	0	1.33e-06	0	1.03e-07	1.4e-07	0	0	0	1.07e-07	4.54e-05	7.87e-07	0	7.72e-07
Brevirhabdus pacifica	1.59e-05	0.000169766	6.13e-08	8.86e-07	0	1.03e-07	3.5e-08	0	0	0	2.14e-07	8.41e-05	3.15e-06	0	1.87e-06
Brevundimonas albigilva	2.5e-05	3.31e-05	0	2.1e-06	0	1.13e-06	3.5e-08	6.27e-07	0	5.84e-06	3.21e-07	0.000110852	1.27e-06	1.3e-07	8.04e-06
Brevundimonas diminuta	5.95e-06	1.48e-05	6.13e-08	2.55e-06	0	6.17e-07	1.05e-07	0	3.1e-07	0	2.35e-06	8.28e-05	4.24e-07	0	4.76e-06
Brevundimonas fontaquae	3.57e-06	1.74e-06	0	1.11e-06	3.78e-06	2.06e-07	0	0	0	8.76e-07	0	4.54e-05	4.24e-07	0	1.87e-06
Brevundimonas goettingensis	4.21e-05	0.000103601	1.23e-07	8.09e-06	6.29e-08	5.04e-06	4.55e-07	0	3.1e-07	3.41e-07	7.49e-07	0.000450084	2.6e-06	0	2.05e-05
Brevundimonas mediterranea	8.73e-06	8.88e-05	3.86e-06	1.88e-06	0	1.54e-06	1.26e-06	1.57e-07	1.55e-07	4.86e-08	0	9.62e-05	7.87e-07	1.3e-07	7.85e-06
Brevundimonas naejangsanensis	1.51e-05	1.92e-05	0	4.1e-06	1.89e-07	2.06e-06	1.05e-07	1.57e-07	6.2e-07	5.35e-07	9.63e-07	0.000149583	6.78e-06	0	9.46e-06
Brevundimonas nasdae	1.39e-05	0.000115789	6.43e-06	3.88e-06	0	1.03e-06	2.38e-06	9.41e-07	4.65e-07	1.46e-07	4.28e-07	6.68e-05	5.87e-06	5.21e-07	6.76e-06
Brevundimonas pondensis	1.07e-05	1.57e-05	3.68e-07	2.1e-06	0	1.13e-06	1.4e-07	1.57e-07	0	9.73e-08	5.35e-07	0.000106845	1.39e-06	7.16e-07	1.1e-05
Brevundimonas sp.	3.61e-05	0.00010273	1.84e-07	5.32e-06	0	1.54e-06	2.1e-06	4.71e-07	0	5.84e-07	3.21e-07	0.000169616	7.57e-06	1.3e-07	2.55e-05
Brevundimonas sp. AJA228-03	8.33e-06	1.65e-05	4.29e-06	1.88e-06	0	1.44e-06	1.61e-06	1.57e-07	0	2.43e-07	1.07e-07	0.000102838	1.15e-06	0	6.05e-06
Brevundimonas sp. Bb-A	5.16e-06	5.31e-05	0	8.86e-07	0	3.09e-07	3.5e-08	0	0	0	0	2e-05	9.69e-07	0	1.93e-06
Brevundimonas sp. BT-123	5.95e-06	1.04e-05	6.13e-08	3.32e-07	0	3.09e-07	0	0	0	0	0	3.21e-05	1.33e-06	0	1.54e-06
Brevundimonas sp. DS20	3.17e-06	7.84e-06	0	7.76e-07	0	6.17e-07	3.5e-08	0	0	0	0	3.47e-05	2.48e-06	0	2.7e-06
Brevundimonas sp. GW460-12-10-14-LB2	1.63e-05	1.04e-05	2.88e-06	9.97e-07	0	5.15e-07	1.4e-06	0	0	5.84e-07	0	2.54e-05	3.15e-06	6.51e-08	2.32e-06
Brevundimonas sp. LM2	2.3e-05	3.4e-05	2.45e-07	2.66e-06	0	1.75e-06	0	3.14e-07	4.65e-07	0	2.35e-06	0.000141569	8.6e-06	3.25e-07	1.52e-05
Brevundimonas sp. M20	2.34e-05	0.000109695	7.35e-07	5.54e-06	6.29e-08	2.26e-06	5.6e-07	0	0	1.02e-06	0	8.68e-05	1.39e-06	6.51e-08	1.59e-05
Brevundimonas sp. MF30-B	1.27e-05	7.57e-05	0	2.55e-06	0	3.6e-06	0	7.84e-07	6.2e-07	1.95e-07	0	0.000100167	1.07e-05	0	8.36e-06
Brevundimonas sp. NIBR10	3.13e-05	3.66e-05	7.96e-07	6.2e-06	9.44e-07	2.88e-06	5.95e-07	1.57e-07	7.75e-07	0	1.18e-06	0.000174958	6.78e-06	0	3.26e-05
Brevundimonas sp. NIBR11	4.76e-05	4e-05	4.9e-07	9.64e-06	1.26e-07	6.69e-06	2.8e-07	7.84e-07	0	4.86e-08	2.14e-07	0.000173623	3.69e-06	6.51e-08	2.82e-05
Brevundimonas sp. PAMC22021	1.31e-05	1.22e-05	0	3.77e-06	6.29e-08	1.65e-06	0	0	3.1e-07	4.86e-08	2.14e-07	0.000116194	1.39e-06	0	7.46e-06
Brevundimonas sp. SGAir0440	3.97e-06	6.96e-06	0	5.54e-07	0	6.17e-07	1.05e-07	5.33e-06	1.55e-07	0	2.14e-07	3.34e-05	6.05e-08	6.51e-08	1.54e-06
Brevundimonas sp. SL130	1.11e-05	2e-05	0	3.21e-06	0	1.54e-06	0	0	1.55e-07	0	2.14e-07	7.48e-05	7.33e-06	6.51e-08	5.73e-06
Brevundimonas subvibrioides	3.57e-05	3.13e-05	5.51e-06	5.87e-06	0	3.81e-06	3.5e-08	4.71e-07	3.1e-07	0	2.14e-07	0.000304508	4e-06	3.25e-07	2.28e-05
Brevundimonas vesicularis	2.1e-05	7.75e-05	3.68e-07	1.99e-06	0	1.75e-06	0	0	0	2.43e-07	2.14e-06	9.88e-05	1.01e-05	6.51e-08	6.5e-06
Brevundimonas vitisensis	1.07e-05	9.58e-05	2.88e-06	3.1e-06	0	1.23e-06	8.75e-07	9.41e-07	0	9.73e-08	0	0.000118865	8.48e-07	1.3e-07	1.06e-05
Brochothrix thermosphacta	7.94e-07	1.83e-05	0	3.32e-07	0	9.26e-07	3.5e-08	1.57e-07	0	0	0	5.08e-05	4.24e-07	3.9e-07	6.37e-06
Brooklawnia sp. SH051	2.78e-06	1.04e-05	0	6.65e-07	0	1.96e-06	3.5e-07	0	1.55e-07	0	1.07e-07	5.48e-05	4.24e-07	0	2.06e-06
Brucella anthropi	1.35e-05	0.000196755	0	7.42e-06	0	4.01e-06	2.31e-06	8.97e-05	1.55e-07	0	5.35e-07	3.87e-05	2e-06	1.41e-05	1.74e-06
Brucella intermedia	3.41e-05	0.000330827	0	5.54e-07	8.81e-07	4.84e-06	1.3e-05	0.000393906	1.55e-07	4.86e-08	5.35e-07	0.000137563	2.72e-06	3.84e-06	1.93e-06
Brucella pituitosa	1.39e-05	5.48e-05	1.23e-07	0	0	9.26e-07	4.13e-06	0.000127851	0	0	0	1.34e-05	1.21e-07	6.51e-07	2.57e-07
Brucella pseudintermedia	1.27e-05	2.44e-05	0	6.65e-07	0	4.12e-07	8.75e-06	8.28e-05	3.1e-07	4.86e-08	1.07e-07	8.01e-05	3.63e-07	1.11e-06	7.08e-07
Brucella pseudogrignonensis	6.39e-05	0.000111436	1.23e-07	6.65e-07	0	9.26e-07	7.59e-06	0.000271546	4.65e-07	0	1.71e-06	3.74e-05	2.42e-07	9.11e-07	5.15e-07
Brucella sp. 09RB8910	7.94e-07	0.00010186	0	0	0	3.09e-07	2.45e-07	3.61e-06	0	0	0	1.34e-06	1.21e-07	0	0
Brucella sp. 10RB9215	1.59e-06	6.96e-06	0	9.97e-07	0	0	6.75e-06	2.48e-05	1.55e-07	4.86e-08	0	1.2e-05	1.21e-07	0	0
Brucella sp. 6810	1.59e-06	1.74e-06	0	3.32e-07	0	0	7.35e-07	1.62e-05	1.55e-07	0	2.14e-07	8.01e-06	6.05e-08	0	1.29e-07
Brucella sp. BO2	1.98e-06	0	0	0	0	0	6.3e-07	1.65e-05	0	0	0	2.67e-06	0	0	0
Brucella sp. HL-2	8.73e-06	3.48e-06	6.13e-08	2.22e-07	0	5.15e-07	3.18e-06	0.000125027	0	0	3.21e-07	9.35e-06	1.82e-07	6.51e-08	3.86e-07
Brucella sp. MAB-22	2.38e-06	2.52e-05	0	2.22e-07	0	1.03e-07	1.15e-06	2.37e-05	0	0	0	6.68e-06	0	0	0
Brucella sp. NM4	1.75e-05	0.000188049	0	6.65e-07	0	1.34e-06	4.58e-06	0.000141813	3.1e-07	9.73e-08	4.28e-07	8.95e-05	2.72e-06	1.24e-06	2.83e-06
Buchnera aphidicola	0.00020077	0.000205461	0.000142797	4.54e-06	5.04e-07	6.48e-06	9.8e-07	8.78e-06	0.000122813	1.17e-06	1.71e-06	0.000431386	1.17e-05	1.37e-05	6.24e-06
Burkholderia aenigmatica	1.19e-06	1.74e-06	2.63e-06	7.76e-07	0	5.15e-07	6.65e-07	3.14e-07	0	0	5.03e-06	1.87e-05	2.36e-06	3.25e-07	5.79e-07
Burkholderia ambifaria	1.71e-05	4.53e-05	2.94e-06	1.66e-06	6.29e-08	3.4e-06	7.7e-07	7.84e-07	0	4.91e-06	5.35e-07	0.000152254	1.86e-05	1.95e-07	3.22e-06
Burkholderia anthina	9.13e-06	8.44e-05	6.13e-08	5.54e-07	0	1.85e-06	1.05e-07	3.14e-07	1.55e-07	2.43e-07	4.28e-07	4.67e-05	1.78e-05	6.51e-08	1.54e-06
Burkholderia arboris	1.98e-06	2.7e-05	8.03e-06	1.55e-06	1.89e-07	1.54e-06	3.85e-07	6.27e-07	4.65e-07	3.41e-07	1.61e-06	5.08e-05	8.48e-07	2.6e-07	1.09e-06
Burkholderia cenocepacia	3.85e-05	6.27e-05	1.23e-06	2.77e-06	1.26e-07	3.5e-06	2.1e-06	2.35e-06	6.2e-07	1.61e-06	7.28e-06	0.00028581	1.15e-05	6.51e-07	6.31e-06
Burkholderia cepacia	3.37e-05	8.36e-05	7.96e-07	5.21e-06	2.52e-07	6.69e-06	1.19e-06	2.98e-06	2.33e-06	1.7e-06	1.68e-05	0.000299166	1.04e-05	3.97e-06	8.49e-06
Burkholderia contaminans	3.09e-05	0.000110566	3.68e-07	2.88e-06	1.89e-07	7e-06	2.62e-06	5.18e-06	9.3e-07	1.12e-06	1.07e-06	0.000193656	2.38e-05	1.17e-06	9.33e-06
Burkholderia diffusa	3.97e-06	3.66e-05	0	1.24e-05	8.81e-07	4.12e-07	0	1.57e-07	0	1.46e-07	8.78e-06	2.8e-05	1.07e-05	0	9.01e-07
Burkholderia dolosa	1.15e-05	2.26e-05	1.35e-06	2.66e-06	1.89e-07	7.2e-07	1.08e-06	3.29e-06	1.24e-06	0	8.56e-07	0.000128214	3.81e-06	0	2.83e-06
Burkholderia gladioli	7.3e-05	0.000198496	7.17e-06	1.5e-05	1.26e-07	1.02e-05	3.95e-06	3.61e-06	4.19e-06	6.18e-06	7.6e-06	0.000548916	5.41e-05	4.75e-06	2.72e-05
Burkholderia glumae	2.98e-05	4.09e-05	5.27e-06	3.43e-06	2.52e-07	4.84e-06	8.4e-07	1.57e-06	2.48e-06	6.32e-07	9.63e-07	0.000263106	3.27e-05	1.11e-05	7.14e-06
Burkholderia lata	2.1e-05	2.26e-05	1.53e-05	2.44e-06	1.2e-06	2.57e-06	5.49e-06	1.73e-06	1.55e-06	1.51e-06	4.92e-06	9.88e-05	1.37e-05	7.16e-07	1.54e-06
Burkholderia latens	5.55e-06	3.66e-05	0	7.76e-07	0	7.2e-07	1.75e-07	1.25e-06	1.09e-06	2.92e-07	6.42e-07	0.000110852	1.05e-05	4.55e-07	2.64e-06
Burkholderia mayonis	1.39e-05	7.84e-05	9.19e-07	8.86e-07	0	1.75e-06	4.9e-07	4.55e-06	1.55e-07	0	7.49e-07	0.000133556	7.14e-06	6.51e-08	2.44e-06
Burkholderia metallica	5.16e-06	7.84e-06	0	6.65e-07	0	1.34e-06	3.15e-07	1.73e-06	9.3e-07	9.73e-07	2.35e-06	5.48e-05	4.84e-07	6.51e-08	2.64e-06
Burkholderia multivorans	3.17e-05	0.000120142	9.8e-07	7.64e-06	1.26e-07	4.53e-06	7.35e-07	1.32e-05	3.41e-06	5.35e-07	5.67e-06	0.000410017	3.9e-05	2.21e-06	1.87e-05
Burkholderia oklahomensis	7.14e-06	7.84e-06	4.29e-07	2.22e-07	0	1.03e-07	1.05e-07	0	0	9.73e-08	6.42e-07	7.48e-05	7.87e-07	1.43e-06	1.61e-06
Burkholderia perseverans	1.03e-05	1.92e-05	1.23e-07	2.33e-06	0	1.23e-06	7e-08	3.14e-07	7.75e-07	9.73e-08	4.28e-07	8.15e-05	2.91e-06	7.16e-07	2.7e-06
Burkholderia plantarii	1.79e-05	1.31e-05	5.51e-07	6.09e-06	0	4.84e-06	2.45e-07	1.57e-07	9.3e-07	5.84e-07	1.39e-06	0.000114858	4.12e-06	6.51e-07	2.83e-06
Burkholderia pseudomallei	4.96e-05	0.000174119	1.23e-07	2.22e-06	1.2e-06	4.53e-06	3.43e-06	7.37e-06	7.44e-06	2.11e-05	1.07e-06	0.000265777	1.64e-05	1.95e-07	1.14e-05
Burkholderia pseudomultivorans	9.13e-06	1.83e-05	4.29e-07	1.66e-06	1.26e-07	2.06e-06	1.05e-07	1.57e-07	4.65e-07	8.76e-07	3.21e-07	8.28e-05	1.18e-05	9.11e-07	1.93e-06
Burkholderia pyrrocinia	2.42e-05	0.000105342	6.13e-07	5.21e-06	4.41e-07	5.25e-06	7.14e-06	3.76e-06	1.4e-06	2.97e-06	9.42e-06	0.000145576	1.17e-05	1.43e-06	1.44e-05
Burkholderia savannae	3.97e-06	6.96e-06	1.84e-07	1.11e-07	0	1.03e-07	1.75e-07	0	0	0	0	2.8e-05	0	9.89e-06	2.57e-07
Burkholderia seminalis	1.27e-05	2.26e-05	0	5.54e-07	1.83e-06	1.13e-06	3.5e-08	1.57e-07	0	7.78e-07	8.56e-07	5.48e-05	7.26e-07	1.24e-06	1.61e-06
Burkholderia sp. Bp7605	8.73e-06	2.52e-05	2.45e-07	7.76e-07	0	1.54e-06	1.05e-06	6.27e-07	1.55e-07	9.73e-08	4.28e-07	0.000141569	8.54e-06	2.08e-06	3.67e-06
Burkholderia sp. DHOD12	2.22e-05	0.000108825	3.68e-07	3.66e-06	2.52e-07	4.63e-06	1.57e-06	1.1e-06	1.24e-06	1.95e-07	3.21e-07	0.000240401	1.48e-05	5.86e-07	6.82e-06
Burkholderia sp. FERM BP-3421	7.94e-06	4.35e-05	6.13e-08	5.98e-06	1.38e-06	1.96e-06	3.5e-08	4.71e-07	7.75e-07	1.17e-06	6.53e-06	0.000188314	1.97e-05	3.71e-06	3.99e-06
Burkholderia sp. IDO3	6.75e-06	1.83e-05	0	8.86e-07	4.41e-07	4.12e-07	1.05e-07	2.04e-06	1.09e-06	0	1.07e-07	5.08e-05	1.21e-07	6.51e-08	9.65e-07
Burkholderia sp. JSH-S8	7.54e-06	1.48e-05	1.23e-07	5.54e-07	0	1.03e-06	3.5e-08	7.84e-07	4.65e-07	2.43e-07	5.03e-06	7.88e-05	1.04e-05	1.3e-07	9.65e-07
Burkholderia sp. KBS0801	0	1.74e-06	0	2.22e-07	0	7.2e-07	0	0	0	7.3e-07	0	6.68e-06	5.87e-06	0	6.43e-08
Burkholderia sp. LA-2-3-30-S1-D2	9.52e-06	1.13e-05	6.13e-08	6.65e-07	0	6.17e-07	3.5e-08	4.71e-07	6.2e-07	5.84e-07	8.56e-07	4.67e-05	5.45e-07	1.3e-07	9.65e-07
Burkholderia sp. MSMB0856	3.97e-07	1.31e-05	0	4.43e-07	0	2.06e-07	7.35e-07	0	1.55e-07	2.43e-07	3.96e-06	2.4e-05	3.63e-06	6.51e-08	2.51e-06
Burkholderia sp. NRF60-BP8	3.57e-06	1.39e-05	0	5.54e-07	1.13e-05	1.13e-06	2.1e-07	1.73e-06	0	4.86e-08	1.07e-07	2.27e-05	1.39e-05	6.51e-08	5.15e-07
Burkholderia sp. PAMC 26561	1.03e-05	2.52e-05	4.29e-07	1.55e-06	1.89e-07	3.4e-06	1.33e-06	3.14e-06	2.95e-06	3.89e-07	4.28e-07	6.54e-05	1.88e-06	1.63e-06	2.96e-06
Burkholderia sp. PAMC 28687	1.03e-05	1.83e-05	6.13e-08	1.66e-06	1.89e-07	1.23e-06	1.75e-07	6.27e-07	9.3e-07	4.86e-08	5.35e-07	5.74e-05	3.57e-06	0	4.83e-06
Burkholderia sp. THE68	3.57e-06	2.52e-05	0	6.65e-07	0	8.23e-07	1.05e-07	1.57e-07	1.55e-07	2.29e-06	6.42e-07	5.08e-05	3.75e-06	1.95e-07	1.74e-06
Burkholderia stabilis	1.39e-05	4e-05	3.61e-06	8.86e-07	0	7.2e-07	1.61e-06	3.14e-07	4.65e-07	1.46e-07	5.35e-07	0.000118865	3.12e-05	6.51e-08	5.79e-06
Burkholderia stagnalis	3.17e-06	1.13e-05	4.29e-07	6.65e-07	1.26e-07	1.23e-06	1.05e-07	3.14e-07	0	1.46e-05	2.14e-07	5.74e-05	6.42e-06	0	2.77e-06
Burkholderia territorii	7.54e-06	3.48e-05	6.13e-08	2.22e-06	0	4.73e-06	3.5e-08	1.57e-07	1.55e-07	9.73e-08	3.21e-07	7.35e-05	1.57e-06	0	4.31e-06
Burkholderia thailandensis	4.36e-06	2.52e-05	4.9e-07	1.55e-06	1.26e-07	7.2e-07	1.05e-07	1.25e-06	7.75e-07	8.42e-06	6.42e-07	0.000154925	7.93e-06	9.24e-06	4.63e-06
Burkholderia ubonensis	4.88e-05	8.18e-05	1.68e-05	5.98e-06	2.08e-06	5.25e-06	6.12e-06	2.2e-06	1.71e-06	6.32e-07	2.46e-06	0.000337897	3.52e-05	3.77e-06	8.49e-06
Burkholderia vietnamiensis	1.15e-05	1.48e-05	7.35e-07	1.11e-06	1.26e-07	2.26e-06	2.1e-07	3.14e-07	1.09e-06	1.46e-07	1.18e-06	8.68e-05	3.09e-06	4.55e-07	1.67e-06
Buttiauxella agrestis	3.21e-05	1.74e-05	1.23e-07	0.000837326	1.7e-06	0.000800521	9.9e-06	0.000267624	0.000368749	0.00756548	0.00757313	0.000154925	2.73e-05	0.000161688	3.99e-06
Buttiauxella ferragutiae	3.17e-06	1.74e-06	1.23e-07	9.77e-05	1.89e-07	7.22e-05	6.44e-06	3.07e-05	4.43e-05	0.000646347	0.000677802	3.87e-05	1.73e-05	7.03e-05	6.43e-07
Buttiauxella sp. 3AFRM03	2.54e-05	0	6.74e-07	8.24e-05	0	6.99e-05	5.21e-06	4.09e-05	4.11e-05	0.000662546	0.000628677	2.8e-05	6.9e-06	6.57e-05	9.01e-07
Buttiauxella sp. R73	4.17e-05	6.96e-06	6.74e-07	0.000199194	4.09e-06	0.000186881	2.27e-06	0.000473597	9.74e-05	0.00122819	0.00132992	6.68e-05	9.2e-06	0.000137093	8.36e-07
Buttiauxella sp. WJP83	2.66e-05	3.48e-06	6.13e-08	0.000144466	0	0.000156935	2.66e-06	0.00131537	6.65e-05	0.00113338	0.00119432	3.21e-05	1.91e-05	8.27e-05	3.86e-07
Butyricimonas virosa	2.02e-05	8.71e-06	0	2.22e-07	0	1.03e-06	0	0	1.55e-07	0	0	4.41e-05	6.05e-08	0	1.16e-06
Butyrivibrio crossotus	7.94e-07	2.61e-06	0	0	0	2.06e-07	0	0	0	0	0	1.6e-05	0	0	2.03e-05
Bythopirellula goksoeyrii	5.55e-06	1.31e-05	0	3.21e-06	0	5.15e-07	1.4e-07	1.57e-07	0	0	4.28e-07	0.000121536	3.63e-07	0	2.57e-07
Caballeronia grimmiae	2.06e-05	3.22e-05	0	1.33e-06	1.89e-07	3.91e-06	2.1e-07	2.2e-06	4.65e-07	2.92e-07	2.03e-06	0.000136227	1.15e-06	3.58e-06	8.36e-06
Caballeronia insecticola	1.75e-05	8.36e-05	3.06e-07	4.54e-06	1.26e-07	1.96e-06	4.2e-07	1.1e-06	4.19e-06	1.07e-06	6.42e-07	0.000164274	8.48e-06	9.11e-07	2.64e-06
Caballeronia sp. Lep1P3	1.43e-05	9.32e-05	6.13e-08	1.77e-06	6.29e-08	3.09e-06	2.8e-07	7.84e-07	1.55e-07	1.95e-07	0	0.000162938	8.29e-06	1.95e-07	3.67e-06
Caballeronia sp. M1242	5.55e-06	2.44e-05	0	8.86e-07	0	2.47e-06	3.5e-08	9.41e-07	1.55e-07	4.86e-08	5.35e-07	6.01e-05	2.48e-06	6.51e-08	1.48e-06
Caballeronia sp. NK8	5.55e-06	1.48e-05	1.23e-07	1.66e-06	0	1.13e-06	2.45e-07	1.41e-06	1.5e-05	4.38e-07	1.39e-06	6.94e-05	6.05e-07	0	9.01e-07
Caballeronia sp. SL2Y3	7.94e-06	2.61e-05	1.23e-06	9.97e-07	0	9.26e-07	6.3e-07	3.14e-07	1.55e-07	0	6.42e-07	6.68e-05	4.48e-06	3.25e-07	1.87e-06
Caballeronia sp. Sq4a	2.38e-06	1.57e-05	6.13e-07	7.76e-07	0	1.13e-06	1.75e-07	1.57e-07	9.3e-07	9.73e-08	0	4.27e-05	1.09e-06	5.86e-07	1.29e-06
Caballeronia sp. TF1N1	1.19e-05	9.14e-05	1.45e-05	2.1e-06	6.29e-08	2.57e-06	4.2e-07	4.71e-07	1.09e-06	7.3e-07	1.5e-06	0.00016561	9.93e-06	2.21e-06	4.38e-06
Caballeronia zhejiangensis	1.39e-05	3.74e-05	6.74e-07	4.21e-06	0	2.78e-06	1.05e-06	3.45e-06	0	0	5.35e-07	0.000154925	1.97e-05	4.55e-07	2.51e-06
Caenibius sp. WL	4.8e-05	8.27e-05	6.74e-07	6.54e-06	0	3.5e-06	7e-08	4.71e-07	2.02e-06	1.46e-07	2.14e-07	0.000104174	9.08e-07	5.21e-07	3.8e-06
Caenibius tardaugens	3.45e-05	6.7e-05	6.13e-08	9.97e-07	0	2.98e-06	2.1e-07	2.98e-06	1.55e-07	9.73e-08	7.49e-07	8.68e-05	1.21e-06	9.11e-07	3.92e-06
Caldanaerobacter subterraneus	7.94e-05	1.04e-05	0	5.54e-07	0	0	0	0	0	0	0	2.4e-05	9.69e-07	1.95e-07	2.57e-07
Caldibacillus thermoamylovorans	1.19e-06	2.61e-06	8.7e-06	2.22e-07	0	1.03e-07	0	9.41e-07	1.55e-07	0	0	2.27e-05	0	0	8.36e-07
Caldichromatium japonicum	7.94e-06	8.71e-06	9.8e-07	1.11e-07	0	6.17e-07	0	1.57e-07	6.2e-07	1.46e-07	7.49e-07	9.48e-05	9.69e-07	1.28e-05	1.87e-06
Caldilinea aerophila	5.16e-06	1.65e-05	6.13e-08	2.22e-07	0	2.57e-06	6.65e-07	6.27e-07	6.2e-07	1.07e-06	8.56e-07	0.000185643	1.21e-06	3.9e-07	5.79e-07
Caldimonas brevitalea	9.64e-05	0.000223743	1.84e-07	7.76e-06	1.93e-05	1.33e-05	3.15e-07	9.41e-07	1.55e-07	2.43e-07	1.07e-06	0.000442071	3.61e-05	8.85e-06	6.97e-05
Caldimonas thermodepolymerans	0.000105146	0.000296003	6.13e-08	6.98e-06	0	9.98e-06	1.4e-07	7.84e-07	4.65e-07	3.41e-07	3.42e-06	0.000534224	2.77e-05	3.71e-06	7.91e-05
Caldinitratiruptor microaerophilus	5.16e-06	1.65e-05	0	1.11e-07	0	6.17e-07	0	0	0	0	0	0.00023773	8.48e-07	4.55e-07	8.36e-07
Caldithrix abyssi	3.17e-06	9.58e-06	0	0	0	3.09e-07	0	0	0	0	0	7.21e-05	4.9e-06	6.51e-08	1.29e-07
Calothrix brevissima	4.36e-06	6.09e-06	0	1.11e-07	0	5.15e-07	3.5e-08	3.14e-07	1.4e-06	4.86e-08	0	4.14e-05	9.02e-06	6.51e-08	2.77e-06
Calothrix parasitica	7.1e-05	9.32e-05	1.23e-07	1.11e-07	0	1.34e-06	6.3e-07	0	0	0	2.14e-07	5.08e-05	4.36e-06	0	1.29e-05
Calothrix sp. 336/3	2.38e-06	7.84e-06	0	2.22e-07	0	2.06e-07	1.4e-07	0	1.55e-07	0	8.56e-07	2.54e-05	5.69e-06	2.21e-06	1.93e-07
Calothrix sp. NIES-2098	1.98e-06	4.18e-05	0	1.11e-07	0	4.12e-06	2.1e-07	0	0	4.86e-08	1.07e-07	2.67e-05	5.39e-06	6.51e-08	3.86e-07
Calothrix sp. NIES-2100	7.14e-06	9.58e-06	0	0	4.41e-07	2.06e-07	0	0	0	0	0	3.21e-05	1.04e-05	2.6e-07	3.22e-07
Calothrix sp. NIES-3974	2.78e-06	3.31e-05	0	9.97e-07	0	1.03e-07	2.1e-07	0	1.4e-06	4.86e-08	1.07e-07	3.61e-05	3.27e-06	2.93e-06	6.43e-08
Calothrix sp. PCC 6303	8.73e-06	4.35e-06	0	2.22e-07	0	1.44e-06	1.05e-07	9.41e-07	1.55e-07	2.43e-06	1.07e-06	2.14e-05	5.99e-06	8.46e-07	3.22e-07
Calothrix sp. PCC 7507	6.35e-06	4e-05	0	0	0	4.12e-07	2.45e-07	2.98e-06	0	0	0	3.74e-05	1.23e-05	0	2.57e-07
Calycomorphotria hydatis	3.57e-06	5.22e-06	0	2.22e-07	0	3.09e-07	0	0	0	0	0	9.62e-05	3.63e-07	5.21e-07	1.29e-07
Campylobacter concisus	4.36e-06	2.26e-05	0	1.11e-07	0	5.15e-07	3.5e-08	4.71e-07	4.65e-07	6.32e-07	0	5.48e-05	1.82e-07	4.55e-07	5.15e-07
Campylobacter curvus	3.97e-07	0	0	0	0	5.15e-07	0	3.14e-07	0	1.95e-07	0	4.01e-05	1.82e-07	3.25e-07	1.13e-05
Campylobacter fetus	4.76e-06	3.48e-06	0	1.11e-07	0	0	2.1e-07	0	0	0	0	2.8e-05	6.05e-08	6.51e-08	3.8e-06
Campylobacter geochelonis	3.97e-07	3.48e-06	4.34e-05	0	0	0	0	0	0	0	0	9.35e-06	0	4.29e-06	0
Campylobacter iguaniorum	7.94e-07	1.57e-05	3.74e-06	0	0	5.15e-07	0	0	0	0	0	1.74e-05	6.05e-08	0	0
Campylobacter sp. RM10537	1.98e-06	0.000142778	0	0	0	0	0	0	0	0	0	9.35e-06	6.05e-08	1.3e-07	6.43e-08
Campylobacter sp. RM12651	1.98e-06	8.18e-05	0	0	0	2.06e-07	0	0	0	0	0	1.2e-05	6.05e-08	0	1.29e-07
Campylobacter sp. RM5004	3.17e-06	3.48e-06	1.05e-05	2.22e-07	0	2.06e-07	0	0	1.09e-06	0	0	8.01e-06	1.21e-07	6.51e-08	1.29e-07
Campylobacter sp. RM8964	3.97e-07	8.71e-07	4.12e-05	0	0	3.09e-07	0	0	0	0	0	4.01e-06	6.05e-08	0	0
Campylobacter sputorum	1.98e-06	1.13e-05	1.42e-05	3.32e-07	6.29e-08	3.09e-07	0	0	0	0	0	2.14e-05	1.82e-07	0	5.15e-07
Campylobacter upsaliensis	0	1.74e-06	0	0	3.84e-06	0	0	0	0	3.41e-07	0	5.34e-06	6.05e-07	9.76e-07	1.22e-06
Candidatus Amoebophilus asiaticus	2.78e-06	2.35e-05	3.19e-06	1.11e-07	0	1.03e-07	0	0	0	0	4.5e-06	1.2e-05	3.03e-07	0	6.43e-08
Candidatus Aquiluna sp. UB-MaderosW2red	0.000112288	0.000486663	0	1.33e-06	0	5.61e-05	0	0	0	0	0	1.34e-05	4.48e-06	0	6.43e-08
Candidatus Arcticimaribacter forsetii	6.71e-05	9.32e-05	0	2.22e-07	0	1.23e-06	1.4e-07	4.71e-07	7.75e-06	0	2.14e-07	2.27e-05	6.05e-07	9.11e-07	8.36e-07
Candidatus Arsenophonus lipoptenae	1.98e-06	8.44e-05	0	4.43e-07	0	7.2e-07	0	4.71e-07	1.69e-05	0	0	9.35e-06	5.45e-07	6.51e-08	1.03e-06
Candidatus Atelocyanobacterium thalassa	0.000155934	0.000251602	0	1.11e-06	0	2.06e-07	0	0	3.1e-07	0	0	3.47e-05	4.06e-06	1.95e-07	1.29e-07
Candidatus Azobacteroides pseudotrichonymphae	5.55e-06	4.35e-06	9.56e-06	2.22e-07	0	1.03e-07	0	0	3.1e-07	0	1.07e-07	1.74e-05	1.21e-07	0	6.43e-08
Candidatus Babela massiliensis	7.94e-06	1.57e-05	0	0	0	5.15e-07	0	0	0	0	0	0.000197663	1.82e-07	0	1.93e-07
Candidatus Bandiella numerosa	9.52e-06	0.000127107	0	1.11e-07	0	0	0	0	0	0	0	0.000263106	2.43e-05	1.63e-06	0
Candidatus Baumannia cicadellinicola	9.52e-06	7.84e-06	1.84e-07	4.43e-07	1.51e-06	8.23e-07	3.5e-08	2.2e-06	7.91e-06	9.73e-08	2.14e-07	4.27e-05	6.96e-06	1.4e-05	5.79e-07
Candidatus Chazhemtobacterium aquaticus	7.94e-06	3.48e-06	0	1.11e-07	0	3.09e-07	3.5e-08	0	0	0	0	0.000192321	0	0	1.93e-07
Candidatus Chromulinivorax destructor	1.15e-05	6.09e-06	0	0	0	2.06e-07	0	1.1e-06	0	0	0	0.000702505	3.03e-07	6.51e-08	4.5e-07
Candidatus Cloacimonas acidaminovorans	3.97e-06	3.48e-06	0	3.32e-07	0	3.09e-07	0	0	0	0	1.07e-07	0.000101503	3.63e-07	0	5.15e-07
Candidatus Contubernalis alkalaceticum	7.14e-06	0.000170637	0	1.11e-07	0	2.06e-07	0	0	0	3.41e-07	4.28e-07	4.01e-05	1.82e-07	1.11e-06	6.43e-08
Candidatus Coxiella mudrowiae	7.94e-06	2.26e-05	3.06e-06	2.22e-07	0	1.03e-07	0	0	0	0	0	9.88e-05	6.05e-08	6.51e-08	0
Candidatus Desulforudis audaxviator	7.94e-07	3.48e-06	0	5.54e-07	0	8.23e-07	0	3.14e-07	0	4.86e-08	0	9.08e-05	7.87e-07	0	8.62e-06
Candidatus Doolittlea endobia	4.36e-06	3.48e-06	1.23e-07	5.98e-06	0	3.4e-06	0	1.1e-06	2.79e-06	4.86e-08	1.5e-06	2e-05	3.33e-06	2.33e-05	1.93e-07
Candidatus Endolissoclinum faulkneri	7.94e-07	6.01e-05	0	0	0	4.12e-07	0	0	0	0	1.07e-07	3.74e-05	3.03e-07	6.38e-06	3.86e-07
Candidatus Endoriftia persephone	5.55e-06	1.22e-05	0	3.32e-07	6.29e-08	2.57e-06	1.29e-06	0	3.1e-07	1.95e-07	4.92e-06	0.000128214	6.05e-07	2.47e-06	7.72e-07
Candidatus Enterovibrio luxaltus	1.19e-06	1.31e-05	5.51e-07	8.2e-06	0	3.09e-07	0	1.25e-06	9.92e-06	1.46e-07	1.39e-06	1.34e-05	0	4.29e-06	0
Candidatus Erwinia haradaeae	2.06e-05	2.52e-05	4.01e-05	6.65e-06	6.29e-08	1.27e-05	2.45e-07	6.43e-06	8.25e-05	7.3e-07	1.18e-06	0.000128214	7.14e-06	1.94e-05	1.03e-06
Candidatus Filomicrobium marinum	1.11e-05	0.000188049	6.13e-08	0	0	3.09e-07	1.4e-07	2.51e-06	1.55e-07	1.99e-06	2.14e-07	0.00024975	1.09e-06	0	1.16e-06
Candidatus Formimonas warabiya	2.78e-06	1.48e-05	0	1.11e-07	5.04e-07	2.06e-07	7e-08	0	3.1e-07	0	1.07e-07	7.08e-05	3.03e-07	3.9e-07	7.08e-07
Candidatus Fukatsuia symbiotica	7.54e-06	6.09e-06	6.13e-08	7.31e-06	4.41e-07	8.64e-06	1.4e-07	1.07e-05	4.95e-05	5.59e-06	6.53e-06	4.41e-05	1.22e-05	4.54e-05	5.15e-07
Candidatus Gullanella endobia	3.57e-06	1.74e-06	0	1.11e-07	8.81e-07	1.03e-06	3.5e-08	9.41e-07	5.58e-06	9.73e-07	9.63e-07	9.35e-06	2.42e-07	1.56e-06	6.43e-08
Candidatus Hamiltonella defensa	7.54e-06	2.61e-06	5.77e-05	1.88e-06	4.41e-07	6.38e-06	2.1e-07	4.08e-06	2.9e-05	2.43e-07	4.28e-06	6.01e-05	3.63e-06	1.63e-05	1.93e-07
Candidatus Hoaglandella endobia	1.59e-06	6.96e-06	1.84e-07	4.43e-07	3.15e-07	1.85e-06	6.65e-07	4.08e-06	1.52e-05	1.46e-07	4.71e-06	2.8e-05	1.82e-07	6.51e-07	2.57e-07
Candidatus Hodgkinia cicadicola	3.97e-06	1.04e-05	1.23e-07	1.11e-07	0	0	3.5e-08	0	1.55e-07	0	0	0.000110852	3.03e-07	0	6.43e-08
Candidatus Ichthyocystis hellenicum	4.36e-06	9.66e-05	1.52e-05	1.11e-07	0	0	0	1.57e-07	0	0	0	2.67e-05	1.82e-07	0	3.22e-07
Candidatus Ishikawaella capsulata	3.97e-07	2.61e-06	3.25e-06	3.32e-07	3.78e-07	2.06e-07	7e-08	0	3.1e-07	5.84e-07	0	1.87e-05	6.05e-08	2.02e-06	6.43e-08
Candidatus Kaistella beijingensis	1.19e-05	8.71e-05	2.73e-05	1.22e-06	0	6.17e-07	3.5e-08	1.57e-07	0	0	1.07e-07	3.34e-05	3.63e-07	1.3e-07	2.32e-06
Candidatus Kinetoplastibacterium desouzaii	5.16e-06	0.000139295	0	1.11e-07	0	1.03e-07	0	0	9.3e-07	0	0	1.2e-05	4.24e-07	1.3e-07	0
Candidatus Koribacter versatilis	4.76e-06	2.87e-05	6.13e-08	6.65e-07	0	1.03e-06	2.45e-07	0	0	1.46e-07	4.28e-07	0.000602338	7.69e-06	6.51e-08	4.5e-07
Candidatus Methylopumilus planktonicus	3.97e-06	3.13e-05	0	2.1e-06	6.29e-08	1.54e-06	8.05e-07	1.57e-07	7.75e-07	0	0	3.74e-05	1.57e-06	1.43e-06	7.72e-07
Candidatus Methylopumilus rimovensis	4.36e-06	2.26e-05	0	1.11e-07	0	3.6e-06	0	0	1.55e-07	0	0	4.01e-05	4.84e-07	3.25e-07	9.65e-07
Candidatus Methylopumilus turicensis	7.66e-05	0.000340403	0	2.14e-05	6.29e-08	6.87e-05	7.35e-07	4.71e-07	1.55e-07	4.86e-08	1.23e-05	6.14e-05	6.56e-05	4.42e-06	2.12e-06
Candidatus Methylopumilus universalis	9.92e-06	4e-05	0	1.66e-06	0	3.29e-06	3.5e-08	0	1.55e-07	0	3.21e-07	5.74e-05	6.66e-07	8.52e-06	6.43e-07
Candidatus Methylospira mobilis	1.11e-05	3.05e-05	2.02e-05	2.44e-06	0	2.98e-06	3.5e-08	1.62e-05	3.1e-07	4.86e-07	8.56e-07	0.00016561	2.97e-06	1.95e-07	1.87e-06
Candidatus Midichloria mitochondrii	7.94e-07	5.22e-05	0	0	0	0	0	0	0	4.86e-08	0	4.01e-05	3.63e-07	6.51e-08	1.29e-07
Candidatus Moranella endobia	0	2.61e-06	6.13e-08	1.22e-06	6.29e-08	7.2e-07	0	0	4.65e-07	0	9.63e-07	1.07e-05	2.85e-06	2.33e-05	1.29e-07
Candidatus Mycobacterium methanotrophicum	9.13e-06	2.87e-05	6.13e-08	5.54e-07	0	1.03e-07	2.8e-07	1.57e-07	1.55e-07	9.73e-08	4.28e-07	7.21e-05	4.24e-07	6.51e-08	9.01e-07
Candidatus Mycobacterium wuenschmannii	8.33e-06	6.62e-05	6.13e-08	7.76e-07	0	2.06e-07	1.05e-07	0	0	1.95e-07	2.14e-07	5.74e-05	5.45e-07	6.51e-08	7.08e-07
Candidatus Mycosynbacter amalyticus	1.35e-05	2.96e-05	6.13e-08	2.22e-07	0	9.26e-07	0	0	0	0	1.07e-07	0.000145576	2.42e-07	0	4.5e-06
Candidatus Nanosynbacter sp. HMT-352	8.73e-06	6.09e-06	0	0	0	7.2e-07	0	0	0	0	0	6.81e-05	1.21e-07	0	7.08e-07
Candidatus Nesciobacter abundans	1.19e-06	8.71e-07	5.61e-05	0	0	2.06e-07	0	0	0	0	0	2e-05	1.82e-07	0	0
Candidatus Nitrosoglobus terrae	3.97e-07	5.22e-06	4.59e-05	2.22e-07	0	1.23e-06	0	0	1.55e-06	0	0	4.27e-05	2.42e-07	0	0
Candidatus Nitrospira inopinata	5.55e-06	5.48e-05	0	2.22e-07	0	0	5.6e-07	1.57e-07	0	0	3.21e-07	0.000146912	1.21e-07	0	3.22e-07
Candidatus Nitrotoga arctica	7.14e-06	2.44e-05	0	9.97e-07	0	1.23e-06	2.1e-07	6.27e-07	6.51e-06	0	1.39e-06	0.000105509	5.45e-07	6.7e-06	4.5e-06
Candidatus Nitrotoga sp. AM1P	5.95e-06	9.58e-06	0	2.1e-06	8.81e-07	1.54e-06	1.4e-07	0	1.55e-07	1.46e-07	4.28e-07	9.08e-05	7.26e-07	8.59e-06	4.89e-06
Candidatus Nucleicultrix amoebiphila	1.59e-06	6.09e-06	3.68e-05	1.11e-07	1.64e-06	5.15e-07	0	0	0	0	0	6.01e-05	3.63e-07	3.9e-07	5.79e-07
Candidatus Ornithobacterium hominis	1.31e-05	0.000108825	0	5.54e-07	0	4.12e-07	1.4e-07	0	2.48e-06	0	0	3.07e-05	1.82e-07	7.81e-07	1.93e-07
Candidatus Pantoea carbekii	1.59e-06	5.22e-05	6.13e-08	4.43e-07	2.52e-07	3.6e-06	0	7.84e-07	1.83e-05	0	4.28e-07	1.74e-05	1.82e-07	9.11e-07	5.15e-07
Candidatus Pelagibacter sp. IMCC9063	3.57e-06	0.000154096	6.13e-08	0	6.29e-08	1.03e-07	4.9e-07	3.14e-07	6.2e-07	9.73e-08	0	2.27e-05	4.24e-07	6.51e-08	1.29e-07
Candidatus Pelagibacter sp. RS39	2.38e-06	7.84e-06	3.31e-05	3.32e-07	0	2.06e-07	0	0	0	9.73e-08	0	1.6e-05	1.82e-07	0	6.43e-08
Candidatus Pelagisphaera phototrophica	5.16e-06	1.48e-05	0	5.54e-07	0	9.26e-07	0	0	0	0	0	8.01e-05	6.66e-07	0	0
Candidatus Phaeomarinobacter ectocarpi	7.54e-06	0.000109695	0	0	0	1.03e-06	1.4e-07	7.84e-06	1.55e-07	9.73e-08	1.07e-07	0.000142905	1.88e-06	0	8.36e-07
Candidatus Phycorickettsia trachydisci	2.54e-05	0.000183696	6.13e-08	3.32e-07	1.89e-07	2.06e-07	3.5e-08	3.14e-07	0	0	0	3.87e-05	5.45e-07	6.51e-08	6.43e-08
Candidatus Planktophila dulcis	2.06e-05	0.000247249	0	1.1e-05	0	5.39e-05	0	7.84e-07	0	0	0	2.67e-05	6.11e-06	5.21e-07	0
Candidatus Planktophila lacus	2.82e-05	0.000298615	0	8.2e-06	0	4.11e-05	1.05e-07	1.25e-06	0	0	0	2.27e-05	3.81e-06	1.37e-06	0
Candidatus Planktophila limnetica	4.76e-06	0.000100989	0	2.66e-06	0	1.16e-05	0	0	0	4.86e-08	0	2.4e-05	1.27e-06	1.3e-07	3.22e-07
Candidatus Planktophila sulfonica	1.83e-05	0.000258567	0	1.17e-05	0	5.78e-05	0	0	0	0	0	1.34e-05	5.99e-06	1.56e-06	0
Candidatus Planktophila vernalis	8.73e-06	0.00011666	0	9.75e-06	0	1.45e-05	3.5e-08	1.57e-07	0	3.41e-07	0	1.74e-05	2.18e-06	2.6e-07	0
Candidatus Planktophila versatilis	8.73e-06	0.000195014	0	8.86e-06	0	3.54e-05	2.1e-07	0	0	0	5.35e-07	2.8e-05	4e-06	6.51e-07	1.93e-07
Candidatus Portiera aleyrodidarum	3.57e-06	1.65e-05	4.53e-06	3.32e-07	5.67e-07	3.09e-07	1.4e-07	7.84e-07	1.55e-07	1.46e-07	2.14e-07	2.94e-05	4.24e-07	3.9e-07	1.22e-05
Candidatus Profftia sp. (ex Adelges kitamiensis)	1.98e-06	0	5.81e-05	1.66e-06	6.29e-07	1.23e-06	6.65e-07	3.61e-06	1.8e-05	2.92e-07	1.28e-06	1.2e-05	3.81e-06	1.13e-05	6.43e-08
Candidatus Profftia tarda	7.94e-07	5.22e-06	1.21e-05	1.22e-06	2.52e-07	1.34e-06	3.5e-08	1.73e-06	1.41e-05	4.86e-08	1.5e-06	2.14e-05	2.54e-06	3.71e-06	0
Candidatus Promineofilum breve	1.43e-05	4.09e-05	5.51e-07	1.99e-06	0	5.15e-07	1.05e-07	0	0	2.92e-07	3.21e-07	0.000376628	3.81e-06	1.3e-07	9.01e-07
Candidatus Protochlamydia naegleriophila	8.33e-06	3.48e-06	0	1.11e-07	0	1.13e-06	3.5e-08	0	0	0	0	0.0001202	3.63e-07	0	5.15e-07
Candidatus Protofrankia datiscae	6.75e-06	3.4e-05	0	4.43e-07	0	2.06e-07	3.5e-08	0	0	0	3.21e-07	9.75e-05	7.26e-07	0	1.22e-06
Candidatus Pseudomonas adelgestsugas	9.52e-06	3.48e-06	0.000116026	1.79e-05	1.49e-05	3.57e-05	1.49e-05	4.24e-06	8.22e-06	2.03e-05	1.05e-05	1.2e-05	6.05e-08	2.47e-06	2.73e-05
Candidatus Pseudothioglobus singularis	1.59e-06	3.48e-06	5.51e-06	0	0	2.06e-07	0	0	1.55e-07	0	0	1.74e-05	1.57e-06	3.9e-07	2.57e-07
Candidatus Puniceispirillum marinum	5.16e-06	1.65e-05	3.68e-07	2.22e-07	0	6.17e-07	2.8e-07	1.57e-07	0	4.86e-08	2.14e-07	5.88e-05	6.05e-08	2.93e-06	1.29e-07
Candidatus Reidiella endopervernicosa	3.17e-06	6.96e-06	4.04e-06	8.86e-07	6.29e-08	2.78e-06	7e-08	3.14e-07	4.65e-07	4.86e-08	1.07e-06	8.01e-05	2.54e-06	3.12e-06	1.03e-06
Candidatus Rhabdochlamydia oedothoracis	0.000163076	6.09e-06	0	4.43e-07	0	1.54e-06	0	0	0	0	0	0.000100167	1.21e-07	0	5.79e-07
Candidatus Rhabdochlamydia porcellionis	0.000111098	2.61e-06	0	4.43e-06	0	5.42e-05	0	0	0	1.95e-07	0	0.000232388	5.45e-07	0	3.38e-05
Candidatus Rhodoluna planktonica	0.000795541	0.00209988	0	4.54e-06	0	0.000248111	0	0	2.95e-06	4.86e-08	0	4.67e-05	1.91e-05	5.21e-07	6.43e-08
Candidatus Rickettsiella viridis	1.19e-05	2.61e-06	8.58e-06	2.22e-07	6.29e-08	1.85e-06	0	1.57e-07	9.61e-06	0	0	8.68e-05	1.82e-07	0	7.08e-07
Candidatus Ruthturnera calyptogenae	1.59e-06	5.22e-06	0	4.43e-07	2.9e-06	2.06e-07	0	4.71e-07	1.69e-05	0	0	8.01e-06	2.42e-07	0	0
Candidatus Saccharimonas aalborgensis	1.35e-05	2.7e-05	0	4.43e-07	0	1.13e-06	0	0	0	0	0	0.000144241	1.82e-07	0	4.63e-06
Candidatus Sneabacter namystus	1.19e-06	0.000150613	0	1.11e-07	0	1.03e-07	0	0	0	0	0	2.54e-05	0	0	0
Candidatus Sodalis pierantonius	1.11e-05	8.71e-07	1.23e-07	4.54e-06	8.18e-07	6.79e-06	1.75e-07	2.51e-06	9.3e-07	5.35e-07	6.1e-06	2.14e-05	6.96e-06	5.13e-05	6.43e-07
Candidatus Steffania adelgidicola	1.19e-06	8.71e-07	0	9.97e-07	0	1.03e-06	0	4.71e-07	5.27e-06	4.86e-07	6.42e-07	1.2e-05	3.03e-07	1.85e-05	0
Candidatus Sulfidibacterium hydrothermale	1.39e-05	7.84e-06	0	6.65e-07	0	4.12e-07	0	4.71e-07	0	0	0	0.000185643	2.42e-07	0	6.43e-07
Candidatus Sulfuricurvum sp. RIFRC-1	6.39e-05	8.1e-05	2.35e-05	0	2.01e-06	3.19e-06	0	1.57e-07	0	1.46e-06	0	0.000229717	3.03e-07	1.3e-07	1.29e-07
Candidatus Sulfurimonas marisnigri	2.94e-05	0	0	0	0	7.2e-07	0	0	1.55e-07	0	0	1.34e-05	1.21e-07	3.84e-06	1.29e-07
Candidatus Symbiobacter mobilis	4.6e-05	0.00020372	1.15e-05	1.22e-06	0	5.35e-06	3.5e-08	0	3.1e-07	1.95e-07	6.42e-07	0.000173623	2.12e-06	2.6e-06	7.08e-06
Candidatus Tachikawaea gelatinosa	0	7.84e-06	6.13e-08	0	0	4.12e-07	1.4e-07	1.57e-07	7.75e-07	1.56e-06	1.93e-06	2.8e-05	1.21e-07	1.3e-07	6.43e-08
Candidatus Thiodictyon syntrophicum	2.02e-05	0.000225484	0	9.42e-06	4.66e-06	8.54e-06	1.4e-07	7.84e-07	1.4e-06	1.26e-06	4.28e-07	0.000416695	8.23e-06	1.37e-06	2.77e-06
Candidatus Thioglobus autotrophicus	2.38e-06	5.22e-06	0	2.22e-07	0	1.54e-06	4.9e-07	1.57e-07	2.02e-06	0	1.07e-07	3.07e-05	3.03e-07	1.95e-06	6.43e-08
Candidatus Thioglobus sp. NP1	6.94e-05	4.27e-05	0	0	0	3.09e-07	0	3.14e-07	9.3e-07	0	0	2.27e-05	4.24e-07	0	1.93e-07
Candidatus Thiothrix anitrata	5.95e-06	7.84e-06	1.23e-07	8.86e-07	0	1.96e-06	7.35e-07	3.14e-07	4.65e-07	5.69e-06	0	2.8e-05	3.03e-07	6.51e-07	1.61e-06
Candidatus Velamenicoccus archaeovorus	6.35e-06	5.22e-06	6.13e-08	4.1e-06	0	2.06e-07	0	0	0	0	0	0.000635727	2.42e-07	0	2.19e-06
Candidatus Viadribacter manganicus	1.83e-05	0.000139295	6.13e-08	9.97e-07	0	1.65e-06	8.05e-07	0	0	4.86e-08	3.75e-06	0.00036995	2.54e-06	0	2.32e-06
Candidatus Westeberhardia cardiocondylae	7.94e-07	3.22e-05	3.37e-06	5.54e-07	6.29e-08	3.09e-07	3.5e-08	0	0	4.86e-08	2.14e-07	1.34e-05	6.05e-08	0	1.29e-07
Capillimicrobium parvum	2.54e-05	0.000133201	2.45e-07	1.99e-06	0	3.09e-07	2.1e-07	0	0	4.86e-08	0	0.000482138	3.87e-06	6.51e-07	5.28e-06
Capnocytophaga canimorsus	5.63e-05	0.00021852	3.06e-07	1.11e-07	0	7.2e-07	1.05e-07	0	1.86e-06	9.73e-08	1.07e-07	4.54e-05	1.82e-06	4.42e-06	8.36e-07
Capnocytophaga cynodegmi	1.79e-05	0.000247249	1.23e-07	1.11e-07	0	1.34e-06	0	3.14e-07	4.5e-06	0	2.14e-07	1.74e-05	3.63e-07	2.6e-07	1.93e-07
Capnocytophaga endodontalis	1.59e-05	0.000122754	0	0	6.29e-08	7.2e-07	0	3.14e-07	1.24e-06	0	0	1.87e-05	4.24e-07	1.3e-07	1.29e-07
Capnocytophaga gingivalis	6.35e-06	1.65e-05	0	3.66e-06	0	4.12e-07	1.75e-07	0	0	0	5.35e-07	3.47e-05	2.42e-07	5.21e-07	3.22e-07
Capnocytophaga haemolytica	2.9e-05	8.71e-06	1.84e-07	7.76e-07	0	4.12e-07	0	0	0	0	0	1.07e-05	4.84e-07	0	6.43e-08
Capnocytophaga sp. oral taxon 878	8.33e-06	0.000134942	3.12e-05	0	0	8.23e-07	1.75e-07	1.57e-07	1.02e-05	0	0	2.14e-05	3.63e-07	1.5e-06	5.79e-07
Capnocytophaga sputigena	2.42e-05	2.96e-05	0	8.86e-07	0	9.26e-07	1.75e-07	6.43e-06	9.3e-07	0	1.07e-07	2.27e-05	6.66e-07	1.04e-06	1.93e-07
Capnocytophaga stomatis	4.17e-05	0.000105342	1.23e-07	1.11e-07	0	1.23e-06	7e-08	3.14e-07	3.88e-06	0	1.07e-07	2e-05	4.24e-07	1.11e-05	7.08e-07
Caproicibacter fermentans	1.59e-06	6.09e-06	0	1.11e-07	0	1.03e-06	1.4e-07	0	0	0	0	4.81e-05	1.21e-07	1.02e-05	6.43e-07
Capsulimonas corticalis	1.39e-05	2.44e-05	0	2.22e-07	0	1.03e-06	2.1e-07	1.57e-07	3.1e-07	3.41e-07	7.49e-07	0.00026177	4.18e-06	1.17e-06	1.09e-06
Cardinium endosymbiont of Encarsia pergandiella	4.4e-05	1.39e-05	0	4.43e-07	0	3.09e-07	0	0	0	0	1.07e-07	6.68e-06	1.21e-07	0	4.5e-07
Cardinium endosymbiont of Sogatella furcifera	1.19e-06	6.96e-06	0	2.22e-07	0	0	0	0	4.65e-07	0	0	6.68e-06	6.05e-08	4.62e-06	1.56e-05
Cardiobacterium hominis	4.36e-06	2.52e-05	0	4.43e-07	6.29e-08	1.13e-06	3.15e-07	0	1.71e-06	3.89e-07	3.21e-07	7.21e-05	3.57e-06	1.5e-06	1.03e-06
Cardiobacterium sp. Marseille-Q4385	1.19e-06	1.31e-05	0	3.32e-07	6.29e-08	3.09e-07	3.5e-08	1.88e-06	1.55e-07	1.46e-07	3.21e-07	6.81e-05	4.72e-06	2.28e-06	6.43e-07
Carnobacterium divergens	3.17e-06	6.09e-06	1.84e-07	1.11e-07	0	2.06e-06	1.4e-07	1.41e-06	2.02e-05	0	5.35e-07	2.27e-05	1.82e-07	0	3.8e-06
Carnobacterium inhibens	6.35e-06	2.61e-06	0	2.33e-06	0	1.23e-05	0	4.71e-07	3.1e-07	0	0	9.35e-06	2.42e-07	0	3.86e-06
Carnobacterium maltaromaticum	0.00297227	0.000105342	3.23e-05	8.86e-07	2.52e-07	0.000103834	0.000242275	5.4e-05	0.000420231	0	4.4e-05	0.00149583	1.09e-06	0	1.15e-05
Casimicrobium huifangae	3.85e-05	8.44e-05	4.29e-07	3.21e-06	0	3.6e-06	2.8e-07	4.71e-07	0	4.86e-08	3.21e-07	0.000220368	1.79e-05	7.16e-07	1.03e-05
Castellaniella defragrans	3.09e-05	0.000153225	3.61e-06	1.88e-06	0	5.56e-06	2.27e-06	9.41e-07	0	4.38e-07	1.71e-06	0.000235059	1.8e-05	2.34e-06	9.97e-06
Catalinimonas niigatensis	3.97e-06	0.000129719	0	6.65e-07	0	6.17e-07	0	0	0	1.46e-07	2.14e-07	4.01e-05	8.48e-07	0	1.16e-06
Catellatospora sp. IY07-71	1.83e-05	3.4e-05	0	1.77e-06	3.71e-06	1.13e-06	5.6e-07	7.84e-07	3.1e-07	0	7.49e-07	0.000169616	5.27e-06	5.21e-07	3.02e-06
Catenibacterium mitsuokai	7.94e-07	0	0	7.76e-07	0	2.06e-07	0	0	0	0	0	1.2e-05	6.05e-08	0	8.36e-06
Catenibacterium sp. co_0103	1.19e-06	8.71e-06	0	6.76e-06	0	1.03e-07	0	0	7.75e-07	9.73e-08	1.07e-07	6.68e-06	0	0	5.11e-05
Catenovulum sediminis	1.98e-06	2.61e-06	1.23e-07	1.88e-06	7.36e-06	3.09e-06	1.75e-07	1.73e-06	5.58e-06	9.73e-08	1.07e-07	3.74e-05	0	1.43e-06	6.43e-07
Catenovulum sp. TS8	7.14e-06	1.74e-06	1.04e-05	2.22e-07	5.54e-06	1.54e-06	2.45e-07	4.71e-07	7.75e-07	0	0	2.54e-05	2.24e-06	6.51e-07	9.01e-06
Catenulispora acidiphila	4.48e-05	5.66e-05	1.38e-05	9.97e-07	0	2.57e-06	4.69e-06	1.57e-07	0	9.73e-07	5.35e-07	0.00022571	1.45e-06	6.51e-08	3.73e-06
Caulifigura coniformis	4.76e-06	8.71e-06	0	1.22e-06	0	2.06e-07	3.5e-08	3.14e-07	0	0	0	0.000325877	2.66e-06	0	2.77e-06
Caulobacter flavus	6.63e-05	8.88e-05	1.1e-06	4.43e-06	0	5.87e-06	4.55e-07	1.41e-06	0	9.73e-07	1.07e-06	0.000304508	1.91e-05	3.06e-06	5.47e-06
Caulobacter henricii	8.09e-05	0.00011666	1.23e-07	4.54e-06	0	9.26e-07	4.9e-07	6.27e-07	0	4.86e-08	1.07e-07	0.000431386	5.15e-06	1.95e-06	9.01e-06
Caulobacter mirabilis	5.67e-05	6.96e-05	2.14e-06	8.09e-06	0	2.47e-06	1.64e-06	7.84e-07	1.55e-07	1.46e-07	1.39e-06	0.000395326	7.02e-06	5.21e-07	7.91e-06
Caulobacter rhizosphaerae	8.29e-05	0.000124495	0	4.87e-06	0	2.26e-06	3.04e-06	2.2e-06	0	4.86e-08	7.49e-07	0.000424708	1.34e-05	1.5e-06	5.66e-06
Caulobacter segnis	0.000203944	0.000400474	7.6e-06	2.1e-05	6.29e-08	4.63e-06	3.5e-06	7.84e-07	3.1e-07	1.31e-06	1.28e-06	0.00122872	3.02e-05	1.03e-05	2.07e-05
Caulobacter soli	0.000125382	0.000242026	3.68e-07	4.65e-06	6.29e-08	2.16e-06	1.05e-07	9.41e-07	1.09e-06	4.38e-07	4.28e-06	0.000528882	9.69e-06	2.99e-06	9.07e-06
Caulobacter sp. FWC26	2.38e-05	5.05e-05	6.13e-08	1.11e-06	6.29e-07	1.44e-06	7.7e-07	1.57e-07	5.27e-06	0	0	0.000188314	5.02e-06	7.81e-07	3.6e-06
Caulobacter sp. NIBR1757	8.73e-05	8.53e-05	1.04e-06	5.32e-06	0	1.85e-06	3.15e-07	1.57e-07	0	0	5.35e-07	0.000340568	1.11e-05	1.3e-07	8.24e-06
Caulobacter sp. NIBR2454	3.45e-05	0.000103601	6.13e-08	2.44e-06	6.29e-07	1.75e-06	7e-08	1.57e-07	1.55e-07	4.86e-08	1.61e-06	0.000182972	3.51e-06	5.21e-07	3.41e-06
Caulobacter sp. S6	5.36e-05	0.000107954	0	2.44e-06	0	3.91e-06	1.05e-07	3.14e-07	1.55e-07	0	2.14e-07	0.000434057	1.44e-05	2.6e-07	4.44e-06
Caulobacter vibrioides	7.5e-05	0.000148001	5.51e-07	4.43e-06	2.52e-07	3.09e-06	3.92e-06	4.39e-06	9.3e-07	6.81e-07	6.42e-07	0.000452755	1.74e-05	2.67e-06	5.98e-06
Cedecea lapagei	1.98e-05	2.61e-06	6.13e-08	9.22e-05	5.04e-07	0.000105378	1.82e-06	3.22e-05	4.17e-05	7.58e-05	0.000155617	3.47e-05	5.47e-05	0.000129675	2.25e-06
Cedecea neteri	0.00011943	2.44e-05	3.74e-06	0.000391299	3.07e-05	0.000441887	1.84e-05	0.000142754	0.000297728	0.000329279	0.000869488	0.000148247	0.000144506	0.000567436	1.25e-05
Cedecea sp. FDAARGOS_727	2.7e-05	5.22e-06	1.16e-06	0.000139591	1.89e-07	0.000199641	2.76e-06	4.53e-05	4.71e-05	9.8e-05	0.000264678	4.81e-05	3.63e-05	0.000152839	3.73e-06
Celeribacter baekdonensis	2.06e-05	0.000212425	1.84e-07	3.77e-06	1.89e-07	1.13e-06	4.55e-07	6.12e-06	3.1e-07	0	5.35e-07	5.21e-05	3.03e-07	3.25e-07	1.42e-06
Celeribacter ethanolicus	2.02e-05	6.36e-05	0	9.97e-07	0	5.15e-07	7e-08	1.73e-06	7.75e-07	4.86e-08	7.49e-07	9.48e-05	9.87e-06	3.25e-07	1.8e-06
Celeribacter indicus	1.83e-05	4.44e-05	2.57e-06	6.65e-07	0	8.23e-07	8.75e-07	1.73e-06	1.55e-07	4.38e-07	3.21e-07	0.000130885	6.05e-07	0	1.35e-06
Celeribacter marinus	1.39e-05	3.48e-06	0	3.32e-07	0	1.03e-06	1.01e-06	3.92e-06	1.55e-07	1.95e-07	0	4.81e-05	2.42e-07	5.21e-07	7.33e-06
Celerinatantimonas diazotrophica	2.38e-06	9.58e-06	4.76e-05	1.22e-06	6.29e-08	2.37e-06	1.75e-07	3.14e-07	7.29e-06	1.46e-07	5.89e-06	4.27e-05	9.08e-07	1.82e-06	6.43e-08
Cellulomonas chengniuliangii	7.54e-06	3.74e-05	2.45e-07	8.86e-07	0	1.03e-06	4.2e-07	0	0	4.86e-08	3.21e-07	7.61e-05	6.05e-07	3.25e-07	2.96e-06
Cellulomonas dongxiuzhuiae	7.54e-06	1.83e-05	2.45e-07	2.22e-07	0	9.26e-07	3.5e-08	6.27e-07	3.1e-07	1.46e-07	3.21e-07	9.48e-05	1.21e-06	0	1.8e-06
Cellulomonas fengjieae	2.3e-05	2.52e-05	3.68e-07	2.44e-06	0	5.15e-07	2.8e-07	0	0	0	0	7.21e-05	7.87e-07	2.8e-06	3.92e-06
Cellulomonas fimi	2.74e-05	4.7e-05	2.45e-07	1.55e-06	0	2.47e-06	2.8e-07	0	4.65e-07	0	1.07e-07	0.000168281	4.84e-07	0	2.77e-06
Cellulomonas flavigena	9.92e-06	4.61e-05	1.23e-07	8.86e-07	0	8.23e-07	0	1.57e-07	0	1.46e-07	0	5.74e-05	5.45e-07	0	1.54e-06
Cellulomonas gilvus	8.33e-06	2.61e-05	3.06e-07	5.54e-07	6.29e-08	1.03e-06	3.5e-08	0	0	4.86e-08	2.14e-07	8.95e-05	1.21e-07	0	1.93e-06
Cellulomonas iranensis	1.07e-05	2.7e-05	1.84e-07	8.86e-07	0	6.17e-07	0	1.57e-07	4.65e-07	1.46e-07	1.07e-07	6.14e-05	6.66e-07	0	1.29e-06
Cellulomonas palmilytica	5.95e-06	1.74e-05	0	4.43e-07	0	1.23e-06	3.5e-08	0	0	0	1.07e-07	6.54e-05	5.27e-06	0	1.16e-06
Cellulomonas shaoxiangyii	5.95e-06	9.32e-05	6.13e-08	5.54e-07	0	1.03e-07	0	0	0	4.86e-08	1.07e-07	0.000102838	6.05e-07	0	1.61e-06
Cellulomonas sp. ATA003	1.83e-05	8.53e-05	2.7e-06	1.33e-06	1.26e-07	4.12e-07	9.8e-07	0	0	4.86e-08	0	0.000106845	1.09e-06	0	3.28e-06
Cellulomonas sp. C5510	4.76e-06	3.4e-05	3.06e-07	2.22e-07	0	5.15e-07	1.4e-07	0	0	0	0	5.88e-05	3.03e-07	0	1.61e-06
Cellulomonas sp. ES6	6.35e-06	1.13e-05	1.1e-06	8.86e-07	0	1.03e-07	7e-08	1.57e-07	0	4.86e-08	0	7.75e-05	5.45e-07	6.51e-08	1.42e-06
Cellulomonas sp. H30R-01	6.35e-06	9.58e-06	2.45e-07	3.32e-07	0	1.03e-07	2.45e-07	0	0	2.92e-07	7.49e-07	0.000101503	6.66e-07	3.25e-07	1.93e-06
Cellulomonas sp. JZ18	9.13e-06	2.18e-05	0	5.54e-07	1.26e-07	3.09e-07	3.5e-08	3.14e-07	0	1.46e-07	4.28e-07	9.48e-05	6.54e-06	3.25e-07	1.74e-06
Cellulomonas sp. NS3	1.27e-05	2.96e-05	5.51e-07	1.44e-06	0	9.26e-07	1.05e-07	1.57e-07	0	1.95e-07	2.14e-07	0.000101503	1.15e-06	0	5.28e-06
Cellulomonas sp. PSBB021	8.73e-06	2.61e-05	1.78e-06	6.65e-07	0	3.09e-07	1.08e-06	3.14e-07	0	0	5.35e-07	8.01e-05	9.69e-07	0	1.48e-06
Cellulomonas sp. S1-8	1.11e-05	2.18e-05	2.45e-07	1.88e-06	6.29e-08	1.34e-06	0	0	7.75e-07	9.73e-08	0	6.54e-05	3.03e-07	0	1.61e-06
Cellulomonas sp. Y8	1.35e-05	3.48e-05	8.88e-06	1.22e-06	0	4.12e-07	3.29e-06	7.84e-07	3.1e-07	1.95e-07	1.07e-07	0.000104174	6.05e-07	1.3e-07	3.28e-06
Cellulomonas taurus	1.51e-05	0.000110566	0	4.43e-07	0	1.34e-06	5.95e-07	0	1.55e-07	1.95e-07	3.21e-07	5.61e-05	4.84e-07	6.51e-08	2.12e-06
Cellulomonas wangleii	7.94e-06	2.52e-05	1.84e-07	5.54e-07	0	1.03e-07	3.5e-08	0	0	9.73e-08	3.53e-06	6.81e-05	3.63e-07	1.3e-07	1.42e-06
Cellulomonas wangsupingiae	1.51e-05	2.7e-05	3.12e-06	2.22e-07	0	1.03e-07	1.15e-06	3.14e-07	5.43e-06	3.41e-07	9.63e-07	8.55e-05	3.03e-07	0	1.74e-06
Cellulomonas xiejunii	1.19e-06	1.48e-05	0	9.97e-07	0	1.03e-07	0	0	1.55e-07	9.73e-08	2.14e-07	5.88e-05	4.24e-07	0	2.77e-06
Cellulophaga algicola	3.13e-05	0.000158449	6.13e-08	5.54e-07	0	1.85e-06	3.5e-08	3.14e-07	2.33e-06	0	6.42e-07	2.54e-05	6.05e-07	2.54e-06	1.03e-06
Cellulophaga baltica	4.48e-05	0.000134942	2.45e-07	3.32e-07	0	6.17e-07	0	0	3.26e-06	0	2.14e-07	1.47e-05	8.48e-07	9.11e-07	1.09e-06
Cellulophaga lytica	3.37e-05	0.000278591	4.29e-07	0	0	8.23e-07	3.5e-08	3.14e-07	1.55e-06	0	4.28e-07	2.4e-05	1.03e-06	3.64e-06	7.72e-07
Cellulophaga omnivescoria	3.77e-05	9.32e-05	0	0	0	6.17e-07	7e-08	6.27e-07	2.79e-06	0	7.49e-07	1.87e-05	4.24e-07	9.76e-07	1.93e-07
Cellulophaga sp. HaHaR_3_176	2.62e-05	0.000185437	2.45e-07	3.32e-07	0	9.26e-07	7e-08	4.71e-07	9.92e-06	0	1.82e-06	3.74e-05	1.09e-06	3.19e-06	1.48e-06
Cellulophaga sp. L1A9	2.38e-05	0.000114048	0	3.32e-07	0	1.75e-06	0	0	4.96e-06	0	3.21e-07	1.07e-05	1.21e-06	1.17e-06	1.22e-06
Cellulosimicrobium cellulans	1.75e-05	4.7e-05	1.84e-06	5.54e-07	0	2.47e-06	3.15e-07	1.57e-07	0	0	0	0.000122872	8.48e-07	3.25e-07	2.83e-06
Cellulosimicrobium protaetiae	8.33e-06	1.22e-05	9.19e-07	1.11e-07	0	1.65e-06	0	0	0	0	3.21e-07	7.21e-05	8.48e-07	6.51e-08	6.43e-07
Cellvibrio japonicus	4.76e-06	7.84e-06	1.84e-06	2.1e-06	1.01e-06	2.88e-06	1.68e-06	1.25e-06	1.29e-05	2.92e-07	4.17e-06	6.01e-05	3.63e-07	1.3e-06	3.22e-06
Cellvibrio sp. KY-GH-1	8.33e-06	8.71e-06	4.17e-06	1.11e-06	6.29e-08	2.98e-06	2.13e-06	2.51e-06	0	4.86e-08	1.61e-06	8.28e-05	4.66e-06	8.46e-07	1.07e-05
Cellvibrio sp. KY-YJ-3	2.38e-06	8.71e-07	1.84e-07	7.76e-07	0	6.17e-07	1.75e-07	0	3.1e-07	9.73e-08	0	1.74e-05	2e-06	3.9e-07	4.31e-06
Cellvibrio sp. PSBB006	8.73e-06	2.7e-05	6.13e-08	4.21e-06	1.89e-07	4.43e-06	1.4e-07	3.14e-07	6.2e-06	2.43e-07	6.42e-07	6.01e-05	1.39e-06	1.56e-06	4.57e-06
Cellvibrio sp. PSBB023	2.38e-06	2.09e-05	0	3.55e-06	0	1.23e-05	2.34e-06	3.14e-07	0	2.09e-06	1.39e-06	5.34e-05	3.81e-06	2.8e-05	8.11e-06
Cellvibrio sp. QJXJ	1.83e-05	5.22e-06	0	7.76e-07	0	2.37e-06	8.75e-07	0	1.71e-06	9.24e-07	1.07e-06	2.94e-05	1.21e-07	1.07e-05	4.05e-06
Cereibacter azotoformans	3.57e-05	0.000271626	1.23e-07	1.77e-06	0	9.26e-07	7e-08	3.14e-07	0	1.95e-07	2.14e-07	0.000148247	2.12e-06	1.3e-07	6.43e-06
Cereibacter sphaeroides	4.44e-05	0.000305579	3.68e-07	1.11e-06	6.29e-08	2.88e-06	1.4e-07	0	6.2e-07	5.64e-06	5.35e-07	0.000223039	3.81e-06	3.38e-06	8.24e-06
Cetobacterium somerae	2.78e-06	6.53e-05	0	3.32e-07	0	6.17e-07	0	0	1.55e-07	0	0	1.6e-05	6.05e-08	0	1.87e-06
Chamaesiphon minutus	3.57e-06	2.18e-05	0	0	0	3.09e-07	0	0	4.65e-07	0	2.14e-07	6.94e-05	1.21e-06	0	1.42e-06
Changchengzhania lutea	3.13e-05	0.000207202	0	1.11e-07	0	7.2e-07	1.05e-07	3.14e-07	5.43e-06	0	0	3.47e-05	1.21e-06	7.42e-06	7.72e-07
Chania multitudinisentens	0.000131334	5.22e-06	4.04e-06	0.000105912	1.52e-05	3.61e-05	6.86e-06	6.84e-05	6.68e-05	5.08e-05	0.000318191	8.55e-05	0.000128463	0.00703858	2.07e-05
Chelativorans sp. AA-79	1.67e-05	0.000417016	4.17e-06	8.86e-07	6.29e-08	9.26e-07	7e-08	1.88e-06	3.1e-07	7.78e-07	2.03e-06	0.00020167	5.63e-06	3.25e-07	1.87e-06
Chelatococcus daeguensis	1.11e-05	0.000449228	3.68e-07	6.65e-07	0	1.03e-07	2.45e-07	1.88e-06	1.55e-07	1.46e-07	4.28e-07	0.00022571	3.09e-06	0	1.22e-06
Chelatococcus sp. CO-6	2.26e-05	0.000648594	3.06e-07	2.44e-06	0	1.44e-06	7e-08	7.84e-07	6.2e-07	9.73e-08	5.35e-07	0.000287146	7.51e-06	3.25e-07	2.44e-06
Chenggangzhangella methanolivorans	1.67e-05	0.00111349	0	2.99e-06	0	1.34e-06	7e-08	7.84e-07	0	4.86e-08	4.28e-07	0.000407346	9.81e-06	1.95e-06	5.34e-06
Chimaeribacter arupi	4.4e-05	1.48e-05	1.41e-06	0.00016341	9.76e-06	5.46e-05	6.23e-06	8.36e-05	5.3e-05	1.38e-05	7.8e-05	8.28e-05	0.000154616	0.000406594	5.28e-06
Chitinibacter bivalviorum	2.34e-05	0.000139295	8.88e-06	1.66e-06	0	1.85e-06	1.4e-07	3.14e-07	0	5.35e-07	2.57e-06	0.000106845	3.09e-06	3.51e-05	1.48e-06
Chitinibacter fontanus	1.27e-05	4.27e-05	6.13e-08	1.77e-06	6.17e-06	2.98e-06	3.5e-08	4.71e-06	6.36e-06	0	2.46e-06	9.08e-05	3.03e-07	2.69e-05	7.08e-07
Chitinimonas arctica	1.15e-05	4.27e-05	0	3.1e-06	0	4.63e-06	4.2e-07	1.25e-06	4.65e-07	2.19e-06	3e-06	0.000205676	3.49e-05	7.68e-06	4.31e-06
Chitinimonas koreensis	3.93e-05	0.000115789	3.06e-06	2.66e-06	1.95e-06	6.89e-06	2.45e-07	1.25e-06	3.1e-07	2.24e-06	2.35e-06	0.000397997	5.7e-05	3.97e-06	1.62e-05
Chitiniphilus sp. CD1	1.67e-05	7.66e-05	3.06e-07	7.76e-07	0	3.81e-06	4.9e-07	3.14e-07	1.24e-06	5.84e-07	3.53e-06	0.000188314	2.06e-05	6.12e-06	5.28e-06
Chitinolyticbacter meiyuanensis	1.47e-05	3.4e-05	0	1.55e-06	0	6.38e-06	3.5e-07	1.57e-06	1.55e-07	8.76e-07	3.42e-06	0.000211019	1.42e-05	1.05e-05	7.14e-06
Chitinophaga agri	1.23e-05	1.92e-05	0	5.54e-07	1.01e-06	3.09e-07	0	1.57e-07	3.1e-07	0	0	3.74e-05	4.24e-07	0	1.29e-07
Chitinophaga caeni	4.76e-06	3.31e-05	0	1.11e-07	0	1.03e-07	0	6.27e-07	1.55e-07	2.92e-07	0	6.81e-05	6.66e-07	1.95e-07	2.57e-07
Chitinophaga filiformis	1.03e-05	7.84e-06	0	5.54e-07	0	1.03e-07	0	0	0	9.73e-08	0	7.35e-05	5.45e-07	0	6.43e-07
Chitinophaga horti	1.15e-05	2.44e-05	0	3.32e-07	0	1.23e-06	3.5e-08	0	4.65e-07	0	0	8.41e-05	1.09e-06	0	1.09e-06
Chitinophaga oryzae	1.63e-05	1.83e-05	6.13e-08	4.43e-07	0	1.54e-06	1.05e-07	6.27e-07	1.55e-07	0	1.07e-07	9.08e-05	1.33e-06	4.75e-06	5.79e-07
Chitinophaga pinensis	1.83e-05	2.52e-05	0	5.1e-06	0	1.03e-06	3.5e-08	1.57e-07	1.71e-06	0	0	9.62e-05	1.15e-06	1.3e-07	5.79e-07
Chitinophaga sp. HK235	6.75e-06	1.04e-05	0	1.11e-06	0	5.15e-07	3.5e-08	0	0	0	1.39e-06	7.08e-05	6.66e-06	6.51e-08	3.28e-06
Chitinophaga sp. XS-30	4.36e-06	2.44e-05	0	3.32e-07	0	8.23e-07	1.05e-07	0	1.09e-06	2.92e-07	0	0.000109516	6.05e-07	0	8.36e-07
Chlamydia psittaci	0	3.48e-06	3.25e-06	1.11e-07	1.76e-06	4.12e-07	1.4e-06	6.27e-07	1.55e-07	2.53e-06	1.07e-07	6.68e-06	3.03e-07	2.6e-07	2.57e-07
Chloracidobacterium aggregatum	3.57e-06	9.58e-06	0	1.11e-07	2.52e-07	3.09e-07	3.5e-08	6.27e-07	1.55e-07	0	1.07e-07	0.000122872	1.39e-06	0	2.57e-07
Chloracidobacterium validum	6.75e-06	3.4e-05	0	1.11e-07	0	1.54e-06	1.4e-07	4.71e-07	0	0	1.07e-07	0.000110852	0	0	5.79e-07
Chlorobium limicola	1.59e-06	0.000107083	0	3.32e-07	0	2.06e-07	1.05e-07	1.57e-07	0	0	0	4.81e-05	2.42e-07	0	3.22e-07
Chloroflexus aggregans	5.55e-06	1.48e-05	0	0	0	4.12e-07	3.5e-08	0	0	0	0	7.21e-05	3.63e-06	2.02e-06	9.65e-07
Chloroflexus aurantiacus	1.19e-06	4.35e-06	0	4.43e-07	0	7.2e-07	1.4e-07	3.14e-07	5.58e-06	0	0	8.55e-05	1.21e-06	0	4.5e-07
Chloroherpeton thalassium	8.73e-06	4.35e-06	6e-06	1.11e-07	0	4.12e-07	0	0	1.55e-07	0	0	7.48e-05	6.05e-07	1.69e-06	1.29e-07
Chondrinema litorale	2.02e-05	6.88e-05	0	0	0	1.96e-06	3.5e-08	0	2.95e-06	0	1.07e-07	4.94e-05	7.87e-07	3.25e-06	5.15e-07
Chondrocystis sp. NIES-4102	3.57e-06	3.48e-05	0	1.11e-07	0	1.85e-06	0	0	0	0	1.07e-07	3.07e-05	2.06e-06	0	4.12e-06
Chondromyces crocatus	1.07e-05	4.61e-05	0	9.97e-07	1.2e-06	4.12e-07	7e-08	1.57e-07	1.55e-07	1.46e-07	5.35e-07	0.000816028	6.36e-06	1.5e-06	2.38e-06
Christiangramia echinicola	1.75e-05	2.79e-05	3.68e-07	1.11e-07	0	8.23e-07	1.4e-07	0	2.48e-06	0	1.07e-07	1.87e-05	6.66e-07	1.69e-06	4.31e-06
Christiangramia flava	1.94e-05	6.18e-05	0	1.77e-06	0	9.26e-07	7e-08	0	3.1e-07	0	2.14e-07	2.27e-05	6.05e-07	2.02e-06	1.09e-06
Christiangramia forsetii	2.54e-05	5.22e-05	6.13e-08	1.11e-07	6.29e-07	7.2e-07	0	1.57e-07	9.3e-07	0	3.21e-07	2.8e-05	6.66e-07	7.81e-06	1.42e-06
Christiangramia fulva	1.19e-05	0.00010186	0	2.22e-07	0	1.23e-06	3.5e-08	0	0	0	0	4.27e-05	6.66e-07	0	5.79e-07
Christiangramia salexigens	2.66e-05	0.00013146	9.19e-07	0	0	3.09e-07	0	0	3.1e-07	0	0	3.47e-05	3.03e-07	3.25e-07	5.15e-07
Chromobacterium amazonense	2.26e-05	2.7e-05	0	1.77e-06	0	1.34e-06	0	1.1e-06	0	3.41e-07	7.17e-06	6.94e-05	1.38e-05	1.63e-05	4.38e-06
Chromobacterium haemolyticum	1.19e-06	9.58e-06	6.13e-08	1.88e-06	0	8.23e-07	8.75e-07	3.61e-06	0	3.41e-07	1.07e-06	3.21e-05	3.63e-07	2.6e-07	4.5e-07
Chromobacterium paludis	1.31e-05	3.74e-05	0	6.65e-07	0	2.47e-06	7e-08	1.57e-07	4.65e-07	1.02e-06	1.61e-06	0.000104174	1.38e-05	4.42e-06	4.7e-06
Chromobacterium phragmitis	9.92e-06	1.65e-05	0	4.65e-06	4.41e-07	3.19e-06	5.25e-07	3.14e-07	1.55e-07	4.38e-07	7.49e-07	0.000106845	2.53e-05	3.12e-06	1.2e-05
Chromobacterium rhizoryzae	3.97e-06	1.74e-05	0	1.66e-06	0	1.03e-06	3.5e-08	5.8e-06	1.24e-06	0	1.07e-07	3.07e-05	3.63e-07	1.3e-07	1.35e-06
Chromobacterium sp. ATCC 53434	1.55e-05	5.48e-05	6.13e-08	1.44e-06	6.29e-08	1.44e-06	1.75e-07	1.1e-06	6.2e-07	2.43e-07	1.09e-05	0.000174958	4.27e-05	2.93e-06	1.99e-06
Chromobacterium sp. IIBBL 290-4	2.06e-05	3.05e-05	4.47e-06	1.22e-06	1.49e-05	3.4e-06	1.75e-07	7.53e-06	3.1e-07	4.86e-08	7.49e-07	9.48e-05	2.06e-05	8.46e-07	2.44e-06
Chromobacterium sp. Rain0013	7.14e-06	2.87e-05	0	7.76e-07	1.07e-06	6.17e-07	1.05e-07	3.61e-06	0	4.86e-08	2.03e-06	3.61e-05	7.33e-06	1.95e-07	5.02e-06
Chromobacterium vaccinii	1.79e-05	6.01e-05	1.84e-07	3.55e-06	3.21e-06	3.09e-06	8.4e-07	1.41e-06	9.3e-07	4.38e-07	2.89e-06	0.000138898	6.86e-05	8.46e-07	4.12e-06
Chromobacterium violaceum	1.83e-05	3.48e-05	0	9.97e-07	0	4.43e-06	8.05e-07	6.27e-07	1.55e-07	3.89e-07	6.42e-07	0.000158932	1.9e-05	7.09e-06	6.76e-06
Chromohalobacter salexigens	1.98e-06	7.84e-06	4.29e-07	4.21e-06	1.09e-05	2.37e-06	2.8e-07	2.51e-06	1.55e-07	7.3e-07	7.49e-07	9.62e-05	7.26e-06	1.63e-06	1.54e-06
Chroococcidiopsis sp. CCMEE 29	4.76e-06	1.13e-05	6.13e-08	3.32e-07	0	2.06e-07	1.05e-07	1.57e-07	0	0	1.07e-07	3.47e-05	1.94e-06	6.51e-08	6.43e-07
Chryseobacterium arthrosphaerae	3.85e-05	1.65e-05	1.23e-07	1.44e-05	6.29e-08	1.75e-06	1.4e-07	3.45e-06	3.1e-06	1.46e-07	3.42e-06	4.54e-05	4.84e-07	3.25e-07	6.43e-07
Chryseobacterium aureum	5.79e-05	2.61e-06	0	4.03e-05	0	8.23e-07	0	9.41e-07	1.88e-05	0	1.5e-06	2.94e-05	3.03e-07	1.3e-07	5.15e-07
Chryseobacterium balustinum	1.55e-05	0.00116051	1.23e-07	4.54e-05	0	3.47e-05	1.4e-07	3.14e-07	2.64e-06	0	2.46e-06	3.07e-05	3.63e-07	4.55e-06	7.08e-06
Chryseobacterium bernardetii	3.97e-06	3.48e-06	0	2.66e-06	0	7.2e-07	0	6.27e-07	6.2e-06	0	2.14e-07	1.2e-05	0	5.66e-06	9.65e-07
Chryseobacterium camelliae	2.3e-05	3.92e-05	3.98e-06	8.09e-06	0	1.44e-06	7e-08	1.57e-07	3.1e-07	0	1.5e-06	5.08e-05	2.48e-06	4.36e-06	1.42e-06
Chryseobacterium capnotolerans	1.39e-05	2.52e-05	6.13e-08	6.76e-06	6.29e-08	3.09e-07	0	1.57e-07	7.75e-07	1.22e-06	3.42e-06	1.07e-05	3.63e-07	2.73e-06	1.09e-06
Chryseobacterium carnipullorum	2.14e-05	3.48e-05	8.7e-06	3.16e-05	0	8.23e-07	3.5e-08	5.18e-06	6.82e-06	0	2.54e-05	4.41e-05	2.42e-07	0	2.44e-06
Chryseobacterium cucumeris	5.95e-06	1.48e-05	0	1.24e-05	0	0	7e-08	3.14e-07	2.64e-06	0	5.35e-07	5.34e-06	0	3.12e-06	7.08e-07
Chryseobacterium daecheongense	5.55e-06	4e-05	0	4.43e-06	0	1.03e-07	0	0	3.1e-06	0	4.28e-07	1.2e-05	3.63e-07	8.59e-06	8.36e-07
Chryseobacterium faecale	2.38e-06	1.57e-05	0	3.32e-06	0	5.15e-07	3.5e-08	1.57e-07	0	0	2.14e-07	1.87e-05	3.63e-07	0	7.14e-06
Chryseobacterium gallinarum	1.19e-05	1.57e-05	6.13e-08	7.87e-06	0	3.09e-07	3.5e-08	1.57e-07	2.95e-06	0	1.39e-06	3.07e-05	3.63e-07	6.51e-08	6.43e-07
Chryseobacterium gambrini	7.14e-06	2e-05	0	9.86e-06	0	5.15e-07	1.05e-07	0	4.5e-06	0	1.39e-06	3.21e-05	9.69e-07	3.97e-06	9.01e-07
Chryseobacterium glaciei	3.97e-06	0.00014539	4.9e-07	1.19e-05	0	8.23e-07	0	6.27e-07	1.55e-07	0	1.5e-06	3.61e-05	4.84e-07	3.45e-06	1.42e-06
Chryseobacterium gleum	1.63e-05	3.48e-05	1.23e-07	1.84e-05	0	3.09e-07	3.5e-08	1.57e-07	3.88e-06	0	1.71e-06	2e-05	3.63e-07	3.19e-06	1.22e-06
Chryseobacterium indologenes	7.38e-05	6.36e-05	3.64e-05	6.75e-05	0	1.75e-06	1.4e-07	3.14e-07	6.2e-06	4.86e-08	5.24e-06	7.48e-05	1.82e-06	2.32e-05	2.9e-06
Chryseobacterium indoltheticum	9.32e-05	0.000244638	6.8e-06	3.97e-05	0	8.13e-06	1.05e-07	9.41e-07	4.96e-06	9.73e-08	7.49e-07	4.41e-05	6.05e-07	1.69e-05	5.6e-06
Chryseobacterium joostei	1.35e-05	1.83e-05	0	6.64e-05	0	6.17e-07	0	3.14e-07	1.55e-07	3.89e-07	9.63e-07	3.21e-05	3.03e-07	4.88e-06	8.36e-07
Chryseobacterium lactis	1.35e-05	3.48e-05	0	9.31e-06	0	5.15e-07	0	0	2.48e-06	0	1.61e-06	2.54e-05	7.26e-07	4.88e-06	4.5e-07
Chryseobacterium manosquense	1.15e-05	9.58e-05	2.7e-06	1.22e-06	0	7.2e-07	0	0	2.02e-06	0	1.07e-07	2.67e-05	7.26e-07	3.45e-06	4.76e-06
Chryseobacterium nakagawai	1.27e-05	8.27e-05	1.23e-07	3.1e-06	0	1.03e-06	3.5e-08	3.14e-07	4.03e-06	0	3.21e-07	8.01e-06	0	6.51e-08	9.01e-07
Chryseobacterium nepalense	6.35e-06	8.71e-06	0	1.77e-06	0	2.06e-07	1.05e-07	1.1e-06	9.92e-06	0	2.14e-07	2.67e-06	2.42e-07	0	3.86e-07
Chryseobacterium oranimense	1.43e-05	8.71e-06	0	1.83e-05	0	7.2e-07	0	0	0	4.86e-08	1.09e-05	2.94e-05	4.84e-07	3.25e-07	3.86e-07
Chryseobacterium oryzae	9.52e-06	4.44e-05	6.13e-08	4.1e-06	0	4.12e-07	0	0	6.2e-07	4.86e-08	1.28e-06	3.34e-05	9.08e-07	6.7e-06	1.67e-06
Chryseobacterium paludis	8.33e-06	8.62e-05	1.23e-07	5.87e-06	0	1.44e-06	7e-08	1.57e-07	4.65e-06	0	1.93e-06	3.34e-05	2.42e-07	7.87e-06	1.03e-06
Chryseobacterium panacisoli	7.54e-06	1.04e-05	0	9.97e-06	0	4.12e-07	0	0	0	0	2.14e-07	0	3.03e-07	7.35e-06	6.43e-08
Chryseobacterium piperi	4.21e-05	7.75e-05	6.13e-08	5.21e-06	0	5.15e-07	7e-08	1.57e-07	3.41e-06	0	9.63e-07	1.07e-05	3.03e-07	6.64e-06	9.01e-07
Chryseobacterium salivictor	1.63e-05	2.52e-05	0	6.65e-07	0	1.23e-06	0	1.57e-07	3.1e-07	0	1.07e-07	8.01e-06	6.05e-08	0	2.51e-06
Chryseobacterium shandongense	2.86e-05	4.88e-05	0	6.76e-06	0	1.34e-06	3.15e-07	1.1e-06	1.15e-05	0	5.35e-07	2.4e-05	4.24e-07	1.43e-06	2.19e-06
Chryseobacterium sp.	3.21e-05	3.31e-05	6.13e-08	8.53e-06	0	1.03e-06	3.5e-08	0	5.74e-06	0	7.49e-07	4.14e-05	6.66e-07	2.08e-06	2.83e-06
Chryseobacterium sp. 3008163	3.17e-05	0.000130589	0	1.3e-05	0	2.88e-06	0	0	3.1e-07	0	3.21e-07	2.67e-05	4.84e-07	3.9e-07	3.15e-06
Chryseobacterium sp. 6424	2.38e-06	1.92e-05	0	1.33e-06	0	3.09e-07	3.5e-08	2.2e-06	1.71e-06	0	1.07e-07	2e-05	3.63e-07	0	1.48e-06
Chryseobacterium sp. CX-624	5.16e-06	1.04e-05	6.13e-08	1.22e-06	0	1.03e-06	1.4e-07	7.84e-07	0	0	1.07e-07	2.27e-05	3.03e-07	0	3.15e-06
Chryseobacterium sp. CY350	3.17e-05	8.27e-05	0	1.32e-05	0	2.16e-06	0	0	3.1e-07	0	3.21e-07	1.74e-05	3.63e-07	9.76e-07	2.77e-06
Chryseobacterium sp. G0162	7.14e-06	8.01e-05	0	5.54e-06	0	2.06e-07	0	1.57e-07	0	0	1.5e-06	8.01e-06	1.82e-07	0	3.22e-07
Chryseobacterium sp. G0186	2.54e-05	2.26e-05	0	1.43e-05	0	7.2e-07	0	1.57e-07	3.88e-06	0	1.71e-06	2.14e-05	2.42e-07	3.32e-06	2.57e-07
Chryseobacterium sp. G0201	3.49e-05	0.000210684	6.13e-08	1.86e-05	0	1.03e-06	1.05e-07	0	3.1e-07	0	1.61e-06	5.34e-05	1.21e-07	5.99e-06	1.48e-06
Chryseobacterium sp. IHB B 17019	1.19e-05	8.01e-05	0	1.31e-05	0	4.12e-07	0	0	1.4e-06	0	5.35e-07	2.27e-05	2.42e-07	6.51e-08	6.43e-07
Chryseobacterium sp. LJ668	4.76e-06	6.44e-05	0	7.53e-06	0	1.34e-06	7e-08	1.57e-07	3.72e-06	0	9.63e-07	1.74e-05	3.03e-07	0	1.54e-06
Chryseobacterium sp. MA9	1.63e-05	3.22e-05	6.13e-08	4.76e-05	0	1.03e-07	7e-08	0	3.1e-07	0	1.93e-06	2.27e-05	3.63e-07	0	7.08e-07
Chryseobacterium sp. MEBOG06	1.86e-05	2.09e-05	0	1.52e-05	0	1.03e-07	3.5e-08	0	0	0	2.03e-06	2e-05	0	2.6e-07	3.22e-07
Chryseobacterium sp. MEBOG07	0.00306829	1.92e-05	2.08e-06	0.000986999	6.29e-08	3.09e-07	7e-08	1.57e-07	1.09e-06	0	2.89e-06	0.000442071	1.15e-06	4.55e-07	1.99e-06
Chryseobacterium sp. MMS21-Ot14	9.52e-06	2.7e-05	0	8.42e-06	0	3.09e-07	0	6.27e-07	5.74e-06	0	1.61e-06	2.14e-05	6.05e-08	0	5.15e-07
Chryseobacterium sp. POL2	4.17e-05	0.000224614	0	1.11e-06	0	9.26e-07	1.75e-07	1.57e-07	7.29e-06	0	1.07e-07	3.47e-05	6.05e-07	2.28e-06	5.79e-07
Chryseobacterium sp. SNU WT5	1.79e-05	0.000107083	0	2.55e-06	0	9.26e-07	3.5e-07	0	4.96e-06	0	1.07e-07	1.07e-05	9.08e-07	0	6.76e-06
Chryseobacterium sp. StRB126	3.06e-05	1.74e-05	6.74e-07	9.2e-06	0	3.09e-07	0	1.57e-07	7.75e-07	0	1.39e-06	2.14e-05	2.42e-07	3.9e-07	7.08e-07
Chryseobacterium sp. T16E-39	3.06e-05	1.57e-05	0	4.99e-06	0	6.17e-07	7e-08	1.57e-07	3.41e-06	0	9.63e-07	2.8e-05	4.84e-07	1.5e-06	1.03e-06
Chryseobacterium sp. wcd7	2.3e-05	1.31e-05	0	1.44e-06	0	4.12e-07	7e-08	1.57e-07	0	0	3.21e-07	2e-05	4.84e-07	7.81e-07	2.57e-06
Chryseobacterium sp. Y16C	1.79e-05	4.27e-05	0	8.09e-06	0	1.54e-06	0	0	0	0	4.28e-07	1.34e-05	6.05e-08	5.86e-07	1.22e-06
Chryseobacterium sp. ZHDP1	6.75e-06	4.96e-05	0	5.98e-06	0	1.03e-07	7e-08	1.57e-07	9.3e-07	0	1.07e-06	2.8e-05	4.24e-07	4.42e-06	9.65e-07
Chryseobacterium suipulveris	1.03e-05	2.61e-05	0	1.11e-06	0	8.23e-07	3.5e-08	0	3.1e-07	0	3.21e-07	3.87e-05	6.05e-07	1.95e-07	4.05e-06
Chryseobacterium taklimakanense	9.52e-06	9.05e-05	0	1.55e-06	0	4.84e-06	0	0	1.55e-07	4.86e-08	2.14e-07	5.61e-05	6.66e-07	1.3e-07	1.67e-06
Chryseobacterium turcicum	2.02e-05	2.87e-05	0	9.97e-06	0	2.57e-06	0	1.57e-07	2.02e-06	0	1.39e-06	2.4e-05	5.45e-07	3.71e-06	2.25e-06
Chryseolinea soli	1.19e-05	0.000100119	6.43e-06	9.97e-07	0	3.09e-07	2.8e-07	0	0	0	3.21e-07	0.000142905	4.9e-06	1.3e-07	9.78e-06
Chthonomonas calidirosea	2.78e-06	1.74e-06	0	3.32e-07	0	0	2.1e-07	0	0	0	0	0.000129549	1.82e-07	0	1.29e-07
Ciceribacter thiooxidans	1.31e-05	0.000267273	1.84e-07	4.43e-07	0	9.26e-07	2.1e-07	4.08e-06	1.24e-06	8.76e-07	3.21e-07	0.000140234	1.15e-06	0	1.22e-06
Citricoccus sp. I39-566	5.95e-06	1.31e-05	0	7.76e-07	0	9.26e-07	3.5e-07	0	0	1.46e-07	1.07e-07	6.41e-05	3.03e-07	0	2.38e-06
Citricoccus sp. SGAir0253	4.76e-06	3.13e-05	1.23e-07	7.76e-07	0	1.13e-06	9.1e-07	0	0	4.86e-08	0	8.28e-05	1.27e-06	1.3e-07	2.32e-06
Citrifermentans bemidjiense	3.57e-06	5.05e-05	0	5.54e-07	0	6.17e-07	3.5e-08	0	0	4.86e-08	0	0.000313857	3.03e-07	0	8.36e-07
Citrifermentans bremense	7.54e-06	1.92e-05	0	6.65e-07	2.52e-07	1.44e-06	0	1.57e-07	0	0	1.07e-07	0.000243072	4.24e-07	2.6e-07	7.08e-06
Citrobacter amalonaticus	3.17e-05	2.61e-06	6.13e-08	5.88e-05	1.26e-07	5.36e-05	7.56e-06	4e-05	3.83e-05	2.43e-05	0.00013175	4.01e-05	2.95e-05	0.000121607	1.22e-06
Citrobacter arsenatis	1.98e-05	6.96e-06	0	2.48e-05	1.89e-06	2.11e-05	3.92e-06	2.45e-05	2.33e-05	1.75e-05	5.3e-05	1.6e-05	1.2e-05	7.98e-05	3.22e-07
Citrobacter braakii	3.41e-05	4.35e-06	9.8e-07	7.43e-05	1.37e-05	4.95e-05	2.53e-05	7.64e-05	2.9e-05	3.31e-05	0.000148339	2.94e-05	1.05e-05	0.000104105	5.15e-07
Citrobacter cronae	4.36e-06	0	0	2.68e-05	2.45e-05	1.1e-05	7.7e-07	1.41e-05	1.01e-05	1.1e-05	2.07e-05	1.74e-05	4.78e-06	2.95e-05	6.43e-08
Citrobacter farmeri	3.69e-05	1.83e-05	6.13e-08	8.61e-05	5.73e-06	7.37e-05	2.87e-06	4.91e-05	4.59e-05	2.68e-05	0.000182267	4.27e-05	4e-05	0.000147113	7.72e-07
Citrobacter freundii	0.000133318	4.18e-05	2.27e-06	0.000622067	8.12e-06	0.000200567	1.14e-05	0.0261633	0.000252604	0.000191954	0.000545089	0.000158932	0.00381865	0.00034322	0.000822199
Citrobacter freundii complex sp. CFNIH2	8.73e-06	0	6.13e-08	1.32e-05	6.29e-08	1.01e-05	3.25e-06	8.16e-06	1.02e-05	1.08e-05	1.58e-05	9.35e-06	7.45e-06	1.09e-05	1.09e-05
Citrobacter freundii complex sp. CFNIH3	0	0	0	2.1e-06	0	1.03e-06	0	1.73e-06	1.89e-05	3.31e-06	3.32e-06	0	0	1.3e-07	0
Citrobacter koseri	1.51e-05	0	0	5.11e-05	1.45e-06	3.93e-05	1.75e-06	3.62e-05	2.87e-05	1.12e-05	0.000103174	3.21e-05	0.000199838	4.65e-05	4.37e-05
Citrobacter pasteurii	2.06e-05	4.35e-06	0	3.25e-05	7.62e-06	2.94e-05	2.1e-07	1.74e-05	1.38e-05	1.44e-05	0.000108097	1.74e-05	5.89e-05	0.000113865	7.01e-06
Citrobacter portucalensis	5.2e-05	9.58e-06	4.9e-07	0.000161527	5.6e-06	7.14e-05	6.65e-06	0.000222445	4.68e-05	3.86e-05	0.000118586	4.67e-05	0.000192997	0.000239115	2.19e-06
Citrobacter rodentium	2.66e-05	1.31e-05	6.13e-08	0.000125189	5.67e-07	5.6e-05	2.8e-06	3.51e-05	3.12e-05	2.85e-05	0.000162253	4.14e-05	4.44e-05	0.000137613	5.15e-07
Citrobacter sedlakii	5.95e-06	0	1.23e-07	9.31e-06	0	7.2e-06	2.8e-07	5.8e-06	7.44e-06	1.61e-06	4.14e-05	4.01e-06	6.05e-08	2.42e-05	0
Citrobacter sp. BDA59-3	2.82e-05	5.22e-06	1.23e-07	3.56e-05	0	2.73e-05	2.8e-07	1.71e-05	2.26e-05	9.58e-06	3.21e-05	1.47e-05	1.16e-05	2.62e-05	1.29e-07
Citrobacter sp. CF971	0	8.71e-07	0	4.65e-06	0	8.23e-07	3.5e-08	9.41e-07	1.55e-07	9.73e-08	1.39e-06	5.34e-06	6.05e-08	8.46e-06	1.29e-07
Citrobacter sp. CFNIH10	6.35e-06	0	1.1e-06	3.77e-06	8.81e-07	1.65e-06	1.4e-07	9.41e-07	2.48e-06	4.38e-07	3.96e-06	0	2.72e-06	0	0
Citrobacter sp. Colony219	0	0	0	1.66e-06	0	1.85e-06	0	4.08e-06	1.07e-05	1.46e-07	4.39e-06	0	0	6.51e-08	0
Citrobacter sp. CRE-46	3.97e-07	0	0	1.55e-06	3.78e-07	2.57e-06	7e-08	2.82e-06	4.19e-06	3.7e-06	1.8e-05	2.67e-06	4.78e-06	1.11e-06	1.29e-07
Citrobacter sp. FDAARGOS_156	2.78e-06	8.71e-07	6.13e-08	1.22e-06	3.15e-07	3.29e-06	0	2.51e-06	7.75e-07	1.41e-06	1.59e-05	0	6.05e-08	1.95e-07	0
Citrobacter sp. MGH 55	2.78e-06	0	3.02e-05	2.44e-06	0	2.47e-06	1.75e-07	2.2e-06	1.09e-06	2.48e-06	1.08e-05	0	0	0	6.43e-08
Citrobacter sp. R56	1.63e-05	0	4.23e-06	5.15e-05	1.08e-05	3.75e-05	8.05e-07	1.96e-05	2.48e-05	2.07e-05	0.000106278	1.2e-05	1.99e-05	0.000117248	9.65e-07
Citrobacter sp. RHB25-C09	4.6e-05	1.04e-05	0	6.06e-05	8.62e-06	6.23e-05	1.5e-06	3.55e-05	0.000123123	3.2e-05	0.000141597	2.8e-05	1.99e-05	0.000103389	3.86e-07
Citrobacter sp. RHB35-C17	0	0	0	2.1e-06	0	1.44e-06	0	1.57e-06	0	9.73e-08	1.5e-06	0	0	1.17e-05	0
Citrobacter sp. RHB35-C21	7.94e-07	0	0	3.77e-06	0	1.03e-06	0	3.14e-07	1.09e-06	0	7.28e-06	0	1.07e-05	0	0
Citrobacter sp. RHB36-C18	0	0	0	0	0	2.06e-07	0	1.1e-06	1.55e-07	0	1.28e-05	1.34e-06	0	0	0
Citrobacter sp. RHBSTW-00127	0	0	0	3.32e-07	4.15e-06	5.45e-06	0	1.88e-06	0	8.27e-07	4.28e-07	0	0	0	0
Citrobacter sp. RHBSTW-00229	3.97e-07	0	0	1.11e-07	8.31e-06	0	0	1.1e-06	6.2e-07	1.46e-07	0	0	0	0	6.43e-08
Citrobacter sp. RHBSTW-00570	5.16e-06	0	0	2.44e-06	0	2.06e-07	1.64e-06	9.41e-07	1.55e-07	4.86e-08	1.01e-05	2.67e-06	2e-06	0	1.29e-07
Citrobacter sp. RHBSTW-00944	0	0	0	6.31e-06	0	8.54e-06	0	1.88e-06	4.65e-06	0	3.78e-05	1.34e-06	0	0	0
Citrobacter sp. RHBSTW-00986	0	8.71e-07	0	2.88e-06	0	2.37e-06	3.5e-08	1.57e-07	6.2e-07	0	2.57e-06	4.01e-06	2.67e-05	3.9e-07	0
Citrobacter sp. RHBSTW-01013	5.16e-06	0	0	2.22e-07	0	1.96e-06	0	3.76e-06	1.55e-07	3.02e-06	2.86e-05	0	6.05e-08	6.51e-08	0
Citrobacter sp. S171	2.02e-05	6.96e-06	2.33e-06	4.37e-05	6.11e-06	3.47e-05	1.82e-06	2.37e-05	2.68e-05	2.21e-05	6.72e-05	1.07e-05	3.01e-05	6.78e-05	6.43e-07
Citrobacter sp. TSA-1	1.98e-06	0	0	1.99e-06	0	1.03e-06	0	1.57e-06	5.74e-06	1.56e-06	2.16e-05	0	1.82e-07	0	1.93e-07
Citrobacter sp. XT1-2-2	0	0	0	1.11e-07	0	9.26e-07	0	6.27e-07	0	4.86e-08	1.07e-07	1.34e-06	0	5.4e-06	0
Citrobacter tructae	1.98e-05	4.35e-06	1.35e-05	7.46e-05	1.95e-06	5.22e-05	1.89e-06	4.16e-05	3.77e-05	2.48e-05	0.000137637	3.21e-05	2.75e-05	0.000144966	3.22e-07
Citrobacter werkmanii	1.07e-05	3.48e-06	6.13e-08	0.000146349	2.08e-06	2.42e-05	1.29e-06	4.06e-05	1.64e-05	1.61e-05	6.15e-05	3.34e-05	1.28e-05	1.15e-05	4.5e-07
Citrobacter youngae	1.98e-06	0	7.96e-07	6.2e-06	0	5.97e-06	1.4e-07	1.15e-05	2.02e-06	2.29e-06	8.46e-06	4.01e-06	0	5.14e-06	6.43e-08
Citromicrobium sp. JL477	2.74e-05	1.92e-05	6.13e-08	6.65e-07	0	3.09e-07	2.45e-07	0	0	0	1.07e-07	0.000117529	4.36e-06	0	2.83e-06
Clavibacter capsici	9.13e-06	1.48e-05	0	1.22e-06	0	5.15e-07	3.5e-08	9.41e-07	3.1e-07	0	0	5.34e-05	2.42e-07	0	1.48e-06
Clavibacter michiganensis	2.7e-05	4e-05	1.23e-07	5.76e-06	1.26e-06	1.18e-05	3.5e-08	3.14e-07	1.55e-07	9.73e-08	1.07e-07	0.000161603	9.69e-07	2.08e-06	5.08e-06
Clavibacter sp. A6099	1.19e-06	1.13e-05	0	1.22e-06	0	9.26e-07	0	0	0	0	3.21e-07	2.54e-05	6.05e-08	0	3.54e-06
Clavibacter zhangzhiyongii	5.55e-06	9.58e-06	3.06e-07	4.43e-07	0	0	1.75e-07	0	0	0	1.5e-06	3.61e-05	7.75e-06	0	1.29e-06
Cloacibacillus porcorum	1.19e-06	2.61e-06	1.26e-05	1.11e-07	0	1.03e-07	0	0	0	4.86e-08	0	8.15e-05	2.42e-07	7.81e-07	5.79e-07
Cloacibacterium caeni	1.15e-05	7.4e-05	0	6.65e-07	0	1.03e-06	7e-08	1.57e-07	1.71e-06	0	0	3.07e-05	9.69e-07	1.5e-06	6.05e-06
Cloacibacterium normanense	9.92e-06	3.66e-05	0	0	0	0	0	1.57e-07	0	0	2.57e-06	9.35e-06	0	0	1.16e-06
Cloacibacterium sp. TD35	1.39e-05	8.53e-05	1.23e-07	3.32e-07	0	7.2e-07	7e-08	3.14e-07	1.55e-07	0	0	1.74e-05	1.09e-06	0	1.22e-06
Clostridioides difficile	1.03e-05	1.48e-05	1.84e-07	6.65e-07	6.29e-08	9.26e-07	3.5e-08	0	0	3.89e-07	7.49e-07	8.15e-05	4.84e-07	1.3e-07	3.54e-06
Clostridioides sp. ES-S-0054-01	7.94e-07	8.1e-05	6.13e-08	0	0	0	0	0	0	0	0	4.01e-06	6.05e-08	0	0
Clostridium aceticum	2.98e-05	1.74e-06	0	2.22e-07	0	7.2e-07	0	0	0	0	1.07e-07	2.8e-05	0	6.51e-08	1.29e-07
Clostridium acetobutylicum	1.59e-06	4.53e-05	0	1.11e-07	0	1.03e-07	0	0	0	0	0	1.6e-05	1.82e-07	2.46e-05	1.93e-07
Clostridium argentinense	7.94e-06	0.000141907	1.84e-07	0	0	2.06e-07	0	0	1.24e-06	0	0	2.67e-05	5.45e-07	1.3e-07	3.86e-07
Clostridium beijerinckii	1.23e-05	4.18e-05	0	4.43e-07	1.89e-07	9.26e-07	3.5e-08	0	5.58e-06	1.46e-07	1.07e-07	5.21e-05	4.24e-07	5.53e-06	7.08e-07
Clostridium bornimense	4.36e-06	6.62e-05	0	0	0	3.09e-07	0	0	0	0	0	2.8e-05	2.42e-07	0	6.43e-08
Clostridium botulinum	3.65e-05	6.44e-05	4.47e-06	8.86e-07	0	2.37e-06	0	0	2.02e-06	4.86e-08	1.82e-06	0.000112187	2.54e-06	2.6e-07	1.99e-06
Clostridium estertheticum	1.27e-05	6.62e-05	6.13e-08	1.66e-06	0	3.4e-06	8.75e-07	1.73e-06	6.2e-07	8.76e-07	1.71e-06	9.22e-05	1.57e-06	1.17e-06	1.09e-06
Clostridium gasigenes	2.78e-06	0.000105342	0	0	0	1.03e-06	0	0	4.65e-07	0	0	4.41e-05	4.84e-07	0	3.86e-07
Clostridium gelidum	4.64e-05	0.000113178	0	3.32e-07	0	5.15e-06	0	1.57e-07	0	0	0	4.14e-05	5.45e-07	1.37e-06	6.76e-06
Clostridium kluyveri	5.16e-06	0.000258567	0	4.43e-07	0	5.15e-07	7e-08	1.1e-06	7.75e-07	0	1.07e-07	5.34e-05	1.82e-07	7.16e-07	4.5e-07
Clostridium pasteurianum	9.92e-06	4e-05	0	1.11e-07	0	1.65e-06	7e-08	1.57e-07	7.75e-07	0	2.14e-07	4.01e-05	3.63e-07	1.95e-07	3.86e-07
Clostridium perfringens	2.02e-05	5.92e-05	1.84e-07	9.97e-07	6.29e-08	1.23e-06	3.5e-08	4.71e-07	2.17e-06	3.89e-07	9.63e-07	6.41e-05	8.48e-07	1.89e-06	1.42e-05
Clostridium saccharoperbutylacetonicum	9.13e-06	4.18e-05	0	5.54e-07	0	1.23e-06	1.05e-07	1.57e-07	0	0	2.14e-07	4.67e-05	3.63e-07	0	1.48e-06
Clostridium sp. DL-VIII	4.76e-06	2.61e-05	1.84e-06	1.11e-07	0	7.2e-07	0	0	7.75e-07	0	0	1.34e-05	3.63e-07	6.51e-08	8.36e-07
Clostridium sp. M62/1	3.97e-07	0	1.08e-05	0	0	0	0	0	0	0	0	6.68e-06	6.05e-08	0	1.09e-06
Clostridium tagluense	4.76e-06	4.18e-05	3.86e-06	1.11e-07	0	4.22e-06	3.5e-08	0	0	0	1.07e-07	4.67e-05	2.42e-07	0	4.5e-07
Clostridium tetani	3.97e-07	1.74e-05	8.39e-06	0	0	3.09e-07	0	1.57e-07	2.33e-06	0	4.28e-07	2.14e-05	1.21e-07	0	3.22e-07
Clostridium tyrobutyricum	2.78e-06	5.22e-06	4.17e-06	1.11e-07	0	2.06e-07	0	0	0	0	0	2.14e-05	6.05e-08	0	6.43e-08
Cnuibacter physcomitrellae	2.22e-05	3.48e-05	0	1.55e-06	0	4.73e-06	7e-08	3.14e-07	0	0	0	0.000106845	7.87e-07	0	2.57e-06
Cobetia pacifica	1.98e-06	1.74e-06	0	0	0	2.78e-06	1.4e-07	0	0	0	0	6.68e-06	4.96e-06	7.81e-07	0
Cobetia sp. 4B	1.98e-06	0	0	2.22e-07	0	1.34e-06	2.48e-06	0	1.55e-07	4.86e-08	3.21e-07	8.01e-06	0	0	8.36e-07
Cobetia sp. cqz5-12	1.59e-06	2.61e-05	6.13e-08	1.99e-06	0	2.26e-06	5.6e-07	1.57e-07	1.55e-07	3.89e-07	2.14e-07	1.6e-05	5.45e-07	6.51e-08	2.57e-07
Cobetia sp. L2A1	1.31e-05	3.74e-05	1.84e-07	8.42e-06	6.29e-08	3.6e-06	1.43e-06	1.57e-07	1.24e-06	2.43e-07	5.35e-07	3.21e-05	2.78e-06	1.14e-05	8.36e-07
Cognaticolwellia beringensis	7.94e-07	2.61e-06	1.96e-06	1.88e-06	2.77e-06	1.96e-06	6.65e-07	1.1e-06	1.91e-05	1.12e-06	8.56e-07	1.2e-05	4.24e-07	0	0
Cognatishimia activa	1.55e-05	4.27e-05	0	7.76e-07	0	1.23e-06	1.26e-06	1.38e-05	0	0	1.5e-06	7.21e-05	7.87e-07	5.21e-07	7.72e-07
Cohaesibacter sp. ES.047	8.33e-06	0.000195014	0	3.32e-07	0	1.54e-06	5.95e-07	5.65e-06	9.3e-07	6.32e-07	1.07e-07	0.000109516	6.66e-07	5.86e-07	9.65e-07
Cohnella candidum	8.33e-06	5.22e-06	0	3.66e-06	0	7.2e-07	0	9.41e-07	1.55e-07	0	0	9.08e-05	2.42e-07	0	6.43e-07
Cohnella sp. LGH	1.98e-06	3.13e-05	0	4.43e-07	0	7.2e-07	0	0	0	0	0	7.21e-05	1.82e-07	0	2.57e-07
Collimonas arenae	6.43e-05	0.00021939	8.03e-06	1.07e-05	3.78e-07	1.55e-05	4.97e-06	3.92e-06	2.17e-06	4.23e-06	8.46e-06	0.000411353	0.000230047	1.45e-05	1.57e-05
Collimonas fungivorans	6.31e-05	0.000150613	2.51e-06	7.98e-06	1.7e-06	2.31e-05	5.25e-07	1.41e-06	1.55e-06	3.89e-06	8.24e-06	0.000364608	0.000346039	1.38e-05	1.47e-05
Collimonas pratensis	5.08e-05	9.32e-05	1.81e-05	1.15e-05	6.29e-08	1.2e-05	6.37e-06	9.41e-07	1.86e-06	2.19e-06	2.78e-06	0.00026177	0.00018888	8.72e-06	1.08e-05
Collinsella aerofaciens	4.76e-06	1.22e-05	0	3.32e-06	0	7.2e-07	0	0	0	0	0	0.000126878	2.42e-07	6.51e-08	5.23e-05
Collinsella stercoris	7.94e-07	4e-05	0	5.32e-06	0	1.03e-06	0	0	0	0	0	8.28e-05	0	0	1.25e-05
Colwellia psychrerythraea	4.76e-06	8.71e-06	1.23e-07	6.65e-07	4.53e-06	3.09e-06	7.35e-07	6.27e-07	9.92e-06	0	0	3.21e-05	0	3.9e-07	1.93e-07
Colwellia sp. 20A7	3.97e-06	1.57e-05	1.5e-05	1.11e-07	6.29e-07	1.96e-06	1.05e-07	1.25e-06	1.01e-05	0	1.07e-07	2.14e-05	6.05e-08	2.6e-07	2.77e-06
Colwellia sp. Arc7-635	3.57e-06	3.48e-06	3.68e-07	1.22e-06	6.17e-06	2.78e-06	3.5e-08	9.41e-07	1.07e-05	0	2.14e-07	2.14e-05	0	1.54e-05	8.88e-06
Colwellia sp. Arc7-D	3.57e-06	6.96e-06	3.41e-05	2.22e-07	1.35e-05	5.15e-07	9.1e-07	4.71e-07	7.44e-06	5.84e-07	7.49e-07	2.14e-05	2.42e-07	7.81e-07	3.86e-07
Colwellia sp. M166	3.97e-06	0	0	2.88e-06	2.33e-06	2.06e-06	0	0	1.55e-07	0	4.28e-07	3.21e-05	3.81e-06	1.89e-06	2.57e-07
Colwellia sp. MT41	2.78e-06	1.74e-06	5.7e-06	2.88e-06	9e-06	1.85e-06	2.8e-07	2.2e-06	2.29e-05	1.17e-06	6.42e-07	3.07e-05	3.15e-06	1.41e-05	4.89e-06
Colwellia sp. PAMC 20917	3.57e-06	7.84e-06	7.47e-06	4.43e-07	1.59e-05	3.09e-06	1.92e-06	3.14e-07	1.3e-05	1.95e-07	0	2.8e-05	6.66e-06	6.31e-06	3.86e-07
Colwellia sp. PAMC 21821	1.31e-05	4.35e-06	0	2.22e-07	6.29e-08	1.23e-06	0	0	1.55e-07	0	1.82e-06	2.14e-05	3.63e-07	3.9e-07	1.93e-07
Comamonas antarctica	8.37e-05	0.000437039	1.53e-06	2.03e-05	3.78e-07	0.000186366	1.12e-06	2.35e-06	0	1.46e-07	0.000101676	0.000269783	2.28e-05	1.43e-06	3.59e-05
Comamonas aquatica	0.000294806	0.00117618	4.1e-06	4.7e-05	6.92e-07	0.000502499	4.65e-06	3.58e-05	1.86e-06	1.46e-06	1.1e-05	0.00038197	4.06e-05	2.6e-06	5.62e-05
Comamonas flocculans	6.19e-05	0.000232449	8.33e-06	5.1e-06	6.29e-08	1.22e-05	2.66e-06	3.14e-07	1.55e-07	1.61e-06	1.18e-06	0.000190985	8.96e-06	1.3e-07	1.78e-05
Comamonas fluminis	0.000192041	0.000601582	0	0.000241293	6.29e-08	7.29e-05	2.06e-06	4.55e-06	9.3e-07	1.75e-06	1.16e-05	0.000223039	2.25e-05	5.4e-06	2.08e-05
Comamonas kerstersii	0.000173789	0.000632053	3.92e-06	3.83e-05	0	0.000309856	3.11e-06	3.12e-05	4.65e-07	9.73e-08	1.07e-05	0.000145576	1.32e-05	4.24e-05	1.85e-05
Comamonas koreensis	1.67e-05	2.26e-05	0	3.66e-06	0	5.45e-06	3.5e-08	1.1e-06	0	4.86e-08	3.64e-06	2.27e-05	6.24e-06	9.11e-07	1.74e-06
Comamonas odontotermitis	0.00014284	0.000475346	5.33e-06	1.86e-05	6.29e-08	3.31e-05	1.08e-06	3.45e-06	3.72e-06	4.38e-07	6.31e-06	0.000166945	1.53e-05	8.98e-06	2.04e-05
Comamonas piscis	0.000134508	0.000547605	5.15e-06	3.09e-05	6.29e-08	5.07e-05	1.96e-06	5.02e-06	3.1e-07	4.86e-08	0.000140741	0.000200334	1.09e-05	3.64e-06	2.47e-05
Comamonas serinivorans	0.000108717	0.000486663	6.43e-06	1.4e-05	0	1.93e-05	2.8e-06	1.25e-06	1.09e-06	1.36e-06	2.89e-06	0.000252421	2.2e-05	2.6e-07	2.97e-05
Comamonas sp. B21-038	0.000115066	0.000444875	1.04e-06	1.52e-05	0	3.63e-05	1.19e-06	3.29e-06	9.3e-07	5.35e-07	2.64e-05	0.000157596	2.06e-05	1.82e-06	1.6e-05
Comamonas sp. C11	1.83e-05	1.48e-05	0	8.53e-06	8.18e-07	2.06e-06	0	0	0	0	2.14e-07	1.2e-05	6.05e-08	0	1.35e-06
Comamonas sp. NLF-1-9	6.98e-05	0.000246379	6.13e-08	4.32e-06	0	1.36e-05	2.45e-07	1.57e-07	1.55e-07	0	1.71e-06	0.000181636	3.45e-06	6.51e-08	1.3e-05
Comamonas sp. PR12	1.35e-05	5.22e-05	0	1.22e-06	0	2.57e-06	0	0	1.55e-07	5.35e-07	3.53e-06	2.4e-05	8.48e-07	0	2.25e-06
Comamonas sp. Y33R10-2	0.000228941	0.0006573	1.23e-07	0.000535764	0	0.000126474	4.55e-07	1.15e-05	1.55e-07	3.41e-07	1.65e-05	0.000271119	8.05e-06	4.68e-06	2.4e-05
Comamonas sp. ZM22	9.84e-05	0.000338662	3.19e-06	0.000143026	1.26e-07	4.17e-05	9.1e-07	2.98e-06	3.1e-07	6.32e-07	1.01e-05	0.000182972	2.72e-06	3.25e-07	2.36e-05
Comamonas terrigena	0.000147205	0.000571982	4.9e-07	3.6e-05	8.43e-06	9.75e-05	9.8e-07	6.43e-06	0	6.32e-07	6.64e-06	0.000200334	1.79e-05	3.12e-06	2.84e-05
Comamonas testosteroni	0.000180137	0.000649465	3.68e-07	0.000276413	0	0.000108362	1.08e-06	1.91e-05	2.79e-06	1.56e-06	2.47e-05	0.000324541	1.48e-05	9.04e-06	2.81e-05
Comamonas thiooxydans	0.000122208	0.000334309	2.12e-05	0.000175043	0	5.72e-05	1.71e-06	5.02e-06	1.09e-06	3.79e-06	1.18e-05	0.000228381	9.2e-06	2.6e-06	2.32e-05
Companilactobacillus ginsenosidimutans	7.94e-07	3.48e-06	6.13e-08	0	0	8.23e-07	2.8e-07	0	0	0	0	4.01e-06	0	0	5.92e-06
Conchiformibius steedae	3.17e-06	1.31e-05	1.23e-07	3.32e-07	0	2.06e-06	3.15e-07	7.84e-07	1.4e-06	0	9.63e-07	3.47e-05	3.63e-07	7.81e-07	1.93e-07
Conexibacter sp. DBS9H8	3.17e-06	2.44e-05	0	6.65e-07	6.29e-08	4.12e-07	0	3.14e-07	3.1e-07	4.86e-08	0	0.000162938	3.63e-07	6.51e-08	1.29e-06
Conexibacter sp. S30A1	9.92e-06	1.39e-05	0	2.22e-07	0	7.2e-07	0	0	0	0	0	0.00018965	4.6e-06	2.6e-07	2.06e-06
Conexibacter sp. SYSU D00693	2.26e-05	5.14e-05	0	1.66e-06	0	1.23e-06	3.15e-07	1.57e-07	4.65e-07	0	2.14e-07	0.000340568	1.57e-06	0	5.4e-06
Conexibacter woesei	2.54e-05	3.57e-05	2.45e-07	2.44e-06	5.6e-06	1.03e-06	3.5e-08	0	1.55e-07	4.86e-08	1.07e-07	0.000444742	8.6e-06	6.51e-08	4.89e-06
Congregibacter litoralis	1.59e-06	4.61e-05	0	0	0	7.2e-07	2.1e-07	1.57e-07	4.65e-07	0	1.35e-05	6.28e-05	4.24e-07	7.81e-07	7.08e-07
Constantimarinum furrinae	5.16e-06	0.000104472	6.13e-08	0	0	4.12e-07	0	0	0	0	2.14e-07	1.6e-05	4.24e-07	8.65e-06	4.5e-07
Coprobacter fastidiosus	5.55e-06	1.74e-05	4.05e-05	0	0	1.03e-07	0	0	0	0	2.14e-07	2.67e-05	0	1.3e-07	5.15e-07
Coprococcus comes	1.59e-06	8.71e-07	0	2.22e-07	0	0	0	0	1.55e-07	0	0	1.6e-05	6.05e-08	0	1.09e-05
Coprococcus sp. ART55/1	3.97e-07	0	0	1.11e-07	0	0	0	0	0	0	0	6.68e-06	1.21e-07	0	1.08e-05
Coraliomargarita akajimensis	1.98e-06	5.14e-05	0	6.65e-07	1.26e-07	5.25e-06	1.05e-07	1.57e-07	0	0	1.07e-07	6.01e-05	1.15e-06	0	1.74e-06
Corallococcus coralloides	1.98e-05	5.14e-05	1.19e-05	1.11e-07	0	6.17e-07	5.35e-06	1.57e-07	1.55e-07	0	2.14e-07	0.000281803	3.57e-06	3.25e-07	2.19e-06
Corallococcus macrosporus	8.73e-06	1.22e-05	9.19e-07	7.76e-07	1.62e-05	1.34e-06	3.5e-07	0	0	9.73e-08	7.49e-07	0.000212354	2.06e-06	0	1.67e-06
Corallococcus sp. EGB	1.35e-05	2e-05	0	7.76e-07	6.29e-08	1.03e-06	1.4e-07	0	0	3.45e-06	3.21e-07	0.000240401	6.66e-07	1.3e-07	9.65e-07
Corallococcus sp. NCRR	8.73e-06	1.13e-05	0	3.32e-07	0	4.12e-07	1.75e-07	2.04e-06	0	0	0	0.0001202	2.06e-06	0	1.03e-06
Corynebacterium accolens	9.52e-06	2.87e-05	0	4.43e-07	6.29e-08	2.88e-06	3.5e-08	0	0	4.86e-08	0	5.88e-05	1.63e-06	3.25e-07	2.9e-06
Corynebacterium ammoniagenes	7.14e-06	3.57e-05	0	1.11e-07	0	1.75e-06	3.5e-07	0	0	0	0	1.07e-05	1.21e-07	0	7.08e-07
Corynebacterium amycolatum	6.35e-06	3.4e-05	6e-06	4.43e-07	0	1.54e-06	2.59e-06	1.57e-07	9.3e-07	0	0	2.67e-05	5.45e-07	1.69e-06	1.93e-07
Corynebacterium aquatimens	1.35e-05	1.92e-05	0	6.65e-07	0	4.73e-06	1.4e-07	0	0	0	0	1.74e-05	3.03e-07	0	0
Corynebacterium argentoratense	1.27e-05	1.31e-05	0	6.65e-07	1.47e-05	3.19e-06	0	0	0	0	0	1.87e-05	2.42e-07	6.57e-06	1.29e-07
Corynebacterium aurimucosum	7.94e-06	2.52e-05	0	3.32e-07	0	9.26e-07	1.4e-07	2.51e-06	0	4.86e-08	0	2.14e-05	3.63e-07	0	6.43e-07
Corynebacterium auriscanis	4.01e-05	3.92e-05	0	1.11e-07	0	3.29e-06	1.75e-07	0	0	4.86e-08	1.07e-07	9.35e-06	2.42e-07	6.51e-08	2.57e-07
Corynebacterium bovis	3.17e-06	6.09e-06	0	1.11e-07	0	4.12e-07	0	1.57e-07	0	0	1.07e-07	5.34e-05	2.3e-06	0	1.03e-06
Corynebacterium callunae	1.27e-05	1.83e-05	0	4.43e-07	0	2.98e-06	3.5e-08	1.57e-07	3.1e-07	0	3.21e-07	5.34e-06	2.42e-07	6.51e-08	9.65e-07
Corynebacterium canis	2.78e-06	1.48e-05	0	1.11e-07	0	8.23e-07	7.7e-07	0	1.55e-07	0	2.14e-07	4.01e-05	3.27e-06	1.3e-07	1.29e-07
Corynebacterium casei	4.76e-06	4.79e-05	0	3.32e-07	0	1.96e-06	3.85e-07	0	0	0	0	2e-05	2.97e-06	0	1.15e-05
Corynebacterium caspium	1.59e-06	1.22e-05	0	0	0	2.57e-06	3.5e-08	0	1.55e-07	0	0	6.68e-06	1.21e-07	1.61e-05	0
Corynebacterium coyleae	3.17e-06	6.09e-06	1.23e-07	1.11e-07	0	1.03e-06	0	1.57e-07	0	1.46e-07	2.57e-06	1.87e-05	3.27e-06	0	3.22e-07
Corynebacterium cyclohexanicum	7.14e-06	2.35e-05	0	8.86e-07	0	1.13e-06	4.9e-07	0	0	0	1.07e-07	7.61e-05	6.66e-07	5.86e-07	1.09e-06
Corynebacterium deserti	5.16e-06	5.57e-05	0	1.11e-07	0	1.44e-06	7e-08	0	0	0	0	1.74e-05	1.82e-07	0	1.29e-07
Corynebacterium diphtheriae	8.73e-06	3.83e-05	0	2.22e-07	0	3.09e-06	7e-08	0	1.55e-07	9.73e-08	5.35e-07	2.27e-05	6.05e-08	0	1.93e-07
Corynebacterium doosanense	4.76e-06	2.09e-05	0	6.65e-07	0	6.17e-07	3.5e-08	0	3.1e-07	9.73e-08	0	4.94e-05	1.82e-07	1.3e-07	1.8e-06
Corynebacterium durum	1.51e-05	5.22e-06	0	4.54e-06	0	1.13e-06	1.75e-07	0	0	0	0	2.54e-05	2.42e-07	1.95e-07	0
Corynebacterium efficiens	1.59e-06	1.31e-05	1.65e-06	1.55e-06	0	1.23e-06	1.33e-06	0	0	9.73e-08	2.14e-07	3.07e-05	3.03e-07	0	1.03e-06
Corynebacterium endometrii	9.13e-06	6.09e-06	0	1.11e-07	0	1.34e-06	1.4e-07	2.82e-06	1.09e-06	1.46e-07	3.21e-07	4.01e-05	1.82e-07	0	1.29e-07
Corynebacterium faecale	6.35e-06	1.74e-05	0	2.22e-07	0	5.15e-06	5.95e-07	0	1.55e-07	1.56e-06	0	2.54e-05	6.05e-08	0	3.22e-07
Corynebacterium falsenii	1.43e-05	2.18e-05	0	3.32e-07	0	1.34e-06	1.4e-07	1.57e-07	0	2.97e-06	6.42e-07	3.47e-05	1.57e-06	0	6.43e-08
Corynebacterium felinum	1.19e-05	5.22e-05	0	0	0	4.32e-06	2.8e-07	0	0	0	0	6.68e-06	6.05e-08	0	1.29e-07
Corynebacterium flavescens	3.97e-07	5.05e-05	0	0	0	1.54e-06	0	0	0	4.86e-08	0	3.74e-05	2.42e-07	0	1.29e-07
Corynebacterium frankenforstense	2.78e-06	4.35e-06	0	1.44e-06	0	9.26e-07	0	0	0	9.73e-08	0	6.41e-05	4.84e-07	5.21e-07	1.29e-06
Corynebacterium freneyi	3.57e-06	1.48e-05	0	3.32e-07	8.81e-07	2.06e-07	7e-08	1.29e-05	0	0	0	3.21e-05	1.21e-07	0	6.43e-07
Corynebacterium glaucum	3.17e-06	2.7e-05	0	1.11e-07	0	8.23e-07	3.5e-08	0	0	0	0	3.74e-05	2.78e-06	6.51e-08	4.5e-07
Corynebacterium glutamicum	3.97e-07	3.13e-05	0	3.32e-07	6.29e-08	6.59e-06	7e-08	0	6.2e-07	4.86e-07	3.21e-07	1.47e-05	1.82e-07	2.67e-06	1.93e-07
Corynebacterium guangdongense	5.16e-06	1.65e-05	0	1.33e-06	0	1.65e-06	7e-08	0	0	1.46e-07	0	6.01e-05	1.57e-06	0	8.36e-07
Corynebacterium halotolerans	4.76e-06	2.35e-05	6.13e-08	1.11e-07	0	1.03e-06	0	4.71e-07	0	4.86e-08	0	5.74e-05	3.03e-07	3.9e-06	1.03e-06
Corynebacterium hindlerae	1.15e-05	5.48e-05	0	2.22e-07	0	5.25e-06	3.85e-07	1.57e-07	0	9.73e-08	1.07e-07	2.4e-05	0	1.04e-06	1.93e-07
Corynebacterium imitans	5.95e-06	3.22e-05	2.45e-07	1.11e-07	0	6.17e-07	4.9e-07	0	0	0	3.64e-06	2.94e-05	1.21e-07	0	1.29e-07
Corynebacterium jeikeium	7.54e-06	4.96e-05	0	2.22e-07	0	7.2e-07	3.15e-07	0	0	4.86e-08	5.35e-07	3.61e-05	1.21e-07	0	1.93e-07
Corynebacterium kefirresidentii	1.59e-06	0	0	4.43e-06	0	1.03e-07	0	7.84e-06	0	0	0	1.2e-05	0	0	0
Corynebacterium kroppenstedtii	6.35e-06	3.13e-05	0	7.76e-07	0	5.45e-06	0	0	4.65e-07	0	2.14e-07	3.47e-05	1.21e-07	0	4.5e-07
Corynebacterium lactis	1.27e-05	5.22e-06	0	1.88e-06	0	1.44e-06	1.05e-07	0	0	1.26e-06	1.07e-07	1.34e-05	3.63e-07	0	4.5e-07
Corynebacterium lizhenjunii	6.75e-06	2.35e-05	0	0	0	1.34e-06	4.55e-07	0	0	4.86e-08	0	2.54e-05	2.42e-07	0	5.79e-07
Corynebacterium marinum	3.97e-06	5.22e-06	1.16e-05	4.43e-07	0	9.26e-07	3.18e-06	1.57e-07	1.55e-07	0	0	3.21e-05	6.05e-08	0	6.43e-07
Corynebacterium maris	1.19e-06	1.83e-05	0	1.11e-07	6.29e-08	2.37e-06	4.9e-07	0	1.55e-07	0	0	3.21e-05	2.42e-07	1.3e-07	8.36e-07
Corynebacterium massiliense	2.38e-06	4.79e-05	0	0	0	5.56e-06	0	1.57e-07	0	0	1.07e-07	1.6e-05	7.26e-07	0	2.57e-07
Corynebacterium matruchotii	3.97e-07	1.92e-05	0	0	6.29e-08	7.2e-07	0	0	0	0	0	4.81e-05	3.03e-07	2.03e-05	8.36e-07
Corynebacterium propinquum	9.52e-06	2e-05	0	1.11e-07	0	1.96e-06	3.15e-07	7.06e-06	0	0	1.07e-07	1.87e-05	3.03e-07	6.51e-08	6.43e-08
Corynebacterium provencense	7.94e-07	7.84e-06	0	2.22e-07	0	5.15e-07	0	0	0	0	0	4.54e-05	2.24e-06	0	9.01e-07
Corynebacterium pseudodiphtheriticum	1.23e-05	2.61e-05	1.11e-05	3.32e-07	3.78e-07	3.4e-06	3.85e-07	1.57e-07	1.55e-07	0	0	2.27e-05	3.03e-07	0	1.29e-07
Corynebacterium pseudopelargi	3.97e-07	2.18e-05	0	0	0	8.34e-06	0	0	0	0	0	1.47e-05	6.05e-08	0	6.43e-08
Corynebacterium pseudotuberculosis	3.17e-06	4.7e-05	0	1.11e-07	0	1.34e-06	1.75e-07	0	0	0	0	1.87e-05	6.05e-07	0	3.22e-07
Corynebacterium riegelii	6.35e-06	2.52e-05	0	2.22e-07	0	1.03e-06	7e-08	3.14e-07	2.33e-06	9.73e-08	1.07e-07	3.74e-05	3.63e-07	2.6e-07	3.86e-07
Corynebacterium rouxii	1.19e-06	6.96e-06	0	2.22e-07	0	1.03e-07	0	0	0	0	8.88e-06	5.34e-06	6.05e-08	0	1.29e-07
Corynebacterium silvaticum	8.33e-06	2.61e-06	0	1.11e-07	0	3.09e-07	3.15e-07	0	0	0	0	6.68e-06	1.82e-07	1.33e-05	0
Corynebacterium sp. LM112	1.94e-05	1.57e-05	0	2.22e-07	0	5.15e-07	1.75e-07	0	1.55e-07	0	0	2e-05	2.42e-07	0	4.5e-07
Corynebacterium sp. R4	1.07e-05	2.79e-05	0	0	0	8.34e-06	0	0	0	4.86e-08	0	1.2e-05	3.63e-07	0	1.93e-07
Corynebacterium sphenisci	5.95e-06	8.71e-06	6.8e-06	5.54e-07	0	5.15e-07	2.69e-06	0	0	4.86e-08	1.07e-07	7.48e-05	6.05e-08	1.17e-06	8.36e-07
Corynebacterium stationis	1.31e-05	6.27e-05	6.13e-08	3.66e-06	0	6.07e-06	4.9e-07	0	0	0	0	2.8e-05	1.82e-07	0	1.93e-07
Corynebacterium striatum	9.92e-06	1.74e-05	0	4.43e-07	0	2.06e-06	3.5e-07	0	0	0	0	2.54e-05	1.82e-07	9.82e-06	4.5e-07
Corynebacterium terpenotabidum	2.78e-06	1.65e-05	6.13e-08	0	0	4.12e-07	7.7e-07	1.57e-07	6.2e-07	0	1.07e-07	5.08e-05	6.05e-08	6.51e-08	8.36e-07
Corynebacterium tuberculostearicum	1.07e-05	6.18e-05	0	2.22e-07	0	6.79e-06	1.4e-07	1.1e-06	3.1e-07	4.86e-08	3.21e-07	0.000106845	4.36e-06	7.16e-07	1.22e-06
Corynebacterium urogenitale	1.31e-05	8.71e-06	0	0	0	3.29e-06	0	0	0	0	0	2e-05	3.63e-07	0	4.5e-07
Corynebacterium uterequi	4.36e-06	1.22e-05	0	2.77e-06	0	5.15e-07	1.4e-07	0	0	4.86e-08	4.28e-07	4.41e-05	1.21e-07	0	4.5e-07
Corynebacterium variabile	2.38e-06	2.44e-05	0	6.65e-07	0	1.54e-06	3.15e-07	0	0	0	2.14e-07	2.94e-05	2.42e-07	6.51e-08	6.43e-07
Corynebacterium vitaeruminis	4.76e-06	6.96e-05	6.62e-06	4.43e-07	0	1.34e-06	7.7e-07	0	0	0	0	3.74e-05	1.09e-06	0	5.79e-07
Corynebacterium xerosis	1.98e-06	1.92e-05	0	1.11e-07	0	2.06e-07	0	0	0	1.95e-07	2.14e-07	5.88e-05	2.72e-06	0	1.61e-06
Costertonia aggregata	1.71e-05	9.23e-05	6.13e-08	3.32e-07	0	1.03e-06	0	0	2.48e-06	0	1.07e-07	2.67e-05	4.24e-07	6.51e-08	3.22e-07
Couchioplanes caeruleus	2.1e-05	3.83e-05	0	1.55e-06	3.08e-06	1.13e-06	1.75e-07	4.71e-07	4.65e-07	5.84e-07	7.49e-07	0.000203005	1.06e-05	0	3.35e-06
Coxiella burnetii	7.94e-06	7.84e-06	0	0	3.15e-07	8.23e-07	2.8e-07	0	9.3e-07	0	0	9.08e-05	3.63e-07	2.15e-06	3.22e-07
Coxiella-like endosymbiont	3.57e-06	3.74e-05	9.68e-06	2.22e-07	1.26e-07	2.06e-07	1.05e-07	4.71e-07	0	4.86e-08	4.28e-07	0.000116194	3.63e-07	3.9e-07	6.18e-06
Crassaminicella profunda	2.38e-06	3.05e-05	1.94e-05	1.11e-07	4.41e-07	2.06e-07	1.4e-07	0	1.4e-06	0	1.07e-07	2e-05	4.24e-07	0	1.93e-07
Crateriforma conspicua	3.17e-06	5.22e-06	0	1.11e-07	6.29e-08	1.03e-07	3.5e-08	0	0	0	1.07e-07	9.62e-05	5.45e-07	2.6e-07	5.15e-07
Crenobacter cavernae	2.38e-05	4.44e-05	0	1.99e-06	6.29e-08	1.23e-06	7.35e-07	1.41e-06	4.65e-07	9.73e-07	6.42e-07	0.000223039	1.85e-05	5.86e-07	4.95e-06
Crinalium epipsammum	1.98e-06	9.84e-05	0	0	0	1.03e-07	0	0	1.55e-07	4.86e-08	2.14e-07	4.54e-05	2.06e-06	0	2.57e-07
Croceibacter atlanticus	5.12e-05	6.36e-05	0	2.22e-07	0	2.47e-06	0	1.57e-07	3.1e-06	0	3.21e-07	2.14e-05	2.3e-06	5.4e-06	1.22e-06
Croceibacterium atlanticum	1.51e-05	0.000252473	3.12e-06	1.11e-06	0	6.17e-07	1.4e-07	0	3.1e-07	5.84e-07	3.21e-07	9.22e-05	6.05e-07	0	2.06e-06
Croceibacterium sp. D39	0.000101575	9.92e-05	6.13e-08	1.44e-06	0	8.23e-07	1.75e-07	3.14e-07	1.55e-07	5.35e-07	4.28e-07	0.000134892	9.69e-07	6.51e-08	4.63e-06
Croceicoccus marinus	7.42e-05	0.000178472	0	9.97e-07	0	9.26e-07	7e-08	3.14e-07	1.55e-07	2.43e-07	3.21e-07	0.000161603	8.9e-06	1.3e-07	4.12e-06
Croceicoccus naphthovorans	3.49e-05	5.75e-05	1.23e-06	7.76e-07	0	1.23e-06	2.45e-07	0	0	9.73e-08	1.07e-06	0.00010818	6.66e-07	0	4.25e-06
Croceicoccus sp. Ery15	8.33e-06	7.84e-06	6.13e-08	2.22e-07	0	3.09e-07	3.5e-08	0	0	0	0	6.81e-05	3.03e-06	0	1.74e-06
Croceicoccus sp. Ery5	9.52e-06	5.57e-05	0	3.32e-07	0	6.17e-07	3.5e-07	0	0	0	1.07e-07	5.74e-05	1.21e-07	6.51e-08	8.36e-07
Croceicoccus sp. YJ47	3.61e-05	0.000157578	0	5.54e-07	6.29e-08	3.09e-07	5.6e-07	1.57e-06	0	0	8.56e-07	0.000128214	6.42e-06	6.51e-08	1.67e-06
Cronobacter condimenti	2.58e-05	9.58e-06	6e-06	6.61e-05	1.45e-06	5.41e-05	2.55e-06	2.23e-05	2.65e-05	2.07e-05	0.00010007	4.27e-05	2.28e-05	0.000165787	5.6e-06
Cronobacter dublinensis	1.51e-05	6.96e-06	3.68e-07	0.000111008	2.14e-06	7.14e-05	2.13e-06	3.81e-05	6.31e-05	2.45e-05	0.000138172	5.61e-05	2.51e-05	0.000133059	6.82e-06
Cronobacter malonaticus	6.35e-06	8.71e-07	1.23e-07	1.04e-05	1.26e-07	1.65e-05	7.7e-07	1.05e-05	7.29e-06	1.18e-05	4.68e-05	1.2e-05	1.17e-05	4.5e-05	2.57e-07
Cronobacter muytjensii	3.17e-06	8.71e-07	0	1.42e-05	0	9.16e-06	4.16e-06	1.04e-05	2.17e-06	6.03e-06	1.67e-05	2.67e-06	5.45e-07	1.96e-05	6.43e-08
Cronobacter sakazakii	3.25e-05	4.79e-05	1.84e-07	0.000115107	5.73e-06	7.23e-05	5.42e-06	6.27e-05	4.05e-05	3.7e-05	0.000177772	8.95e-05	5.81e-05	0.000207429	4.38e-06
Cronobacter sp. JZ38	3.97e-06	0	0	6.2e-06	0	6.07e-06	3.85e-07	2.35e-06	3.1e-06	1.99e-06	1.35e-05	5.34e-06	1.76e-06	2.86e-05	6.43e-08
Cronobacter universalis	6.75e-06	0	0	4.23e-05	2.64e-06	1.91e-05	6.3e-07	1.55e-05	2.57e-05	1.56e-05	6.91e-05	2.4e-05	1.22e-05	3.89e-05	3.22e-07
Crossiella sp. CA-258035	3.61e-05	3.92e-05	5.45e-06	8.31e-06	0	3.81e-06	4.55e-07	1.57e-07	4.65e-07	2.92e-07	1.82e-06	0.000174958	5.57e-06	1.3e-06	2.38e-06
Cruoricaptor ignavus	1.59e-06	6.09e-06	0	2.22e-07	0	0	2.59e-06	0	0	0	0	2.67e-05	2.42e-07	3.9e-07	5.79e-07
Cryobacterium arcticum	2.1e-05	8.71e-06	0	6.65e-07	0	1.75e-06	0	0	1.55e-07	1.46e-07	0	2.8e-05	1.82e-07	5.86e-07	1.09e-06
Cryobacterium breve	6.07e-05	6.88e-05	6.13e-08	2.44e-06	6.29e-08	3.4e-06	1.05e-07	0	0	0	0	5.21e-05	1.03e-06	0	2.9e-06
Cryobacterium soli	1.03e-05	4.18e-05	0	9.97e-07	0	2.57e-06	0	0	6.2e-07	4.86e-08	0	4.01e-05	1.82e-07	0	2.44e-06
Cryobacterium sp. LW097	1.27e-05	6.62e-05	0	1.88e-06	0	7.2e-06	1.4e-07	0	0	0	1.39e-06	5.88e-05	8.48e-07	0	2.19e-06
Cryobacterium sp. PAMC25264	5.95e-06	3.13e-05	0	2.22e-07	0	4.12e-06	7e-08	1.57e-07	0	0	0	2.94e-05	4.24e-07	6.51e-08	1.35e-06
Cryobacterium sp. SO1	1.47e-05	3.22e-05	1.84e-07	1.11e-07	0	3.19e-06	3.5e-08	0	0	5.84e-07	4.28e-07	4.01e-05	2.06e-06	6.51e-08	2.38e-06
Cryobacterium sp. SO2	2.86e-05	5.14e-05	0	1.22e-06	0	3.6e-06	1.29e-06	0	1.55e-07	0	6.42e-07	4.81e-05	6.05e-07	0	1.35e-06
Cupidesulfovibrio liaohensis	6.35e-06	2.18e-05	1.41e-06	3.32e-07	0	8.23e-07	7e-08	3.14e-07	0	9.73e-08	4.28e-07	0.000204341	7.87e-07	8.39e-06	1.54e-06
Cupriavidus basilensis	8.25e-05	0.000222873	2.88e-06	1.25e-05	1.26e-07	1.3e-05	2.17e-06	3.76e-06	7.75e-07	1.51e-06	8.24e-06	0.000522204	5.45e-05	3.01e-05	2.43e-05
Cupriavidus campinensis	4.4e-05	9.84e-05	2.02e-06	4.65e-06	0	1.07e-05	1.33e-06	6.27e-07	4.03e-06	5.84e-07	4.28e-06	0.000320535	4.26e-05	3.9e-07	2.11e-05
Cupriavidus cauae	2.74e-05	6.79e-05	6.74e-07	2.33e-06	2.33e-06	2.88e-06	5.95e-07	3.14e-07	9.3e-07	1.07e-06	1.28e-06	0.000157596	2.37e-05	3.51e-06	9.33e-06
Cupriavidus gilardii	2.62e-05	6.09e-05	1.84e-07	2.1e-06	1.26e-07	8.54e-06	7.35e-07	4.71e-07	1.55e-06	5.35e-07	4.17e-06	0.000243072	3.72e-05	1.82e-06	1.04e-05
Cupriavidus metallidurans	4.8e-05	0.000183696	1.05e-05	1.14e-05	1.38e-06	1.22e-05	1.19e-06	2.35e-06	2.33e-06	1.61e-06	5.78e-06	0.00130217	4.58e-05	4.16e-06	1.94e-05
Cupriavidus nantongensis	6.35e-06	3.31e-05	0	2.33e-06	0	1.23e-06	0	6.27e-07	0	1.22e-06	9.63e-07	6.14e-05	4.42e-06	1.95e-07	5.08e-06
Cupriavidus necator	5.28e-05	0.000155837	6.19e-06	1.42e-05	1.26e-07	1.11e-05	3.04e-06	4.08e-06	2.06e-05	1.57e-05	7.28e-06	0.000379299	6.5e-05	2.99e-05	1.83e-05
Cupriavidus neocaledonicus	7.14e-06	1.31e-05	0	1.77e-06	0	2.26e-06	1.4e-07	2.04e-06	1.55e-07	4.38e-07	2.46e-06	6.41e-05	5.15e-06	0	2.38e-06
Cupriavidus oxalaticus	3.65e-05	6.09e-05	6.13e-06	6.65e-06	4.41e-06	7e-06	1.26e-06	9.41e-07	1.71e-06	5.35e-07	4.6e-06	0.00030985	8.03e-05	3.12e-06	1.09e-05
Cupriavidus pauculus	8.13e-05	0.000293391	1.65e-06	9.75e-06	4.03e-06	1.77e-05	2.62e-06	5.49e-06	1.4e-06	5.93e-06	5.99e-06	0.000698498	0.000131127	2.26e-05	3.36e-05
Cupriavidus pinatubonensis	4.21e-05	8.18e-05	6.13e-08	2.44e-06	1.26e-07	5.56e-06	7e-07	2.35e-06	9.3e-07	7.3e-07	1.71e-06	0.000212354	1.91e-05	1.76e-06	1e-05
Cupriavidus sp. EM10	2.34e-05	8.27e-05	3.06e-07	2.1e-06	0	2.47e-06	7e-07	9.41e-07	4.65e-07	1.17e-06	1.21e-05	0.000174958	2.83e-05	1.61e-05	6.05e-06
Cupriavidus sp. KK10	4.36e-06	1.22e-05	0	1.22e-06	0	7.2e-07	2.8e-07	0	0	5.84e-07	4.28e-07	2.8e-05	3.57e-06	1.5e-06	1.29e-06
Cupriavidus sp. MP-37	1.11e-05	2.61e-05	0	1.11e-06	0	4.84e-06	8.75e-07	0	0	9.73e-08	8.56e-07	7.08e-05	9.5e-06	3.25e-07	1.87e-06
Cupriavidus sp. P-10	1.9e-05	8.44e-05	6.13e-08	3.66e-06	6.29e-08	2.88e-06	2.8e-07	7.84e-07	4.65e-07	1.12e-06	9.63e-07	0.000134892	1.62e-05	3.19e-06	5.66e-06
Cupriavidus sp. USMAA2-4	2.78e-06	6.09e-06	6.13e-08	6.65e-07	6.29e-08	1.54e-06	9.8e-07	4.71e-07	0	9.73e-08	1.18e-06	3.07e-05	9.08e-07	0	1.8e-06
Cupriavidus sp. WKF15	2.1e-05	0.000100119	4.94e-05	4.54e-06	2.52e-07	5.45e-06	2.45e-07	6.27e-07	1.09e-06	3.41e-07	4.5e-06	0.000192321	2.51e-05	7.94e-06	7.27e-06
Cupriavidus taiwanensis	0.000116256	0.000424851	1.9e-06	1.44e-05	0	2.23e-05	2.17e-06	2.51e-06	6.82e-06	3.26e-06	1.24e-05	0.000765276	8.44e-05	2.18e-05	3.2e-05
Curtobacterium flaccumfaciens	1.86e-05	3.05e-05	2.94e-06	1.45e-05	0	2.06e-06	7e-07	1.57e-07	0	4.86e-08	0	7.61e-05	3.21e-06	1.3e-07	2.12e-06
Curtobacterium sp. 24E2	2.94e-05	7.84e-06	0	4.43e-07	0	3.09e-07	1.4e-07	0	0	0	0	2.54e-05	3.03e-07	0	2.57e-07
Curtobacterium sp. 458	1.15e-05	2.18e-05	0	7.76e-07	0	9.26e-07	3.5e-08	0	0	0	0	4.67e-05	1.51e-06	6.51e-08	1.09e-06
Curtobacterium sp. 9128	6.35e-06	3.83e-05	6.13e-08	1.55e-06	0	1.65e-06	3.5e-08	0	0	9.73e-08	1.07e-07	4.67e-05	1.21e-06	0	1.22e-06
Curtobacterium sp. BH-2-1-1	1.23e-05	5.22e-06	0	7.76e-07	0	7.2e-07	0	0	0	0	0	4.41e-05	6.05e-07	0	1.29e-06
Curtobacterium sp. DN_7.5	4.36e-06	2.7e-05	1.84e-07	1.22e-06	0	8.23e-07	4.55e-07	0	3.1e-07	3.41e-07	3.21e-07	4.81e-05	1.21e-06	0	4.5e-07
Curtobacterium sp. L6-1	5.16e-06	1.13e-05	0	7.76e-07	0	0	0	0	0	4.86e-08	0	6.54e-05	7.26e-07	0	1.16e-06
Curtobacterium sp. MCLR17_007	2.3e-05	1.31e-05	0	2.44e-06	0	4.12e-07	1.05e-07	1.57e-07	4.65e-07	0	0	7.08e-05	3.15e-06	0	9.01e-07
Curtobacterium sp. MCLR17_032	1.23e-05	3.4e-05	6.13e-08	1.94e-05	0	7.2e-07	3.5e-08	0	0	0	0	5.48e-05	1.82e-07	0	9.01e-07
Curtobacterium sp. MCLR17_036	6.35e-06	2.26e-05	0	6.65e-07	0	3.6e-06	0	3.14e-07	0	0	0	4.54e-05	1.82e-07	0	1.61e-06
Curtobacterium sp. MCPF17_002	1.19e-05	1.39e-05	0	8.86e-07	0	1.34e-06	2.1e-07	1.57e-07	0	9.73e-07	1.39e-06	3.74e-05	5.45e-07	0	1.42e-06
Curtobacterium sp. MCPF17_052	6.35e-06	2e-05	0	9.97e-07	0	1.13e-06	0	0	6.2e-07	0	0	4.41e-05	2.42e-06	1.3e-07	1.74e-06
Curtobacterium sp. MCSS17_015	1.39e-05	1.13e-05	1.23e-07	6.65e-07	0	1.13e-06	3.5e-08	1.57e-07	9.3e-07	4.86e-08	0	2.54e-05	2.42e-07	0	1.42e-06
Curtobacterium sp. MR_MD2014	1.03e-05	9.58e-06	1.72e-06	4.43e-07	0	7.2e-07	7e-07	0	0	0	0	2.8e-05	6.05e-08	6.51e-08	7.08e-07
Curtobacterium sp. TXMA1	7.94e-06	2.61e-05	0	4.43e-07	2.52e-06	4.12e-07	0	0	0	0	0	3.21e-05	1.21e-07	1.3e-07	3.22e-07
Curvibacter sp. AEP1-3	0.000371385	0.00195449	0	9.42e-06	1.26e-07	2.7e-05	0	7.84e-07	1.55e-07	1.46e-07	1.07e-07	0.00155726	2.69e-05	5.01e-06	3.85e-05
Cutibacterium acnes	0.000520573	0.00113526	1.9e-06	1.91e-05	1.13e-06	4.82e-05	8.05e-07	9.57e-06	4.96e-06	8.76e-07	1.82e-06	0.00535694	7.07e-05	2.26e-05	3.18e-05
Cutibacterium avidum	1.15e-05	5.22e-05	0	4.43e-07	0	1.96e-06	3.5e-08	9.41e-07	0	0	1.93e-06	4.54e-05	3.03e-06	2.6e-07	9.01e-07
Cutibacterium granulosum	5.95e-06	1.48e-05	1.1e-06	4.43e-07	0	4.84e-06	3.5e-07	1.57e-07	1.55e-07	4.86e-08	0	4.54e-05	1.09e-06	0	1.74e-06
Cyanobacterium aponinum	6.9e-05	6.62e-05	0	1.33e-06	0	6.17e-07	0	6.27e-07	0	0	0	5.48e-05	4e-06	0	3.22e-07
Cyanobacterium sp. uoEpiScrs1	1.19e-06	0.000152354	0	3.32e-07	0	1.03e-07	0	0	0	0	0	1.74e-05	3.63e-07	0	1.29e-07
Cyanobium gracile	3.97e-06	1.74e-05	0	1.55e-06	0	1.44e-06	0	0	0	0	2.14e-07	9.62e-05	1.22e-05	3.25e-07	7.08e-07
Cyanobium sp. NIES-981	5.16e-06	1.31e-05	5.64e-06	0	0	7.2e-07	2.62e-06	3.14e-07	6.2e-07	1.46e-07	0	6.41e-05	1.09e-06	0	6.11e-06
Cyclobacterium amurskyense	2.06e-05	1.31e-05	0	2.22e-07	0	1.03e-07	7e-08	0	6.2e-07	0	0	3.07e-05	2.42e-07	8.2e-06	3.86e-07
Cyclobacterium marinum	5.95e-06	2.61e-05	6.55e-06	2.22e-07	0	1.03e-06	3.5e-08	0	3.88e-06	0	1.07e-07	2.94e-05	1.03e-06	8.46e-07	1.93e-07
Cyclonatronum proteinivorum	5.55e-06	1.31e-05	0	1.11e-07	0	7.2e-07	7e-08	0	0	0	0	5.08e-05	1.94e-06	4.55e-07	1.93e-07
Cylindrospermum stagnale	2.78e-06	3.48e-05	0	4.43e-07	0	2.06e-07	3.85e-07	0	0	0	3.53e-06	2.27e-05	3.62e-05	0	5.79e-07
Cystobacter fuscus	1.79e-05	2.18e-05	6.74e-07	1.11e-06	0	3.29e-06	5.25e-07	4.71e-07	0	3.89e-07	8.56e-07	0.000452755	4e-06	0	4.12e-06
Cytobacillus firmus	2.38e-06	2.87e-05	3.3e-05	4.43e-07	0	1.13e-06	3.5e-08	6.27e-07	0	0	2.14e-07	2.54e-05	3.63e-07	1.76e-06	3.86e-07
Cytobacillus kochii	1.59e-06	3.48e-06	0	0	0	6.17e-07	2.1e-07	0	4.65e-07	0	3e-06	1.87e-05	3.63e-07	2.28e-06	1.29e-07
Cytobacillus spongiae	4.17e-05	7.84e-06	1.23e-07	0	1.01e-06	1.03e-07	0	1.57e-07	0	0	2.14e-07	1.6e-05	6.05e-08	1.3e-07	6.43e-08
Cytophaga hutchinsonii	3.17e-05	4.44e-05	0	1.77e-06	0	1.75e-06	1.75e-07	5.33e-06	1.55e-07	2.92e-07	1.07e-07	5.08e-05	7.87e-07	5.21e-07	4.38e-06
Dactylosporangium aurantiacum	2.42e-05	5.83e-05	5.82e-06	1.66e-06	0	1.54e-06	2.8e-07	1.57e-07	0	4.33e-06	1.18e-06	0.000305843	5.69e-06	4.55e-07	3.47e-06
Dactylosporangium fulvum	1.19e-05	6.79e-05	2.63e-06	1.55e-06	0	1.85e-06	1.33e-06	0	0	4.86e-08	5.35e-07	0.000181636	5.51e-06	0	2.32e-06
Dactylosporangium matsuzakiense	8.73e-06	9.58e-06	1.1e-06	8.86e-07	2.52e-07	7.2e-07	3.15e-07	0	0	0	0	7.61e-05	4.84e-07	0	8.36e-07
Dactylosporangium roseum	8.73e-06	3.48e-05	6.13e-08	1.11e-06	6.29e-08	9.26e-07	2.1e-07	3.14e-07	3.72e-06	5.35e-07	3.21e-07	0.000130885	3.39e-06	1.3e-07	1.8e-06
Dactylosporangium vinaceum	1.23e-05	1.74e-05	0	2.22e-07	0	2.06e-07	7e-08	6.27e-07	1.4e-06	4.86e-08	1.39e-06	7.88e-05	1.03e-05	0	1.61e-06
Dechloromonas denitrificans	0.0001	0.000184566	1.65e-06	1.87e-05	0	4.8e-05	1.96e-06	2.2e-06	1.24e-06	4.38e-07	1.71e-06	0.000709183	2.66e-05	1.69e-05	8.38e-05
Dechloromonas sp. A34	5.36e-05	8.44e-05	6.74e-06	6.54e-06	2.45e-06	2.26e-05	2.55e-06	1.41e-06	0	1.95e-07	1.82e-06	0.000532889	2.04e-05	2.99e-06	5.12e-05
Dechloromonas sp. HYN0024	4.17e-05	7.4e-05	0	4.54e-06	0	1.58e-05	7e-08	7.84e-06	6.2e-07	4.86e-07	1.07e-07	0.000323206	3.57e-06	3.51e-06	2.49e-05
Dechloromonas sp. TW-R-39-2	2.54e-05	9.49e-05	6.13e-06	3.88e-06	0	1.07e-05	1.4e-07	4.71e-07	1.55e-07	1.95e-07	3.21e-07	0.000150918	1.55e-05	3.9e-07	3.24e-05
Deefgea piscis	2.82e-05	9.66e-05	0	4.43e-06	6.29e-08	4.22e-06	3.85e-07	1.57e-07	4.65e-07	3.26e-06	7.06e-06	0.000160267	2.6e-06	6.15e-05	2.64e-06
Deefgea tanakiae	2.98e-05	7.31e-05	0.00018427	9.97e-07	6.29e-07	3.91e-06	1.15e-06	4.71e-07	2.48e-06	9.73e-08	2.35e-06	0.000117529	9.08e-07	4.26e-05	3.67e-06
Deferribacter desulfuricans	7.94e-07	7.84e-06	4.77e-05	0	0	3.09e-07	0	0	0	4.86e-08	0	2.54e-05	0	0	1.93e-07
Defluviicoccus vanus	7.94e-06	0.000140166	6.13e-08	7.76e-07	0	1.54e-06	0	0	0	4.86e-08	3.42e-06	0.000235059	5.15e-06	1.95e-07	2.06e-06
Deinococcus actinosclerus	2.38e-06	7.84e-06	0	8.86e-07	0	2.16e-06	7e-08	0	1.55e-07	5.84e-07	0	6.81e-05	5.63e-06	0	1.61e-06
Deinococcus aetherius	1.19e-06	4.35e-06	6.13e-08	1.11e-07	0	8.23e-07	3.5e-08	1.57e-07	9.3e-07	0	4.28e-07	0.00010818	3.03e-07	0	2.32e-06
Deinococcus aquaticus	4.36e-06	7.84e-06	0	1.66e-06	0	3.09e-07	1.64e-06	3.14e-07	0	4.86e-08	5.35e-07	6.28e-05	1.09e-06	0	3.13e-05
Deinococcus deserti	1.59e-06	2.35e-05	0	5.54e-07	3.15e-07	5.15e-07	6.65e-07	0	3.1e-07	3.41e-07	1.5e-06	4.67e-05	2.42e-07	0	1.35e-06
Deinococcus ficus	2.78e-06	1.57e-05	0	1.66e-06	0	3.09e-07	3.5e-08	0	3.1e-07	4.86e-08	2.14e-07	0.000117529	6.05e-07	0	3.09e-06
Deinococcus geothermalis	1.98e-06	1.22e-05	0	4.43e-07	0	1.03e-06	7e-08	1.57e-07	0	4.86e-08	1.07e-07	5.34e-05	9.08e-07	0	9.65e-07
Deinococcus gobiensis	7.54e-06	1.65e-05	0	6.65e-07	0	3.09e-07	0	3.14e-07	0	0	2.14e-07	6.81e-05	8.05e-06	0	5.79e-06
Deinococcus irradiatisoli	1.98e-06	9.58e-06	4.9e-07	1.11e-06	0	2.68e-06	3.5e-08	1.57e-07	3.41e-06	4.86e-08	0	8.55e-05	3.81e-06	0	1.87e-06
Deinococcus maricopensis	4.76e-06	2.35e-05	9.19e-07	7.76e-07	0	4.32e-06	4.2e-07	0	0	2.92e-07	0	0.000101503	4.3e-06	0	1.29e-06
Deinococcus metallilatus	3.97e-06	1.31e-05	0	5.54e-07	0	2.06e-07	3.5e-08	0	0	9.73e-08	2.14e-07	7.75e-05	5.45e-07	1.3e-07	2.57e-06
Deinococcus peraridilitoris	5.87e-05	1.74e-05	1.84e-07	1.88e-06	0	9.26e-07	1.05e-06	0	1.55e-07	2.92e-06	6.42e-07	7.21e-05	5.69e-06	0	3.22e-07
Deinococcus psychrotolerans	4.36e-06	2.7e-05	0	2.22e-07	0	2.06e-07	2.45e-07	0	0	0	2.14e-07	6.81e-05	3.03e-07	7.16e-07	4.5e-07
Deinococcus puniceus	2.54e-05	2.52e-05	0	9.97e-07	0	2.06e-07	0	0	0	0	3.21e-07	5.74e-05	2.78e-06	0	2.64e-05
Deinococcus radiodurans	4.76e-06	1.92e-05	0	3.1e-06	0	3.09e-07	7e-08	3.14e-07	0	0	0	6.28e-05	1.21e-07	1.3e-07	1.22e-06
Deinococcus radiopugnans	3.57e-06	6.09e-06	6.13e-08	2.44e-06	0	3.09e-07	3.5e-08	1.57e-07	0	4.86e-08	0	7.35e-05	1.21e-07	1.3e-07	1.64e-05
Deinococcus rubellus	8.33e-06	1.13e-05	1.23e-07	3.32e-07	0	2.06e-07	3.5e-08	4.71e-07	0	4.86e-08	0	6.28e-05	1.21e-07	6.51e-08	1.87e-06
Deinococcus sp. AJ005	5.95e-06	1.92e-05	0	1.33e-06	0	9.26e-07	0	1.57e-07	0	6.81e-07	2.68e-06	0.000141569	6.66e-07	6.51e-08	2.24e-05
Deinococcus sp. KNUC1210	1.31e-05	5.4e-05	6.13e-08	1.66e-06	0	4.12e-07	3.5e-08	3.14e-07	1.55e-07	4.86e-08	1.61e-06	7.35e-05	3.45e-06	2.6e-07	2.32e-06
Deinococcus sp. NW-56	5.16e-06	8.71e-06	6.13e-08	8.86e-07	0	5.15e-07	7e-08	1.57e-07	0	4.38e-07	5.35e-07	8.28e-05	1.09e-06	0	3.86e-06
Deinococcus sp. QL22	2.54e-05	9.58e-06	6.13e-08	1.33e-06	0	1.23e-06	0	0	0	9.73e-08	0	5.61e-05	7.87e-07	0	3.88e-05
Deinococcus taeanensis	2.38e-06	1.13e-05	0	3.32e-07	0	2.37e-06	7e-08	0	0	1.8e-06	1.28e-06	7.48e-05	2.18e-06	0	3.28e-06
Deinococcus wulumuqiensis	5.55e-06	1.31e-05	0	2.22e-07	0	6.17e-07	3.5e-08	1.57e-07	0	0	1.5e-06	9.08e-05	2.54e-06	0	2.7e-06
Delftia acidovorans	0.000260683	0.000367392	8.58e-07	1.45e-05	1.89e-06	2.78e-05	2.03e-06	0.000187933	0	8.27e-07	3.96e-06	0.000257763	1.38e-05	2.8e-06	3.27e-05
Delftia lacustris	3.02e-05	3.92e-05	5.76e-06	9.64e-06	0	4.94e-06	1.68e-06	7.22e-06	3.26e-06	4.86e-08	6.42e-07	4.14e-05	7.87e-07	3.9e-07	1.32e-05
Delftia sp. Cs1-4	2.14e-05	7.23e-05	0	2.1e-06	1.26e-07	2.68e-06	7e-08	1.96e-05	0	1.46e-07	3.21e-07	5.34e-05	3.51e-06	6.51e-08	3.86e-06
Delftia sp. HK171	1.63e-05	5.14e-05	0	9.97e-07	0	1.85e-06	1.05e-07	2.24e-05	0	0	2.14e-07	1.6e-05	2.42e-07	6.51e-08	2.25e-06
Delftia sp. KV29	1.98e-06	0	0	0	0	3.09e-07	0	0	0	0	0	0	2.66e-06	0	3.35e-06
Delftia tsuruhatensis	0.000149982	0.000459675	6.13e-08	1.45e-05	0	3.12e-05	4.9e-07	1.54e-05	1.24e-06	1.22e-06	7.17e-06	0.000325877	1.25e-05	4.55e-07	3.83e-05
Demequina sediminis	1.03e-05	2.96e-05	0	6.65e-07	0	3.29e-06	3.5e-08	0	0	0	1.07e-07	5.48e-05	4.24e-07	0	1.16e-06
Demequina sp. TMPB413	1.47e-05	4.88e-05	1.84e-07	4.43e-07	0	5.87e-06	3.15e-07	0	0	4.09e-06	1.07e-07	6.81e-05	3.63e-07	2.99e-06	3.22e-06
Denitratisoma oestradiolicum	1.51e-05	7.57e-05	6.13e-08	1.44e-06	0	2.16e-06	2.1e-07	3.14e-07	0	0	1.39e-06	0.000434057	5.51e-06	6.51e-07	8.3e-06
Denitratisoma sp. DHT3	2.3e-05	9.32e-05	2.45e-07	1.22e-06	6.29e-08	1.65e-06	1.75e-07	4.71e-07	1.55e-07	4.86e-08	1.82e-06	0.000520869	6.96e-06	9.11e-07	9.52e-06
Denitrificimonas caeni	3.57e-06	1.04e-05	6.13e-08	7.64e-06	9.44e-07	4.32e-06	2.66e-06	6.27e-07	4.34e-06	3.89e-07	1.5e-06	4.54e-05	4.24e-07	1.24e-06	3.03e-05
Dermabacter jinjuensis	1.27e-05	1.92e-05	0	3.32e-07	0	2.06e-06	3.5e-08	0	0	5.35e-07	1.07e-07	2.27e-05	6.05e-08	0	3.22e-07
Dermabacter vaginalis	1.23e-05	1.39e-05	0	2.22e-07	0	2.57e-06	3.5e-08	0	1.55e-07	0	0	3.21e-05	1.82e-07	6.51e-08	5.15e-07
Dermacoccus nishinomiyaensis	9.52e-06	2.87e-05	0	1.77e-06	0	1.44e-06	1.4e-07	3.14e-07	0	4.86e-07	1.07e-07	6.01e-05	1.33e-06	2.6e-07	2.96e-06
Dermacoccus sp. PAMC28757	1.59e-05	9.58e-06	0	1.11e-06	0	1.44e-06	0	0	0	0	0	6.28e-05	1.21e-07	0	8.36e-07
Dermatobacter hominis	3.33e-05	8.88e-05	0	1.33e-06	0	4.73e-06	1.05e-07	3.14e-07	0	9.73e-08	5.35e-07	0.000442071	3.94e-06	3.25e-07	3.99e-06
Desulfarculus baarsii	9.13e-06	2.26e-05	1.35e-06	4.43e-07	6.29e-08	1.03e-06	9.8e-07	0	0	4.38e-07	4.28e-07	0.000204341	1.21e-06	0	7.08e-07
Desulfatibacillum aliphaticivorans	5.95e-06	1.22e-05	3.8e-06	4.1e-06	0	0	1.26e-06	0	0	0	9.63e-07	0.000136227	4.24e-07	6.51e-08	3.22e-07
Desulfitobacterium hafniense	1.19e-06	5.22e-06	2.52e-05	0	0	7.2e-07	7e-08	0	0	2.43e-07	0	4.27e-05	1.82e-07	0	2.57e-07
Desulfobacca acetoxidans	1.19e-06	1.04e-05	0	0	0	5.15e-07	0	0	0	0	0	0.000112187	8.48e-07	0	1.29e-07
Desulfobulbus oligotrophicus	2.38e-06	5.22e-06	0	4.43e-07	0	7.2e-07	7e-08	0	6.2e-07	0	0	8.81e-05	1.82e-07	1.95e-07	7.08e-07
Desulfobulbus oralis	3.17e-06	5.22e-06	0	0	0	2.06e-07	0	2.98e-06	1.55e-07	0	0	9.08e-05	1.82e-07	1.3e-07	1.93e-07
Desulfobulbus propionicus	6.75e-06	1.83e-05	3.68e-07	4.54e-06	0	2.37e-06	3.15e-07	2.2e-06	1.55e-07	2.92e-07	9.63e-07	0.000483473	6.17e-06	6.51e-08	6.43e-07
Desulfocapsa sulfexigens	1.98e-06	6.96e-06	0	1.11e-07	0	0	3.5e-08	1.1e-06	1.09e-06	1.95e-07	2.14e-07	0.000106845	6.05e-08	0	1.93e-07
Desulfococcus multivorans	3.97e-06	2.61e-06	0	0	0	1.03e-07	1.75e-07	4.71e-07	0	5.84e-07	1.5e-06	0.000144241	1.82e-07	6.51e-08	2.57e-07
Desulfocurvibacter africanus	2.78e-06	2.44e-05	0	7.76e-07	0	3.09e-07	0	0	1.55e-07	9.73e-08	5.35e-07	0.000182972	6.66e-07	0	8.36e-07
Desulfofarcimen acetoxidans	1.39e-05	6.96e-06	0	0	8.81e-07	6.17e-07	0	1.57e-07	0	0	1.07e-07	5.48e-05	2.42e-07	1.3e-07	3.22e-07
Desulfofustis limnaeus	3.57e-06	1.04e-05	0	3.32e-07	0	2.06e-07	0	0	0	4.86e-08	1.07e-07	0.000190985	7.02e-06	1.59e-05	5.15e-07
Desulfoglaeba alkanexedens	3.17e-06	2.35e-05	0	3.32e-07	0	2.06e-07	3.5e-08	0	0	0	0	0.00016561	3.03e-07	0	7.72e-07
Desulfohalobium retbaense	1.59e-06	3.48e-06	3.12e-06	2.22e-07	3.15e-07	5.15e-07	2.8e-07	1.57e-07	0	0	0	6.28e-05	4.24e-07	3.25e-07	5.79e-07
Desulfolithobacter dissulfuricans	7.94e-07	1.22e-05	6.13e-08	1.11e-07	0	1.54e-06	2.45e-07	1.57e-06	1.09e-06	1.95e-07	0	0.000142905	1.82e-07	0	6.43e-08
Desulfoluna limicola	4.76e-06	7.84e-06	0	4.43e-07	0	1.03e-06	3.5e-08	0	1.55e-07	6.81e-07	1.07e-07	8.41e-05	1.82e-07	0	3.86e-07
Desulfolutivibrio sulfodismutans	2.78e-06	1.31e-05	0	7.76e-07	0	7.2e-07	7e-08	7.84e-07	3.1e-07	5.35e-07	5.35e-07	0.000197663	1.76e-06	4.55e-07	4.5e-07
Desulfolutivibrio sulfoxidireducens	2.38e-06	9.58e-06	0	7.76e-07	0	6.17e-07	0	0	0	2.92e-07	0	0.000205676	9.08e-07	0	9.65e-07
Desulfomicrobium baculatum	1.19e-06	7.75e-05	0	0	0	2.06e-07	3.5e-08	1.57e-07	0	3.79e-06	0	9.62e-05	3.03e-07	6.51e-08	5.15e-07
Desulfomicrobium orale	3.97e-07	6.96e-06	1.1e-06	7.76e-07	0	1.44e-06	3.5e-08	0	0	0	0	6.14e-05	1.7e-06	0	1.29e-07
Desulfomicrobium sp. ZS1	2.78e-06	3.22e-05	0	5.54e-07	0	6.17e-07	3.5e-08	0	0	3.36e-06	2.14e-07	6.81e-05	1.57e-06	6.51e-08	4.5e-07
Desulfomonile tiedjei	2.38e-06	2.79e-05	6.13e-08	2.22e-07	0	0	0	0	0	0	0	0.000109516	3.03e-07	0	1.93e-07
Desulfonema limicola	3.97e-07	1.39e-05	0	4.43e-07	6.86e-06	1.34e-06	1.75e-07	0	0	2.92e-07	0	3.61e-05	1.82e-07	0	3.86e-07
Desulfonema magnum	3.57e-06	6.96e-06	3.25e-06	4.43e-07	0	7.2e-07	0	6.27e-07	0	0	0	7.35e-05	1.82e-07	3.25e-07	2.57e-07
Desulfopila sp. IMCC35008	1.98e-06	0.000125366	0	2.22e-07	0	3.09e-07	0	0	3.1e-07	4.86e-08	1.07e-07	7.75e-05	6.05e-08	4.55e-07	1.93e-07
Desulfosarcina alkanivorans	4.36e-06	6.09e-06	0	1.11e-06	6.29e-08	5.15e-07	7e-08	1.57e-07	1.55e-07	1.46e-07	1.07e-07	0.000146912	7.26e-07	1.76e-06	1.48e-06
Desulfosarcina ovata	7.54e-06	1.74e-05	0	6.65e-07	0	1.13e-06	5.95e-07	3.14e-07	3.1e-07	9.73e-08	3.21e-07	0.00017763	2e-06	3.25e-07	5.79e-07
Desulfosarcina widdelii	4.36e-06	2e-05	0	2.44e-06	0	8.23e-07	1.05e-07	1.1e-06	0	2.92e-07	0	0.000149583	2.36e-06	0	3.86e-07
Desulfoscipio gibsoniae	2.38e-06	8.71e-07	0	0	6.29e-08	0	0	0	0	1.11e-05	1.07e-07	4.54e-05	1.21e-07	0	1.29e-07
Desulfosediminicola flagellatus	3.57e-06	3.48e-05	0	2.22e-07	0	3.09e-07	3.85e-07	2.82e-06	5.43e-06	4.86e-08	0	6.14e-05	4.54e-06	9.76e-07	1.29e-07
Desulfosediminicola ganghwensis	1.11e-05	5.22e-06	0	0	0	4.12e-07	0	6.27e-07	7.6e-06	0	3.21e-07	9.48e-05	4.84e-07	0	7.08e-07
Desulfosporosinus acidiphilus	1.59e-06	6.09e-06	2.27e-06	1.11e-07	0	3.09e-07	0	0	4.65e-07	2.43e-07	0	4.54e-05	6.05e-08	2.02e-06	3.22e-07
Desulfosporosinus meridiei	3.57e-06	1.74e-05	3.43e-06	1.11e-07	0	6.17e-07	1.19e-06	1.25e-06	1.55e-07	5.84e-07	0	2.54e-05	1.21e-07	1.89e-06	2.12e-06
Desulfosporosinus orientis	4.76e-06	3.48e-06	7.96e-07	1.11e-06	0	7.2e-07	4.2e-07	1.57e-07	5.74e-06	0	6.42e-07	2.54e-05	6.05e-08	0	1.93e-07
Desulfosporosinus youngiae	4.76e-06	6.09e-06	0	3.32e-07	0	1.03e-07	1.75e-06	1.57e-07	4.65e-07	0	2.03e-06	2.94e-05	3.03e-07	0	1.29e-07
Desulfosudis oleivorans	6.75e-06	6.09e-06	6.13e-08	2.22e-07	0	1.03e-07	1.75e-07	0	4.65e-07	0	0	0.000126878	3.21e-06	1.95e-07	3.86e-07
Desulfovibrio desulfuricans	8.33e-06	2.87e-05	6.13e-08	8.53e-06	0	8.23e-07	6.65e-07	9.41e-07	6.2e-07	2.29e-06	9.63e-07	0.000182972	4.84e-07	2.47e-06	2.77e-06
Desulfovibrio fairfieldensis	5.16e-06	1.65e-05	0	2.22e-07	0	3.09e-07	3.5e-08	3.14e-07	6.2e-07	9.73e-08	1.07e-07	0.000105509	4.24e-07	0	3.22e-07
Desulfovibrio ferrophilus	2.78e-06	6.09e-06	0	1.77e-06	0	5.15e-07	1.4e-07	0	0	0	0	8.81e-05	2.42e-07	4.55e-07	6.43e-07
Desulfovibrio mangrovi	5.55e-06	4.35e-06	1.53e-06	0	0	0	2.45e-07	0	1.55e-07	0	0	6.28e-05	1.21e-07	6.51e-08	5.79e-07
Desulfovibrio piger	5.55e-06	6.96e-06	0	6.65e-07	0	5.15e-07	0	0	0	4.38e-07	0	0.000133556	5.27e-06	2.34e-06	5.47e-06
Desulfovibrio subterraneus	2.38e-06	8.71e-06	0	3.77e-06	0	8.23e-07	7e-08	0	0	4.86e-08	1.07e-07	6.68e-05	1.82e-07	0	1.93e-07
Desulfovibrio vulgaris	5.16e-06	3.05e-05	0	0	1.26e-07	5.15e-07	3.5e-08	3.14e-07	4.65e-07	0	0	0.000146912	6.05e-07	1.95e-07	1.22e-06
Desulfurispirillum indicum	2.38e-06	5.57e-05	0	1.11e-07	4.41e-07	4.12e-07	7e-07	1.57e-07	0	9.73e-07	1.28e-06	8.41e-05	4.24e-07	1.3e-07	6.43e-07
Desulfurivibrio alkaliphilus	3.97e-06	9.58e-06	0	1.11e-07	0	1.03e-07	2.45e-07	2.35e-06	0	0	0	0.000144241	6.05e-07	2.47e-06	3.22e-07
Desulfuromonas soudanensis	4.76e-06	1.74e-05	0	1.11e-07	0	1.03e-07	0	0	0	0	0	0.000251085	6.6e-06	0	1.09e-06
Desulfuromonas sp. AOP6	2.38e-06	9.58e-06	0	1.99e-06	0	3.09e-07	0	0	1.55e-07	9.73e-08	0	0.000145576	1.21e-06	0	6.43e-08
Desulfuromonas sp. DDH964	1.03e-05	1.65e-05	0	2.22e-07	6.29e-08	6.17e-07	3.5e-08	0	0	4.86e-08	1.07e-07	0.000279132	8.48e-07	6.51e-08	1.67e-06
Desulfuromonas versatilis	7.94e-06	8.71e-06	0	1.66e-06	0	4.12e-07	4.2e-07	9.41e-07	7.75e-07	7.78e-07	3.21e-07	0.000337897	4.24e-07	1.95e-07	1.16e-06
Devosia beringensis	5.16e-05	0.00020372	0	2.66e-06	0	8.44e-06	6.3e-07	0	1.55e-07	1.46e-07	2.14e-07	0.000164274	8.48e-07	0	5.92e-06
Devosia ginsengisoli	3.73e-05	0.000222002	3.06e-07	5.54e-06	0	2.88e-06	1.4e-07	9.57e-06	1.24e-06	4.86e-08	1.07e-07	0.000156261	2.85e-06	0	5.92e-06
Devosia neptuniae	3.13e-05	0.000186308	0	5.54e-06	0	3.81e-06	5.6e-07	7.84e-06	6.2e-07	2.43e-07	1.07e-07	0.000128214	1.27e-06	7.16e-07	3.92e-06
Devosia oryziradicis	2.86e-05	9.32e-05	6.13e-08	3.55e-06	0	2.78e-06	0	3.14e-07	3.1e-07	1.46e-07	1.18e-06	0.000136227	7.87e-07	6.51e-08	5.21e-06
Devosia rhizoryzae	2.86e-05	5.48e-05	5.51e-07	2.88e-06	0	3.09e-06	1.75e-07	4.71e-06	3.1e-07	2.92e-07	2.14e-07	0.000132221	6.66e-07	0	3.67e-06
Devosia salina	4.64e-05	0.000139295	3.37e-06	2.22e-06	0	3.09e-06	1.92e-06	0	0	2.43e-07	5.35e-07	0.000158932	1.57e-06	6.51e-07	2.83e-06
Devosia sp.	8.05e-05	0.000114048	1.84e-07	6.54e-06	0	6.07e-06	3.85e-07	4.24e-06	0	1.95e-07	2.14e-07	0.000252421	4.84e-06	1.3e-07	6.88e-06
Devosia sp. 1566	3.41e-05	0.000183696	1.04e-06	4.43e-06	0	1.96e-06	1.82e-06	1.63e-05	1.55e-07	4.86e-08	0	0.000133556	7.87e-07	1.95e-07	3.09e-06
Devosia sp. A16	0.000110701	0.00023332	9.19e-07	6.54e-06	1.26e-07	1.75e-06	1.43e-06	1.25e-06	6.2e-07	0	0	0.000353924	1.2e-05	5.21e-07	1.06e-05
Devosia sp. FJ2-5-3	0.00348649	0.000155837	6.13e-08	2.66e-06	0	1.34e-06	7.35e-07	1.41e-06	6.2e-07	4.86e-08	1.07e-07	0.000121536	1.03e-06	6.51e-08	3.41e-06
Devosia sp. G20-9	1.19e-05	0.000134942	6.13e-08	4.43e-07	0	4.12e-07	0	3.14e-07	3.1e-07	9.73e-08	0	8.95e-05	5.45e-07	4.55e-07	1.22e-06
Devosia sp. G2-5	1.27e-05	0.000119272	0	9.97e-07	0	4.12e-07	1.19e-06	9.41e-07	0	4.38e-07	0	5.34e-05	1.94e-06	1.95e-07	1.03e-06
Devosia sp. I507	3.33e-05	0.000250732	6.13e-08	1.99e-06	6.29e-08	2.47e-06	2.45e-07	2.98e-06	1.55e-07	4.86e-08	0	9.48e-05	1.15e-06	2.86e-06	3.15e-06
Devosia sp. J2-20	2.74e-05	2.26e-05	0	1.55e-06	0	2.37e-06	1.78e-06	1.25e-06	1.55e-07	1.95e-07	0	0.000110852	6.66e-07	6.51e-07	4.83e-06
Devosia sp. JXJ CY 41	3.89e-05	0.000236802	6.13e-08	3.43e-06	6.29e-08	3.81e-06	1.05e-07	0	4.65e-07	0	3.21e-07	0.000132221	1.63e-06	0	4.57e-06
Devosia sp. MC521	2.1e-05	0.000194143	0	1.77e-06	1.26e-07	6.48e-06	7e-08	0	0	0	5.35e-07	8.95e-05	8.48e-07	0	1.09e-06
Devosia sp. RR2S18	1.79e-05	0.000222002	6.25e-06	1.55e-06	0	8.23e-07	3.64e-06	3.92e-06	3.1e-07	2.43e-07	1.71e-06	0.000130885	5.45e-07	0	2.19e-06
Devosia sp. SD17-2	9.17e-05	0.000315156	0	2.1e-06	0	1.23e-06	2.1e-07	5.96e-06	1.24e-06	3.41e-07	1.5e-06	0.000105509	6.36e-06	5.73e-06	1.74e-06
Devosia sp. SL43	4.32e-05	0.000117531	6.13e-08	7.76e-06	0	3.81e-06	3.85e-07	4.71e-06	0	0	3.21e-07	0.000164274	1.21e-06	2.73e-06	9.07e-06
Devosia sp. YIM 151766	8.17e-05	6.62e-05	0	1.88e-06	0	1.03e-06	5.6e-07	1.19e-05	3.1e-07	4.86e-08	2.14e-07	0.00010818	7.87e-07	0	2.96e-06
Devriesea agamarum	3.17e-06	2.7e-05	5.33e-06	1.11e-06	0	2.68e-06	2.59e-06	0	0	0	1.07e-07	2.27e-05	0	8.07e-06	1.93e-07
Dialister massiliensis	0	0	0	0	0	0	0	0	0	3.41e-07	3.21e-07	4.01e-06	0	0	1.96e-05
Diaminobutyricimonas sp. LJ205	4.64e-05	0.000118401	0	1.44e-06	0	8.44e-06	3.5e-08	4.71e-07	1.55e-07	4.86e-08	0	5.34e-05	6.66e-07	0	2.7e-06
Diaphorobacter aerolatus	0.00010594	0.000370003	7.35e-07	7.42e-06	0	1.57e-05	8.05e-07	4.39e-06	0	4.86e-06	2.78e-06	0.000181636	1.14e-05	5.86e-07	2.46e-05
Diaphorobacter nitroreducens	1.43e-05	3.48e-05	0	9.53e-06	0	8.03e-06	3.5e-08	3.14e-07	0	9.73e-08	2.14e-07	4.14e-05	3.51e-06	0	4.05e-06
Diaphorobacter ruginosibacter	0.000103162	0.000313415	9.8e-07	8.2e-06	0	2.21e-05	2.1e-07	6.27e-07	4.65e-07	5.35e-07	3.53e-06	0.000217696	7.87e-06	3.25e-07	2.86e-05
Diaphorobacter sp. C33	9.13e-06	3.31e-05	0	7.76e-07	0	4.32e-06	0	1.57e-07	0	0	0	2.14e-05	1.27e-06	0	2.7e-06
Diaphorobacter sp. ED-3	9.92e-06	3.05e-05	1.23e-07	7.76e-07	0	3.09e-06	0	3.14e-07	3.1e-07	0	1.39e-06	2.54e-05	6.05e-07	0	3.99e-06
Diaphorobacter sp. HDW4A	0.000110304	0.000471863	1.23e-07	1.05e-05	6.29e-08	2.91e-05	3.5e-07	9.41e-07	6.2e-07	4.86e-07	4.28e-06	0.000259099	1.45e-05	5.21e-07	6.16e-05
Diaphorobacter sp. HDW4B	0.000149585	0.000453581	2.41e-05	1.47e-05	0	2.83e-05	7.7e-07	9.41e-07	1.09e-06	9.24e-07	5.78e-06	0.000227045	7.63e-06	2.93e-06	2.95e-05
Diaphorobacter sp. JS3050	8.33e-06	4.18e-05	7.96e-06	6.65e-07	0	2.98e-06	2.8e-06	1.57e-07	0	0	0	1.47e-05	1.21e-07	0	4.05e-06
Diaphorobacter sp. JS3051	1.71e-05	2.87e-05	1.23e-07	0	0	3.19e-06	7e-08	0	0	9.73e-08	1.07e-07	1.34e-05	2.42e-06	0	6.82e-06
Diaphorobacter sp. MNS-0	4.36e-06	3.66e-05	0	9.97e-07	0	3.19e-06	0	0	0	6.32e-07	0	1.2e-05	2.42e-07	6.51e-08	3.54e-06
Dickeya chrysanthemi	2.78e-05	7.84e-06	0	0.000132944	5.35e-06	5.44e-05	4.76e-06	4.17e-05	5.15e-05	1.22e-05	6.23e-05	9.22e-05	7.29e-05	0.000476604	7.66e-06
Dickeya dadantii	5.12e-05	1.04e-05	6.13e-08	6.25e-05	9e-06	5.03e-05	9.48e-06	3.28e-05	3.68e-05	1.1e-05	5.43e-05	7.48e-05	0.000127918	0.000344912	1.34e-05
Dickeya dianthicola	5e-05	1.13e-05	1.84e-07	5.87e-05	4.03e-06	4.73e-05	1.68e-05	2.92e-05	3.41e-05	4.38e-06	4.32e-05	5.61e-05	4.72e-05	0.000264686	1.22e-06
Dickeya fangzhongdai	2.54e-05	1.04e-05	1.59e-06	5.73e-05	6.61e-06	3.66e-05	1.4e-06	2.31e-05	2.59e-05	4.18e-06	1.69e-05	3.21e-05	2.4e-05	0.00013937	3.22e-07
Dickeya lacustris	9.92e-06	4.53e-05	0	6.81e-05	3.4e-06	2.56e-05	3.01e-06	3.7e-05	7.88e-05	1.04e-05	2.08e-05	3.34e-05	3.03e-05	0.000135857	1.29e-07
Dickeya oryzae	2.22e-05	4.35e-06	0	6.54e-05	1.83e-06	1.23e-06	0	1.57e-06	3.1e-06	0	2.14e-06	6.68e-06	2.06e-06	5.08e-05	2.57e-07
Dickeya parazeae	0	0	0	3.35e-05	6.29e-08	1.85e-06	9.1e-07	4.55e-06	1.55e-07	2.92e-07	4.82e-06	9.35e-06	1.7e-05	2.04e-05	1.29e-07
Dickeya poaceiphila	1.63e-05	6.01e-05	0	4.42e-05	6.29e-08	1.23e-05	2.06e-06	3.22e-05	2.19e-05	6.81e-06	4.47e-05	3.61e-05	4.68e-05	0.000113865	9.07e-06
Dickeya solani	3.57e-06	6.09e-06	6.13e-07	5.86e-05	2.52e-07	1.57e-05	2.38e-06	1.96e-05	1.16e-05	3.41e-06	6.49e-05	2.4e-05	1.49e-05	0.000303595	4.5e-07
Dickeya sp. DW 0440	1.19e-06	0	0	2.1e-06	0	4.22e-06	9.03e-06	2.98e-06	2.33e-06	0	0	0	1.76e-06	2.6e-07	0
Dickeya sp. NCPPB 3274	7.94e-07	0	6.13e-08	1.62e-05	0	8.23e-06	2.48e-06	4.55e-06	2.95e-06	5.35e-07	1.13e-05	5.34e-06	5.69e-06	1.44e-05	6.43e-07
Dickeya sp. Secpp 1600	1.19e-06	0	0	9.97e-06	0	1.96e-06	1.19e-06	1.25e-05	0	0	5.46e-06	4.01e-06	1.32e-05	0	1.67e-06
Dickeya zeae	3.73e-05	2.26e-05	1.13e-05	0.000125521	1.83e-05	7.02e-05	6.54e-06	6.2e-05	7.57e-05	1.8e-05	0.000101783	7.21e-05	0.0001798	0.000295007	4.31e-06
Dietzia kunjamensis	1.98e-06	2.52e-05	0	6.65e-07	0	2.06e-07	0	0	3.1e-07	0	4.28e-07	5.34e-05	5.45e-07	1.3e-07	1.27e-05
Dietzia lutea	3.97e-06	4.35e-06	9.19e-07	3.32e-07	0	7.2e-07	4.2e-07	0	0	9.73e-08	0	3.07e-05	3.03e-07	0	2.57e-06
Dietzia psychralcaliphila	6.35e-06	1.31e-05	0	5.54e-07	0	1.23e-06	3.5e-08	4.71e-07	0	4.86e-07	0	6.54e-05	1.82e-07	5.21e-07	5.53e-06
Dietzia sp. B32	4.76e-06	1.65e-05	0	2.22e-07	0	2.06e-07	3.5e-07	0	0	0	0	5.34e-05	3.03e-07	0	2.38e-06
Dietzia sp. oral taxon 368	2.38e-06	1.22e-05	0	6.65e-07	0	2.06e-07	7e-08	0	0	9.73e-08	1.07e-07	4.01e-05	1.82e-07	0	3.86e-06
Dietzia timorensis	3.57e-06	2.26e-05	0	2.22e-07	0	6.17e-07	0	0	0	9.73e-08	2.03e-06	7.61e-05	1.82e-07	0	1.22e-06
Dinoroseobacter shibae	1.67e-05	9.66e-05	0	3.32e-07	0	1.13e-06	0	1.57e-07	7.75e-07	4.86e-08	1.07e-07	0.000104174	1.7e-06	1.3e-07	1.8e-06
Dokdonella koreensis	2.38e-05	1.83e-05	7.84e-06	3.88e-06	6.29e-08	4.84e-06	3.25e-06	6.27e-07	9.3e-07	4.38e-07	1.82e-06	0.000204341	5.45e-06	4.55e-07	7.14e-06
Dokdonia sp. 4H-3-7-5	1.83e-05	3.48e-05	1.23e-07	0	0	5.15e-07	7e-08	0	6.2e-07	0	0	1.47e-05	4.84e-07	1.95e-07	5.15e-07
Dokdonia sp. MED134	4.17e-05	6.27e-05	6.13e-08	0	0	1.03e-07	0	0	2.64e-06	0	0	4.01e-06	3.63e-07	0	1.29e-07
Dokdonia sp. PRO95	1.27e-05	5.92e-05	4.29e-07	1.11e-07	0	2.06e-07	3.5e-08	3.14e-07	4.03e-06	3.89e-07	1.07e-07	9.35e-06	7.87e-07	7.81e-06	5.15e-07
Dolichospermum compactum	1.19e-06	1.13e-05	0	3.99e-06	0	0	0	0	0	2.43e-07	1.07e-07	8.01e-06	0.000195479	0	3.86e-07
Dolichospermum flos-aquae	0	7.84e-06	0	9.75e-06	0	0	0	0	1.55e-07	0	0	2.67e-06	7e-05	0	6.43e-08
Dolichospermum heterosporum	7.94e-07	2.61e-06	0	1.66e-06	0	0	0	0	0	0	0	2.67e-06	0.000114055	0	2.57e-07
Dolichospermum sp. UHCC 0315A	0	2.61e-06	0	9.97e-06	0	0	0	0	0	0	0	5.34e-06	7.48e-05	0	6.43e-08
Dolosigranulum pigrum	2.78e-06	4.35e-06	0	1.11e-07	0	4.12e-07	2.1e-07	1.57e-07	1.55e-07	0	0	2.94e-05	3.63e-07	0	4.12e-06
Dongshaea marina	3.17e-06	3.48e-06	0	2.88e-06	2.52e-07	1.34e-06	7.35e-07	3.14e-07	3.26e-06	4.86e-08	6.42e-07	2e-05	1.13e-05	7.16e-06	1.42e-06
Dorea formicigenerans	0	2.61e-06	0	0	1.26e-07	1.03e-07	0	0	0	0	0	1.34e-05	1.21e-07	0	5.66e-06
Dorea longicatena	3.57e-06	2.61e-06	4.29e-07	2.22e-07	5.67e-07	0	0	1.57e-07	1.55e-07	0	0	3.61e-05	1.21e-07	0	1.8e-05
Draconibacterium halophilum	4.4e-05	2.44e-05	0	3.32e-07	0	1.23e-06	0	0	1.55e-07	0	3.21e-07	3.47e-05	6.66e-07	3.38e-06	7.72e-07
Draconibacterium orientale	3.57e-06	3.13e-05	0	2.22e-07	0	2.06e-07	0	3.14e-07	8.84e-06	0	1.07e-07	3.07e-05	6.05e-07	1.63e-06	7.72e-07
Duffyella gerundensis	3.45e-05	3.22e-05	1.84e-07	0.000256914	1.2e-06	8.42e-05	3.46e-06	7.17e-05	9.44e-05	2.7e-05	0.000327182	8.41e-05	4.46e-05	0.00012395	9.72e-06
Duganella dendranthematis	0.000250367	0.000404827	2.82e-06	0.000522802	0	5.43e-05	7.35e-07	4.55e-06	1.55e-06	3.65e-06	1.47e-05	0.000977631	0.0165267	1.61e-05	0.000104681
Duodenibacillus massiliensis	3.17e-06	1.39e-05	0	2.22e-07	0	1.65e-06	7e-08	2.04e-06	0	0	0	6.01e-05	5.45e-07	6.51e-08	2.38e-06
Dyadobacter chenhuakuii	5.16e-06	1.92e-05	0	6.65e-06	0	9.26e-07	0	6.27e-07	4.5e-06	4.86e-08	0	4.81e-05	4.84e-07	4.42e-06	3.28e-06
Dyadobacter chenwenxiniae	1.98e-06	1.65e-05	0	1.33e-06	0	1.34e-06	1.05e-07	0	3.1e-07	1.44e-05	3.21e-07	3.87e-05	3.63e-07	3.38e-06	1.16e-06
Dyadobacter fanqingshengii	5.16e-06	1.57e-05	0	1.88e-06	0	1.13e-06	0	3.14e-07	1.55e-07	2.92e-07	6.42e-07	2.94e-05	4.24e-07	2.47e-06	6.43e-07
Dyadobacter fermentans	4.36e-06	4.09e-05	0	7.76e-07	0	1.13e-06	0	0	0	4.86e-08	1.07e-07	8.01e-05	1.03e-06	4.81e-06	9.01e-07
Dyadobacter pollutisoli	5.16e-06	1.22e-05	6.13e-08	2.77e-06	0	5.15e-07	0	0	3.1e-07	0	0	6.41e-05	4.24e-07	8.46e-07	1.22e-06
Dyadobacter sandarakinus	5.55e-06	1.83e-05	6.13e-08	2.44e-06	2.2e-06	5.15e-07	0	0	0	9.73e-08	1.07e-07	3.07e-05	6.05e-07	3.25e-07	4.5e-07
Dyadobacter sp. NIV53	1.47e-05	5.05e-05	4.86e-05	7.76e-07	2.52e-07	9.26e-07	3.5e-08	1.57e-07	1.55e-07	1.46e-07	2.14e-07	5.61e-05	3.03e-07	1.69e-06	2.44e-06
Dyella caseinilytica	2.06e-05	1.31e-05	5.51e-07	1.22e-06	6.92e-07	5.15e-07	3.15e-07	6.27e-07	3.1e-07	9.73e-08	9.63e-07	8.15e-05	1.03e-05	8.46e-07	1.42e-06
Dyella japonica	1.71e-05	1.65e-05	4.04e-06	9.97e-07	0	1.75e-06	2.31e-06	7.84e-07	7.75e-07	4.38e-06	2.25e-06	0.000114858	7.69e-06	5.86e-07	2.12e-06
Dyella sp. BiH032	1.63e-05	1.57e-05	1.78e-06	7.76e-07	6.29e-08	3.91e-06	8.05e-07	3.14e-07	0	0	2.03e-06	0.000125543	1.97e-05	1.3e-07	3.28e-06
Dyella sp. GSA-30	2.22e-05	2.52e-05	2.78e-05	3.21e-06	0	1.34e-06	7.91e-06	3.14e-06	4.65e-07	5.84e-07	4.28e-07	0.000118865	2.97e-05	3.9e-07	3.35e-06
Dyella sp. M7H15-1	5.95e-06	5.57e-05	1.57e-05	7.76e-06	6.29e-08	1.96e-06	4.9e-07	1.1e-06	0	2.43e-07	0	8.28e-05	2.42e-07	1.69e-06	8.62e-06
Dyella telluris	1.51e-05	2.26e-05	4.29e-06	3.32e-06	0	1.96e-06	2.87e-06	3.14e-07	3.1e-07	8.76e-07	2.89e-06	9.62e-05	1.79e-05	0	4.12e-06
Dyella terrae	1.47e-05	2.35e-05	6.49e-06	1.99e-06	6.29e-08	1.34e-06	2.45e-06	7.84e-07	1.55e-07	1.95e-07	5.35e-07	0.000134892	2.18e-06	5.21e-07	1.54e-06
Dyella thiooxydans	2.14e-05	4.35e-05	5.94e-06	2.1e-06	0	2.78e-06	1.68e-06	1.57e-07	1.55e-07	4.86e-08	5.35e-07	0.00016561	6.54e-06	2.54e-06	3.8e-06
Dysgonomonas sp. HDW5A	0.000312661	8.97e-05	0	0	0	1.03e-07	0	0.00171822	1.4e-06	0	1.07e-07	8.01e-06	2.42e-07	0	2.57e-07
Dysgonomonas sp. HDW5B	0.000350355	8.71e-05	0	3.32e-07	0	3.09e-07	7e-08	0.00231198	9.3e-07	0	2.14e-07	9.35e-06	3.63e-07	0	2.57e-07
Dysosmobacter welbionis	1.03e-05	2.44e-05	0	3.32e-07	0	6.17e-07	7e-08	0	0	0	1.07e-07	0.000116194	3.03e-07	2.6e-07	3.86e-06
Echinicola marina	5.95e-06	4.88e-05	0	0	0	5.15e-07	3.5e-08	0	0	0	1.07e-07	2.8e-05	1.03e-06	6.51e-08	4.5e-07
Echinicola soli	3.17e-06	1.04e-05	0	1.11e-07	0	3.09e-07	7e-08	6.27e-07	0	0	1.07e-07	2.54e-05	4.24e-07	5.66e-06	2.57e-07
Echinicola sp. 20G	7.94e-06	1.57e-05	0	1.11e-07	0	5.15e-07	2.45e-07	7.84e-07	0	0	0	2e-05	3.03e-07	9.76e-07	9.01e-07
Echinicola strongylocentroti	1.43e-05	2.87e-05	0	1.11e-07	0	5.15e-07	3.15e-07	0	0	0	2.14e-07	3.07e-05	5.45e-07	7.16e-07	1.29e-07
Echinicola vietnamensis	3.53e-05	0.000103601	0	0	0	0	0	7.84e-07	0	0	0	2.67e-05	4.84e-07	1.56e-06	5.15e-07
Ectothiorhodosinus mongolicus	2.78e-06	1.92e-05	2.32e-05	8.86e-07	1.32e-05	1.65e-06	4.9e-07	2.2e-06	1.09e-06	0	1.07e-07	5.21e-05	3.63e-07	3.58e-06	8.49e-06
Ectothiorhodospira haloalkaliphila	7.14e-06	1.48e-05	6.13e-08	1.77e-06	0	1.85e-06	3.5e-08	1.57e-07	9.3e-07	1.46e-07	3.1e-06	8.41e-05	2.42e-06	2.15e-06	5.15e-07
Ectothiorhodospira sp. BSL-9	6.35e-06	1.57e-05	6.13e-07	1.22e-06	0	3.09e-07	1.05e-07	0	0	4.86e-07	2.14e-07	0.000101503	9.2e-06	5.47e-06	1.03e-06
Edaphobacter flagellatus	4.36e-06	1.83e-05	0	3.1e-06	0	1.23e-06	1.75e-07	1.25e-06	0	0	0	0.000174958	3.63e-07	1.3e-07	1.29e-07
Edaphobacter lichenicola	5.55e-06	7.84e-06	0	1.11e-07	0	6.17e-07	4.2e-07	1.57e-07	0	1.46e-07	2.14e-07	0.000122872	8.48e-07	0	1.22e-06
Edaphobacter sp. 12200R-103	6.35e-06	9.58e-06	1.72e-06	2.22e-07	0	4.12e-07	8.05e-07	0	0	2.09e-06	9.63e-07	0.000172287	1.82e-07	0	2.57e-07
Edaphobacter sp. 4G125	3.17e-06	4.35e-06	0	1.11e-07	0	3.09e-07	0	0	0	4.86e-08	0	9.48e-05	7.87e-07	1.95e-07	6.43e-08
Edwardsiella anguillarum	4.76e-06	1.74e-06	0	8.97e-06	0	1.96e-06	9.8e-07	1.25e-06	4.19e-06	1.41e-06	6.53e-06	4.01e-06	1.02e-05	1.95e-07	0
Edwardsiella hoshinae	1.63e-05	1.74e-06	0	1.99e-05	1.51e-06	1.6e-05	8.75e-07	1e-05	2.57e-05	8.27e-07	4.23e-05	4.94e-05	2.94e-05	0.000124665	1.03e-06
Edwardsiella ictaluri	1.07e-05	8.71e-06	2.45e-07	2.27e-05	1.64e-06	8.75e-06	1.2e-05	1.51e-05	1.57e-05	1.67e-05	4.79e-05	4.41e-05	4.15e-05	9.54e-05	1.08e-05
Edwardsiella piscicida	1.39e-05	7.84e-06	1.78e-06	2.53e-05	3.69e-05	8.95e-06	4.72e-06	1.43e-05	1.89e-05	2.11e-05	6.56e-05	4.01e-05	1.29e-05	0.000104365	8.81e-06
Edwardsiella tarda	6.94e-05	1.22e-05	1.23e-07	9.07e-05	6.29e-06	4.03e-05	1.07e-05	4.5e-05	3.95e-05	1.33e-05	0.00012383	7.61e-05	7.78e-05	0.00022402	8.3e-06
Eggerthella guodeyinii	3.57e-06	1.31e-05	6.19e-06	3.32e-07	0	3.09e-07	0	1.57e-07	0	0	4.28e-07	5.61e-05	3.03e-07	6.51e-08	3.28e-06
Eggerthella lenta	5.16e-06	2.7e-05	1.23e-07	3.32e-07	0	2.06e-07	0	0	0	4.86e-07	1.07e-07	6.28e-05	5.93e-06	0	3.28e-06
Egibacter rhizosphaerae	8.33e-06	2e-05	0	1.11e-06	0	8.23e-07	6.65e-07	3.14e-07	1.55e-07	4.86e-08	1.07e-07	0.000215025	1.33e-06	3.25e-07	8.36e-07
Egicoccus halophilus	4.76e-06	3.92e-05	6.13e-08	5.54e-07	0	1.03e-07	3.85e-07	0	1.4e-06	9.73e-08	3.21e-07	0.000164274	7.93e-06	0	2.32e-06
Ehrlichia ruminantium	2.62e-05	3.05e-05	0	0	0	5.15e-07	0	0	0	0	0	2.94e-05	4.24e-07	0	1.29e-07
Eikenella corrodens	6.75e-06	2.18e-05	6.13e-08	2.99e-06	1.32e-06	1.34e-06	0	1.57e-07	0	1.95e-07	7.49e-07	4.94e-05	1.82e-07	3.25e-06	1.67e-06
Eikenella exigua	3.97e-06	1.13e-05	0	2.22e-07	1.57e-06	1.23e-06	0	0	0	0	0	2.27e-05	4.84e-07	2.73e-06	0
Eleftheria terrae	9.13e-05	0.000299485	4.78e-06	5.43e-06	7.81e-06	1.08e-05	2.06e-06	4.71e-07	1.24e-06	3.06e-06	4.5e-06	0.000462104	4.61e-05	2.6e-06	5.96e-05
Elioraea tepida	9.13e-06	0.000118401	6.13e-08	5.54e-07	0	8.23e-07	0	0	6.2e-07	3.89e-07	1.18e-06	0.000259099	1.33e-06	2.6e-07	2.06e-06
Elizabethkingia anophelis	1.63e-05	2.26e-05	6.13e-08	9.97e-07	0	1.03e-06	1.05e-07	2.35e-06	4.9e-05	9.73e-08	2.14e-07	2.14e-05	3.63e-07	4.42e-06	1.42e-06
Elizabethkingia bruuniana	1.35e-05	1.31e-05	1.23e-07	5.54e-07	0	3.09e-07	0	0	4.34e-06	0	3.21e-07	6.68e-06	2.42e-07	1.24e-06	2.12e-06
Elizabethkingia meningoseptica	6.35e-06	8.36e-05	6.13e-08	6.65e-07	6.29e-08	5.15e-07	0	3.14e-07	1.4e-06	0	3.21e-07	4.81e-05	6.66e-07	3.45e-06	3.86e-07
Elizabethkingia sp. JS20170427COW	3.61e-05	5.31e-05	2.76e-06	4.43e-07	0	4.12e-07	2.1e-07	3.14e-07	3.72e-06	4.86e-08	1.07e-07	3.21e-05	4.24e-07	1.69e-06	4.5e-07
Elusimicrobium minutum	1.59e-06	7.92e-05	0	2.22e-07	0	0	0	1.57e-07	0	0	0	0.000104174	0	0	1.29e-07
Empedobacter brevis	2.3e-05	0.000248991	1.84e-07	4.43e-07	0	8.23e-07	0	0	4.5e-06	0	7.49e-07	3.61e-05	9.08e-07	2.41e-06	1.35e-06
Empedobacter falsenii	5.08e-05	0.000174119	2.88e-05	4.43e-07	0	8.23e-07	3.5e-08	6.27e-07	1.36e-05	0	0	2.54e-05	4.24e-07	3.84e-06	2.38e-06
Empedobacter stercoris	6.07e-05	4.35e-06	4.29e-07	3.32e-07	0	4.12e-07	0	4.71e-07	3.41e-06	0	2.14e-07	1.47e-05	3.63e-07	0	2.57e-07
Emticicia oligotrophica	3.65e-05	8.71e-05	0	1.22e-06	0	3.4e-06	0	0	0	0	1.07e-07	4.27e-05	4.06e-06	8.2e-06	5.73e-06
Emticicia sp. 21SJ11W-3	2.22e-05	2.52e-05	1.23e-07	7.76e-07	0	1.13e-06	0	3.14e-07	0	0	0	4.94e-05	8.48e-07	6.51e-08	1.29e-06
endosymbiont of Acanthamoeba sp. UWC8	2.38e-06	0.000133201	0	0	0	0	0	0	0	0	0	4.14e-05	3.03e-07	0	1.29e-07
endosymbiont of unidentified scaly snail isolate Monju	8.73e-06	1.57e-05	4.29e-07	1.66e-06	2.52e-07	1.65e-06	1.05e-07	0	1.55e-07	6.81e-07	7.49e-07	0.000158932	2.24e-06	2.6e-07	9.01e-07
Endozoicomonas euniceicola	1.19e-06	6.09e-06	4.23e-06	2.22e-07	1.26e-07	1.44e-06	3.5e-07	9.41e-07	3.1e-07	4.86e-08	7.49e-07	3.61e-05	1.57e-06	2.73e-06	1.54e-06
Endozoicomonas montiporae	1.98e-06	7.84e-06	6.13e-08	1.33e-06	2.52e-07	1.65e-06	0	3.61e-06	8.37e-06	5.84e-07	7.49e-07	3.07e-05	2.42e-07	1.3e-07	2.57e-07
Endozoicomonas sp. 4G	3.97e-06	5.22e-06	6.62e-06	2.77e-06	6.29e-08	1.13e-06	1.33e-06	1.57e-06	4.03e-06	3.89e-07	2.46e-06	3.47e-05	2.42e-07	1.46e-05	4.5e-07
Endozoicomonas sp. GU-1	3.17e-06	2.35e-05	6.13e-08	3.32e-06	2.01e-06	2.26e-06	2.1e-07	2.04e-06	6.36e-06	3.41e-07	5.03e-06	3.34e-05	1.82e-07	1.63e-05	1.32e-05
Endozoicomonas sp. SCSIO W0465	3.97e-06	8.71e-06	1.23e-07	6.98e-06	0	1.54e-06	1.19e-06	2.04e-06	3.1e-06	3.89e-07	7.49e-07	6.01e-05	4.24e-07	3.19e-06	1.93e-07
Enhydrobacter sp.	0.000157521	0.000479699	6.13e-08	7.09e-06	0	3.91e-06	1.05e-07	6.27e-07	1.55e-07	2.92e-07	4.28e-07	0.00330151	2.54e-05	5.86e-07	3.04e-05
Ensifer adhaerens	3.45e-05	0.00043791	5.64e-06	8.75e-06	6.29e-08	1.23e-05	1.26e-06	1.4e-05	1.4e-06	1.46e-06	5.57e-06	0.000443406	7.63e-06	3.25e-07	6.37e-06
Ensifer canadensis	1.03e-05	0.000124495	1.72e-06	2.1e-06	0	6.59e-06	9.8e-07	1.68e-05	0	4.86e-08	4.28e-07	0.000117529	7.87e-06	1.63e-06	2.12e-06
Ensifer sp. PDNC004	1.15e-05	0.000378709	4.04e-06	7.76e-07	0	7.2e-07	1.61e-06	9.26e-06	4.65e-07	5.84e-07	1.82e-06	9.22e-05	1.15e-06	1.43e-06	1.87e-06
Enterobacter asburiae	8.41e-05	2.7e-05	1.1e-06	0.000203183	2.83e-06	0.000123181	6.17e-05	9.26e-05	0.000147934	5.76e-05	0.00033264	0.000116194	6.24e-05	0.000306003	2.38e-06
Enterobacter bugandensis	4.25e-05	7.84e-06	7.35e-07	6.5e-05	1.98e-05	4.15e-05	4.48e-06	2.02e-05	2.06e-05	3.12e-05	0.000171885	3.07e-05	2.67e-05	0.000176913	1.35e-06
Enterobacter cancerogenus	5.55e-05	1.13e-05	1.84e-07	0.000140921	1.32e-06	0.000107127	2.87e-06	6.43e-05	5.47e-05	4.16e-05	0.000241774	5.88e-05	4.35e-05	0.000213024	9.52e-06
Enterobacter chengduensis	3.85e-05	1.04e-05	0	4.68e-05	0	2.89e-05	4.55e-07	1.62e-05	1.24e-05	1.16e-05	0.000113556	9.35e-06	6.54e-06	7.01e-05	0
Enterobacter chuandaensis	2.66e-05	3.48e-06	0	7.66e-05	0	2.66e-05	1.96e-06	2.35e-05	1.33e-05	1.17e-05	8.62e-05	3.61e-05	1.23e-05	4.62e-05	5.15e-07
Enterobacter cloacae	0.000153156	7.84e-05	1.26e-05	0.000362826	3.19e-05	0.000266943	1.34e-05	0.000174913	0.000150105	0.000103079	0.000656825	0.000156261	7.68e-05	0.000819629	1.11e-05
Enterobacter cloacae complex sp.	1.07e-05	2.61e-06	0	3.86e-05	3.59e-06	3.02e-05	1.5e-06	1.36e-05	1.02e-05	1.33e-05	0.000100819	2.67e-05	1.33e-05	6.5e-05	7.79e-06
Enterobacter cloacae complex sp. ECL414	0	0	0	4.43e-07	0	7.2e-07	2.8e-07	1.1e-06	1.55e-07	0	2.46e-06	2.67e-06	0	1.7e-05	0
Enterobacter cloacae complex sp. ECNIH7	3.97e-07	0	0	1.99e-06	0	3.19e-06	1.75e-07	1.1e-06	1.71e-06	1.8e-06	1.4e-05	0	1.21e-07	1.3e-07	1.93e-07
Enterobacter cloacae complex sp. FDA-CDC-AR_0132	1.98e-06	0	0	3.21e-06	6.29e-08	1.03e-06	0	6.27e-07	0	0	1.18e-06	2.67e-06	0	2.09e-05	0
Enterobacter cloacae complex sp. R_G8	1.98e-06	0	0	1.88e-06	0	3.19e-06	8.05e-07	9.41e-07	1.55e-06	4.28e-06	1.42e-05	2.67e-06	3.69e-06	1.1e-05	0
Enterobacter hormaechei	0.0001	3.13e-05	6.74e-07	0.000230104	7.62e-06	0.000163932	9.66e-06	0.0001575	0.000124519	9.53e-05	0.000373952	0.000162938	5.89e-05	0.000256748	2.5e-05
Enterobacter huaxiensis	2.82e-05	8.71e-06	0	8.54e-05	4.41e-07	4.71e-05	1.78e-06	3.25e-05	2.59e-05	1.89e-05	0.000155082	3.07e-05	1.16e-05	8.41e-05	3.86e-07
Enterobacter kobei	2.38e-05	1.92e-05	3.68e-07	5.23e-05	6.55e-06	3.85e-05	1.96e-06	2.02e-05	2.34e-05	1.8e-05	0.000192649	2.54e-05	9.38e-06	8.32e-05	9.65e-07
Enterobacter ludwigii	0.000119033	2.61e-05	6.13e-06	0.000135824	2.53e-05	0.000135221	0.000236536	0.000145421	3.15e-05	5.64e-05	0.000255152	8.01e-05	7.8e-05	0.000169365	2.5e-05
Enterobacter mori	8.57e-05	4.35e-06	1.84e-07	0.000164075	1.7e-06	0.000102599	7.1e-06	7.97e-05	6.59e-05	5.73e-05	0.000349229	8.15e-05	8.77e-05	0.000233129	1.16e-05
Enterobacter oligotrophicus	3.93e-05	5.22e-06	0	6.75e-05	3.78e-07	5.19e-05	9.45e-07	3.09e-05	2e-05	2.51e-05	0.000143095	2.27e-05	1.71e-05	8.46e-05	3.22e-07
Enterobacter pseudoroggenkampii	7.94e-06	8.71e-07	0	1.31e-05	0	1.01e-05	2.45e-07	1.07e-05	2.28e-05	5.93e-06	3.26e-05	5.34e-06	7.08e-06	1.43e-06	0
Enterobacter quasiroggenkampii	3.57e-06	8.71e-07	0	1.25e-05	0	2.88e-06	4.55e-07	1.47e-05	3.1e-06	8.27e-07	1.26e-05	5.34e-06	6.05e-08	2.1e-05	0
Enterobacter roggenkampii	6.19e-05	1.39e-05	2.45e-07	0.000128956	3.46e-06	8.16e-05	7.8e-06	8.75e-05	4.42e-05	4.86e-05	0.000241025	6.28e-05	4.05e-05	0.000338731	1.4e-05
Enterobacter sichuanensis	2.38e-05	2.61e-06	1.23e-07	4.92e-05	0	3.43e-05	2.9e-06	2.29e-05	1.35e-05	4.64e-05	0.000101462	2.54e-05	5.21e-06	3.66e-05	3.86e-07
Enterobacter soli	2.66e-05	1.74e-06	0	5.45e-05	6.29e-08	4.48e-05	4.2e-07	1.58e-05	1.32e-05	2.9e-05	0.000103067	1.87e-05	1.77e-05	6.47e-05	3.22e-07
Enterobacter sp. 18A13	3.17e-06	8.71e-07	0	2.13e-05	0	6.28e-06	1.05e-07	3.14e-06	1.24e-06	0	2.35e-05	6.68e-06	1.07e-05	1.3e-06	0
Enterobacter sp. 638	1.79e-05	5.22e-06	0	0.000902468	6.29e-08	9.36e-05	6.65e-06	0.00122329	0.00239547	1.5e-05	0.00445393	0.000180301	5.15e-06	2.89e-05	2.57e-06
Enterobacter sp. BIDMC 29	1.11e-05	0	0	7.53e-06	6.29e-08	3.91e-06	0	2.82e-06	2.33e-06	2.33e-06	2.91e-05	2.67e-06	2.97e-06	1.95e-06	0
Enterobacter sp. BIDMC100	3.97e-07	8.71e-07	0	2.44e-06	0	4.63e-06	1.05e-07	4.71e-07	3.1e-07	0	1.07e-06	0	0	8e-06	0
Enterobacter sp. C2	2.46e-05	3.4e-05	0	7.15e-05	1.07e-06	5.91e-05	2.1e-06	1.52e-05	1.5e-05	1.25e-05	0.000122974	3.61e-05	1.54e-05	5.61e-05	3.86e-07
Enterobacter sp. Colony194	1.98e-06	0	0	1.5e-05	6.29e-08	1.33e-05	0	7.37e-06	3.26e-06	1.3e-05	2.52e-05	4.01e-06	3.63e-07	1.96e-05	0
Enterobacter sp. CP102	2.46e-05	0	0	5.13e-05	0	3.65e-05	4.2e-07	2.48e-05	2.14e-05	1.94e-05	0.000106706	1.2e-05	7.75e-06	1.8e-05	1.29e-07
Enterobacter sp. DNB-S2	7.94e-07	0	0	8.64e-06	3.02e-06	1.23e-06	0	1.88e-06	3.1e-07	2.48e-06	3.53e-06	2.67e-06	0	6.51e-08	0
Enterobacter sp. E20	3.97e-07	8.71e-07	0	2.22e-07	0	2.16e-06	0	1.41e-06	3.1e-07	5.84e-07	4.71e-06	1.34e-06	0	4.42e-06	6.43e-08
Enterobacter sp. E76	5.55e-06	5.22e-06	0	1.03e-05	0	2.33e-05	4.55e-07	3.29e-06	6.51e-06	9.49e-06	3.09e-05	2.67e-06	8.78e-06	1.28e-05	1.29e-07
Enterobacter sp. HK169	0	0	0	1.11e-07	2.49e-05	1.44e-06	0	1.25e-06	1.71e-06	2.33e-06	2.78e-06	0	6.48e-06	0	1.29e-07
Enterobacter sp. JBIWA003	7.94e-07	8.71e-07	0	9.2e-06	2.52e-07	8.85e-06	5.95e-07	5.02e-06	2.64e-06	3.84e-06	1.5e-05	5.34e-06	3.37e-05	4.14e-05	6.43e-08
Enterobacter sp. JBIWA005	1.59e-05	2.61e-06	0	1.77e-05	0	9.57e-06	5.39e-06	8e-06	5.43e-06	3.7e-06	2.75e-05	9.35e-06	7.2e-06	6.43e-05	0
Enterobacter sp. JBIWA008	1.59e-06	0	0	1.66e-06	0	2.16e-06	3.01e-06	1.25e-06	1.55e-07	1.17e-06	1.71e-06	0	0	0	0
Enterobacter sp. JUb54	5.59e-05	6.96e-06	3.61e-06	9.52e-05	5.73e-06	0.000111141	3.08e-06	4.3e-05	3.61e-05	2.79e-05	0.000272491	3.21e-05	5.6e-05	0.000218229	2.06e-06
Enterobacter sp. N18-03635	1.59e-06	0	0	2.33e-06	0	5.66e-06	7e-08	1.25e-06	2.17e-06	2.19e-06	6.96e-06	0	3.09e-06	1.3e-07	0
Enterobacter sp. R4-368	7.14e-06	0	0	1.77e-05	0	1.36e-05	3.5e-07	4.24e-06	8.06e-06	1.32e-05	4.64e-05	9.35e-06	3.15e-06	3.49e-05	1.93e-07
Enterobacter sp. RHBSTW-00175	5.48e-05	8.71e-06	3.68e-07	0.000267993	2.52e-06	6.75e-05	1.15e-06	3.34e-05	3.15e-05	1.78e-05	0.000115375	5.34e-05	2.05e-05	4.93e-05	1.03e-06
Enterobacter sp. RHBSTW-00994	5.52e-05	8.71e-06	0	9.16e-05	2.2e-05	9.74e-05	4.3e-06	5.82e-05	5.85e-05	5e-05	0.000175203	4.54e-05	2.87e-05	0.000157523	5.15e-07
Enterobacter sp. S-33	3.17e-06	8.71e-07	0	2.44e-06	0	1.96e-06	0	1.73e-06	0	1.12e-06	5.14e-06	4.01e-06	0	6.51e-07	0
Enterobacter sp. SA187	5.08e-05	4.35e-06	0	9.08e-05	2.77e-06	0.000115463	4.48e-06	6.13e-05	4.92e-05	5.75e-05	0.00152695	3.07e-05	3.49e-05	0.000181142	1.48e-06
Enterobacter sp. SES19	7.94e-07	0	0	2.22e-06	4.34e-06	4.01e-06	0	4.71e-07	1.4e-06	1.02e-06	7.49e-06	0	0	1.89e-06	6.43e-08
Enterobacter sp. SGAir0187	4.36e-06	1.74e-06	0	1.29e-05	0	9.98e-06	5.6e-07	6.12e-06	4.19e-06	8.03e-06	2.16e-05	9.35e-06	1.57e-06	1.17e-06	0
Enterobacter sp. T2	6.35e-06	1.22e-05	0	2.55e-05	0	3.19e-06	0	1.57e-07	3.1e-07	1.46e-07	3.1e-06	2.14e-05	3.09e-06	4.94e-06	8.36e-07
Enterobacteriaceae endosymbiont of Donacia tomentosa	2.78e-06	0.000147131	0	0	0	0	0	0	0	0	0	8.01e-06	6.05e-08	6.51e-08	0
Enterocloster asparagiformis	6.75e-06	4.61e-05	1.47e-06	3.32e-07	0	3.09e-07	0	1.79e-05	3.66e-05	0	7.49e-07	7.48e-05	2.18e-06	0	1.8e-06
Enterocloster bolteae	2.78e-06	2.79e-05	6.13e-08	2.22e-07	5.67e-07	3.09e-07	3.85e-07	0	0	4.86e-07	4.28e-07	4.94e-05	1.21e-07	0	1.61e-06
Enterococcus casseliflavus	7.94e-07	0.000159319	0	2.77e-06	1.26e-07	5.15e-07	0	4.71e-07	2.64e-06	0	8.56e-07	1.74e-05	6.05e-08	0	1.35e-06
Enterococcus cecorum	7.54e-06	2.26e-05	1.23e-07	0	2.52e-07	1.96e-06	3.5e-08	1.25e-06	1.71e-06	0	0	3.47e-05	5.45e-07	0	8.3e-06
Enterococcus faecalis	3.57e-05	1.13e-05	1.29e-06	1.33e-06	0	2.98e-06	3.5e-08	6.27e-07	7.75e-07	0	1.07e-07	2.67e-05	7.87e-07	3.25e-07	8.24e-06
Enterococcus faecium	3.97e-06	1.39e-05	1.23e-07	2.6e-05	1.26e-07	1.85e-06	1.05e-07	1.1e-06	1.4e-06	0	0	2.8e-05	5.45e-07	0	5.34e-06
Enterococcus hirae	5.16e-06	6.96e-06	6.13e-08	1.89e-05	1.26e-07	3.09e-07	0	1.57e-07	6.2e-07	1.95e-07	1.07e-07	1.87e-05	5.45e-07	0	3.99e-06
Enterococcus mundtii	1.19e-06	8.71e-07	6.13e-08	4.43e-07	0	6.17e-07	3.5e-08	4.71e-07	9.15e-06	4.86e-08	1.07e-07	3.07e-05	0	3.25e-07	2.57e-07
Enterococcus sp. CoE-012-22	1.59e-06	1.74e-06	3.61e-06	0	1.01e-06	8.23e-07	0	0	1.86e-06	0	0	4.01e-06	6.05e-08	0	6.43e-08
Enterococcus thailandicus	1.86e-05	6.96e-06	0	1.11e-07	0	1.44e-06	5.25e-07	1.57e-07	7.75e-07	0	0	1.87e-05	0	0	6.43e-08
Entomomonas asaccharolytica	7.94e-07	8.71e-06	0.000101814	2.22e-07	6.29e-08	1.03e-06	1.19e-06	1.57e-06	1.47e-05	3.89e-07	2.14e-07	3.61e-05	6.05e-08	4.94e-06	3.54e-06
Entomomonas moraniae	1.19e-06	3.74e-05	0.000128707	2.22e-07	1.26e-07	1.75e-06	1.05e-07	3.14e-07	9.61e-06	4.86e-08	3e-06	3.61e-05	1.21e-07	0	6.88e-06
Entomomonas sp. E2T0	3.17e-06	4.53e-05	8.57e-05	7.76e-07	1.26e-07	1.44e-06	5.25e-07	1.25e-06	2.37e-05	4.86e-08	1.07e-07	2.94e-05	9.08e-07	0	4.05e-06
Entomospira culicis	7.94e-07	7.84e-06	4.04e-06	0	0	1.03e-07	0	0	0	0	2.57e-06	1.47e-05	0	0	0
Ephemeroptericola cinctiostellae	2.62e-05	0.000191531	0	2.99e-06	3.15e-07	4.94e-06	5.6e-07	3.14e-07	7.6e-06	0	5.35e-07	0.000133556	2.06e-06	2.6e-06	2.44e-06
Epidermidibacterium keratini	5.95e-06	5.22e-05	2.45e-07	4.43e-07	0	8.23e-07	7e-08	0	0	2.92e-07	0	0.000101503	5.93e-06	0	3.73e-06
Epilithonimonas vandammei	2.94e-05	6.01e-05	1.23e-07	3.88e-06	0	1.65e-06	3.15e-07	1.57e-07	4.19e-06	0	2.14e-07	3.87e-05	9.08e-07	7.61e-06	2.12e-06
Epilithonimonas zeae	2.06e-05	2.26e-05	6.13e-08	2.99e-06	0	4.12e-07	0	1.57e-07	2.64e-06	0	1.07e-07	2.8e-05	1.27e-06	1.11e-05	6.43e-07
Ereboglobus luteus	2.5e-05	5.4e-05	6.13e-08	1.99e-06	0	7.2e-07	0	0	0	0	3.85e-06	0.000762605	9.02e-06	2.47e-06	1.48e-06
Erwinia amylovora	2.38e-05	7.84e-06	0	0.000396838	8.47e-05	0.000102805	1.48e-05	2.54e-05	4.4e-05	1.35e-05	6.08e-05	7.61e-05	4.36e-05	0.000241653	1.29e-06
Erwinia billingiae	2.22e-05	4.44e-05	3.92e-06	0.00335872	2.08e-06	0.000101056	1.35e-05	5.1e-05	0.000123588	1.86e-05	0.000140955	0.00054758	5.59e-05	0.000136052	7.4e-06
Erwinia persicina	5.83e-05	4.7e-05	2.76e-06	0.00480116	1.38e-05	0.000672709	1.22e-05	0.000229975	0.000536686	0.000140584	6.11e-05	0.000872121	0.000386478	0.000271778	7.53e-05
Erwinia pyrifoliae	6.75e-06	8.71e-07	4.95e-05	8.76e-05	1.89e-07	3.28e-05	5.25e-07	1.1e-05	3.63e-05	2.63e-06	8.35e-06	3.87e-05	0.000136575	4.59e-05	2.32e-05
Erwinia rhapontici	0.000130143	0.00048144	1.92e-05	0.0590421	9.13e-06	0.0214195	8.12e-05	0.00765976	0.120786	0.000221043	0.000172528	0.00933824	0.000494721	0.000564248	0.000159112
Erwinia sorbitola	2.46e-05	2.7e-05	2.45e-07	0.00302193	1.32e-06	0.000607157	7.8e-06	9.38e-05	0.00020841	0.000111932	4.84e-05	0.000476795	0.000122046	0.00039807	4.63e-06
Erwinia sp. DE2	2.74e-05	6.96e-06	6.13e-08	0.000433841	3.15e-07	0.000108053	3.43e-06	4.44e-05	0.000181118	1.64e-05	6.56e-05	9.62e-05	6.69e-05	0.00021348	5.4e-06
Erwinia sp. E602	3.09e-05	2.09e-05	1.84e-07	0.0024773	1.7e-06	0.0204717	4.58e-06	0.00357292	0.0102645	5.87e-05	6.76e-05	0.000411353	5.96e-05	0.000191813	1.45e-05
Erwinia sp. Ejp617	1.98e-06	1.74e-06	0	6.7e-05	1.89e-07	1.72e-05	1.75e-07	3.29e-06	1.09e-05	2.63e-06	8.03e-06	2.14e-05	3.21e-06	3.3e-05	1.29e-07
Erwinia sp. INIA01	0	0	0	1.82e-05	0	2.86e-05	2.45e-07	8.16e-06	5.89e-06	0	3.21e-07	9.35e-06	4.06e-06	3.25e-06	1.29e-07
Erwinia sp. QL-Z3	8.73e-06	1.22e-05	6.13e-08	0.000553269	6.29e-08	2.02e-05	3.32e-06	1.24e-05	1.78e-05	1.22e-05	3.02e-05	9.75e-05	1.16e-05	0.000118159	1.61e-06
Erwinia tasmaniensis	1.03e-05	1.92e-05	2.02e-06	0.000491339	5.04e-06	0.000129561	9.45e-07	3.92e-05	0.000159099	2.51e-05	2.63e-05	0.000112187	4.23e-05	0.000184916	1.67e-06
Erwinia toletana	4.88e-05	1.83e-05	3.86e-06	0.00031962	1.2e-06	0.000132854	3.88e-06	5.74e-05	0.000121572	2.94e-05	9.72e-05	7.35e-05	0.000106185	0.000247379	1.73e-05
Erwinia tracheiphila	1.31e-05	3.57e-05	4.1e-06	0.000161527	0.000137157	6.15e-05	5.04e-06	8e-05	0.000282842	3.82e-05	0.000173277	5.34e-05	4.53e-05	0.000217449	1.42e-06
Erysipelothrix sp. HDW6B	3.17e-06	3.48e-06	1.19e-05	0	0	1.03e-07	0	0	0	0	0	2.27e-05	1.21e-07	0	0
Erythrobacter aurantius	1.31e-05	1.39e-05	1.23e-07	5.54e-07	0	3.09e-07	0	0	1.55e-07	1.95e-07	0	6.81e-05	6.05e-07	7.16e-07	2.06e-06
Erythrobacter aureus	1.27e-05	0.000236802	0	7.76e-07	0	1.03e-06	0	0	6.2e-07	3.41e-07	1.18e-06	0.000105509	3.03e-07	0	2.57e-06
Erythrobacter litoralis	4.01e-05	4.27e-05	6.13e-08	9.97e-07	0	6.17e-07	3.5e-08	6.27e-07	7.75e-07	2.43e-07	2.14e-07	0.000158932	1.23e-05	1.76e-06	3.09e-06
Erythrobacter mangrovi	2.1e-05	6.53e-05	0	3.32e-07	0	1.03e-07	3.5e-07	0	0	9.73e-08	1.07e-07	6.28e-05	1.03e-06	1.04e-06	2.32e-06
Erythrobacter neustonensis	2.46e-05	9.14e-05	0	1.33e-06	0	1.23e-06	0	0	0	2.92e-07	5.35e-07	0.000102838	1.39e-06	1.3e-07	3.73e-06
Erythrobacter sp.	1.83e-05	1.74e-05	0	4.43e-07	0	7.2e-07	3.5e-08	0	0	5.84e-07	3.21e-07	9.08e-05	1.33e-06	2.6e-07	2.25e-06
Erythrobacter sp. 3-20A1M	4.4e-05	1.74e-05	0	9.97e-07	6.29e-08	1.13e-06	7e-08	0	0	5.84e-07	4.28e-07	0.000121536	7.26e-07	0	2.57e-06
Erythrobacter sp. A30-3	6.75e-06	6.09e-05	0	1.11e-07	0	2.68e-06	2.8e-07	3.14e-07	0	0	0	5.88e-05	9.08e-07	4.75e-06	4.5e-07
Erythrobacter sp. BLCC-B19	3.41e-05	0.000115789	0	3.32e-07	0	6.17e-07	0	2.98e-06	0	9.73e-08	5.35e-07	0.000112187	5.93e-06	0	2.96e-06
Erythrobacter sp. HKB08	2.78e-05	5.83e-05	0	8.86e-07	0	8.23e-07	0	1.57e-07	1.4e-06	1.46e-07	1.5e-06	8.95e-05	1.09e-06	6.51e-08	1.8e-06
Erythrobacter sp. HL-111	3.57e-05	5.92e-05	0	1.55e-06	0	5.15e-07	1.4e-07	1.57e-07	1.55e-07	3.41e-07	1.07e-07	8.01e-05	8.9e-06	0	2.57e-06
Erythrobacter sp. JK5	3.33e-05	3.31e-05	0	9.97e-07	0	3.09e-07	3.5e-08	0	0	1.95e-07	0	0.0001202	1.45e-06	0	2.64e-06
Erythrobacter sp. KY5	1.11e-05	9.84e-05	0	1.33e-06	0	4.12e-07	0	0	0	0	0	7.08e-05	2.42e-07	6.51e-08	1.16e-06
Erythrobacter sp. SCSIO 43205	6.35e-06	6.96e-06	0	2.22e-07	0	7.2e-07	7.7e-07	1.57e-07	0	0	0	8.81e-05	5.45e-07	2.6e-07	7.08e-07
Erythrobacter sp. SDW2	4.13e-05	8.71e-05	6.13e-08	7.76e-07	0	1.03e-07	3.5e-08	0	0	0	0	0.000102838	1.27e-06	1.3e-07	2.64e-06
Erythrobacter sp. THAF29	9.13e-06	1.13e-05	0	2.22e-07	0	3.09e-07	0	0	0	0	9.63e-07	4.67e-05	9.08e-07	0	1.16e-06
Escherichia albertii	2.42e-05	8.71e-06	1.53e-06	9.2e-05	8.31e-06	7.78e-05	3.71e-06	5.29e-05	0.000121107	5.23e-05	0.000148554	4.67e-05	2.57e-05	0.000277894	4.63e-06
Escherichia coli	0.000210293	0.000121883	4.42e-05	0.000444365	5.26e-05	0.00031603	5.03e-05	0.00135616	0.00143483	0.000190056	0.00132103	0.000293823	0.000199111	0.000953859	4.32e-05
Escherichia fergusonii	0.000250764	6.96e-06	2.45e-07	6.79e-05	1.4e-05	5.33e-05	1.47e-06	3.31e-05	4.82e-05	2.71e-05	9.87e-05	4.41e-05	1.33e-05	0.000150106	7.72e-07
Escherichia marmotae	9.92e-06	0	6.13e-08	6.33e-05	6.29e-08	4.74e-05	2.62e-06	4.22e-05	5.57e-05	3.08e-05	0.000113984	3.87e-05	2.79e-05	9.84e-05	1.87e-06
Escherichia ruysiae	2.38e-06	8.71e-07	8.03e-06	2.44e-06	6.29e-08	2.98e-06	0	1.73e-06	2.02e-06	4.43e-06	5.57e-06	2.67e-06	1.11e-05	2.49e-05	0
Escherichia sp. E4742	8.73e-06	0	6.13e-08	3.78e-05	6.29e-08	3.19e-05	8.05e-07	1.35e-05	3.16e-05	1.39e-05	5.49e-05	1.2e-05	1.44e-05	6.29e-05	3.22e-07
Ethanoligenens harbinense	4.76e-06	7.84e-06	0	5.54e-07	1.26e-07	8.23e-07	7e-08	1.57e-07	0	4.86e-08	1.07e-07	7.75e-05	6.05e-08	0	4.5e-07
Eubacterium maltosivorans	3.97e-07	8.71e-07	4.29e-06	3.32e-07	0	0	3.5e-08	0	4.65e-07	0	0	2.8e-05	0	0	3.86e-07
Euhalothece natronophila	2.78e-06	6.09e-06	3.98e-06	0	0	4.12e-07	0	1.57e-07	1.09e-06	4.86e-08	0	2e-05	1.45e-06	0	2.57e-07
Euzebya pacifica	6.75e-06	4e-05	6.13e-08	4.43e-07	0	7.2e-07	0	4.71e-07	1.55e-07	4.86e-08	1.07e-07	0.00016561	5.93e-06	0	1.93e-06
Euzebyella marina	1.31e-05	6.01e-05	0	2.22e-07	0	1.23e-06	0	0	6.2e-07	0	0	2.54e-05	4.24e-07	2.93e-06	6.43e-07
Evansella sp. LMS18	3.57e-06	1.22e-05	6.13e-08	2.22e-07	0	9.26e-07	0	0	0	0	0	2.54e-05	0	3.25e-06	1.93e-07
Ewingella americana	5.99e-05	1.92e-05	3.86e-06	0.000789687	5.67e-07	5.85e-05	3.04e-05	0.000272487	0.000158478	1.98e-05	8.89e-05	0.000200334	0.000460517	0.000556114	8.94e-06
Exiguobacterium acetylicum	8.73e-06	6.96e-06	1.63e-05	0	0	4.12e-07	3.5e-08	0	0	0	2.14e-07	1.07e-05	3.03e-07	0	2.57e-07
Exiguobacterium alkaliphilum	3.97e-07	3.48e-06	3.48e-05	0	0	1.03e-07	3.5e-08	0	0	0	7.49e-07	2.54e-05	2.42e-07	0	1.29e-07
Exiguobacterium antarcticum	0	3.48e-06	0.000127421	0	0	0	1.4e-07	1.25e-06	0	4.86e-08	0	2.14e-05	6.05e-08	0	0
Exiguobacterium marinum	3.97e-07	1.39e-05	7.96e-07	2.22e-07	5.54e-06	1.03e-07	0	0	1.86e-06	0	1.07e-07	1.07e-05	0	0	6.43e-08
Exiguobacterium sibiricum	0	3.48e-06	9.84e-05	5.54e-07	0	1.03e-07	0	0	1.55e-07	0	5.35e-07	1.47e-05	6.05e-08	3.9e-07	0
Exiguobacterium sp. Helios	3.97e-07	2.61e-06	0.000114127	1.44e-06	0	3.09e-07	3.5e-08	0	0	0	0	8.01e-06	1.21e-07	0	1.93e-07
Exiguobacterium sp. N4-1P	4.36e-06	2.61e-06	3.7e-05	0	0	2.78e-06	0	0	1.09e-06	0	1.39e-06	1.34e-05	1.21e-07	0	0
Faecalibacillus intestinalis	2.38e-06	8.71e-06	0	1.44e-06	0	1.13e-06	7e-08	1.57e-07	1.55e-07	0	1.07e-07	3.34e-05	6.05e-08	0	7.85e-06
Faecalibacter bovis	3.53e-05	3.92e-05	2.21e-06	1.11e-07	0	9.26e-07	0	3.14e-07	1.55e-06	0	1.07e-07	3.21e-05	7.26e-07	1.44e-05	1.22e-06
Faecalibacterium prausnitzii	5.95e-06	2e-05	0	6.65e-07	0	1.44e-06	3.85e-07	3.14e-07	7.75e-07	3.41e-07	2.14e-06	0.000149583	1.51e-06	1.17e-06	5.82e-05
Faecalibacterium sp. HTF-F	0	6.09e-06	0	1.11e-07	0	6.17e-07	0	1.57e-07	1.55e-07	1.46e-07	0	9.35e-06	1.21e-07	0	6.88e-06
Faecalibacterium sp. I2-3-92	0	1.74e-06	0	0	0	0	0	0	0	0	6.85e-06	4.01e-06	0	0	2.57e-06
Faecalibacterium sp. I3-3-33	0	3.05e-05	6.13e-08	1.11e-07	0	1.03e-07	0	0	0	1.95e-07	0	8.01e-06	0	0	6.11e-06
Faecalibacterium sp. I3-3-89	1.59e-06	4.35e-06	0	0	0	0	0	0	0	4.86e-07	0	2e-05	1.82e-07	0	4.38e-06
Faecalibacterium sp. I4-1-79	3.97e-07	1.74e-06	0	0	0	0	0	0	0	0	0	9.35e-06	0	0	8.17e-06
Falsihalocynthiibacter arcticus	1.75e-05	4.27e-05	1.9e-06	4.43e-07	0	9.26e-07	6.3e-07	5.96e-06	0	1.95e-07	0	4.54e-05	5.45e-07	0	5.79e-07
Falsirhodobacter algicola	1.67e-05	2.18e-05	0	6.65e-07	0	1.03e-06	1.4e-07	1.1e-06	0	5.35e-07	2.03e-06	8.01e-05	1.09e-06	0	4.44e-06
Ferribacterium limneticum	0.000228148	0.000317768	2.94e-06	1.75e-05	0	9.94e-05	1.82e-06	2.98e-06	1.71e-06	2.77e-06	9.63e-06	0.00152388	1.88e-05	1.33e-05	0.000143285
Ferrigenium kumadai	3.09e-05	8.36e-05	3.49e-06	7.76e-07	6.29e-08	1.44e-06	1.29e-06	3.14e-07	1.55e-07	4.86e-08	6.42e-07	0.000404675	1.63e-05	5.86e-07	5.66e-06
Ferrimonas balearica	8.33e-06	1.65e-05	1.1e-06	4.32e-06	0	3.91e-06	1.5e-06	4.71e-06	4.19e-06	2.38e-06	6.42e-07	8.28e-05	3.27e-06	3.4e-05	9.78e-06
Ferrimonas lipolytica	3.57e-06	2.61e-06	2.63e-06	1.22e-06	7.11e-06	1.44e-06	3.5e-07	1.73e-06	7.6e-06	7.78e-07	1.07e-06	3.07e-05	7.87e-07	3.45e-06	4.5e-07
Ferrimonas sp. SCSIO 43195	1.98e-06	7.84e-06	6.13e-08	6.2e-06	1.01e-06	3.81e-06	6.65e-07	1.57e-07	1.71e-06	1.26e-06	9.63e-07	3.34e-05	4.84e-07	2.1e-05	1.48e-06
Ferrimonas sp. YFM	3.57e-06	6.96e-06	6.13e-08	7.76e-07	0	3.91e-06	6.65e-07	4.71e-07	1.71e-06	3.26e-06	2.46e-06	8.01e-05	2.6e-06	1.82e-06	1.09e-06
Ferriphaselus amnicola	2.82e-05	3.83e-05	6.13e-08	6.65e-07	0	2.37e-06	7e-08	0	0	1.46e-07	3.21e-07	0.000212354	9.08e-07	7.16e-07	2.32e-06
Ferrovibrio terrae	1.63e-05	0.000168896	1.23e-07	3.1e-06	0	1.85e-06	7.35e-07	4.71e-06	3.1e-07	4.86e-08	2.25e-06	0.000410017	1.1e-05	3.06e-06	4.18e-06
Ferrovum myxofaciens	6.35e-06	1.57e-05	1.23e-07	5.54e-07	1.13e-06	1.03e-06	1.4e-07	1.57e-07	8.53e-06	0	8.56e-07	0.000114858	1.25e-05	1.5e-06	3.02e-06
Ferruginibacter albus	2.66e-05	0.000108825	0	7.76e-07	0	1.34e-06	2.1e-07	0	1.4e-06	0	1.07e-07	0.000140234	2.18e-06	0	8.36e-07
Ferruginibacter lapsinanis	3.21e-05	0.000109695	0	1.55e-06	0	7.2e-07	0	2.98e-06	0	0	0	0.000150918	2.85e-06	2.99e-06	1.42e-06
Fibrella aestuarina	4.36e-06	2e-05	0	1.44e-06	0	8.23e-07	3.5e-08	1.57e-07	1.55e-07	0	5.35e-07	7.88e-05	9.69e-07	6.51e-08	3.67e-06
Fibrella sp. ES10-3-2-2	7.54e-06	3.05e-05	4.29e-07	1.11e-06	0	3.09e-07	0	0	0	5.84e-07	2.14e-07	7.08e-05	9.08e-07	3.9e-07	1.8e-06
Fictibacillus enclensis	1.19e-06	8.71e-06	4.59e-06	0	0	1.03e-07	1.05e-07	9.41e-07	3.88e-06	0	2.14e-07	2.14e-05	0	0	6.43e-08
Fictibacillus sp. KU28468	7.94e-07	6.96e-06	1.53e-05	5.54e-07	0	2.06e-07	0	0	1.55e-07	0	0	1.07e-05	1.21e-07	0	0
Filimonas lacunae	1.98e-05	6.01e-05	6.13e-08	1.22e-06	0	1.03e-06	0	1.57e-07	0	9.73e-08	0	0.000194992	1.51e-06	7.16e-07	7.98e-06
Fimbriimonas ginsengisoli	3.57e-06	6.7e-05	6.13e-08	4.43e-07	0	5.15e-07	3.5e-08	0	1.55e-07	0	2.14e-07	0.000260434	5.45e-07	1.3e-07	1.93e-07
Fischerella sp. NIES-3754	9.21e-05	2.44e-05	0	2.22e-07	0	5.15e-07	0	0	1.4e-06	1.95e-07	2.14e-07	2.67e-05	5.99e-06	0	7.72e-07
Fischerella sp. NIES-4106	2.78e-06	2.87e-05	0	1.11e-07	0	1.03e-07	0	0	0	4.86e-08	0	3.74e-05	6.3e-06	1.63e-06	6.43e-07
Flagellatimonas centrodinii	9.52e-06	2.18e-05	6.13e-08	1.77e-06	1.76e-06	3.09e-06	2.8e-07	6.27e-07	0	3.41e-07	2.14e-07	0.000142905	1.03e-06	1.82e-06	2.51e-06
Flagellimonas sp. CMM7	4.84e-05	7.23e-05	6.13e-08	4.43e-07	0	1.34e-06	3.5e-08	0	3.1e-07	0	2.14e-07	3.07e-05	4.84e-07	1.5e-06	1.22e-06
Flagellimonas sp. HMM57	1.79e-05	0.000130589	0	0	0	6.17e-07	0	0	1.55e-07	2.43e-07	6.42e-07	2.4e-05	1.7e-06	0	4.5e-07
Flammeovirga kamogawensis	1.19e-05	5.4e-05	0	1.11e-07	0	8.23e-07	7e-08	4.71e-07	8.22e-06	0	1.07e-07	1.87e-05	1.82e-07	1.69e-06	1.42e-06
[truncated: 4,494 more rows]
